# Supplementary material for: NF-κB RelA regulates temporal oligodendrocyte differentiation in the postnatal brains
Source: Front Cell Neurosci. 2025 Jul 22;19:1622874. doi: 10.3389/fncel.2025.1622874 (PMC12321842; doi:10.3389/fncel.2025.1622874)
Supplement: Supplementary file 1 [file Table_1.xlsx]

## Sheet: down-regulated genes
Transcripts level changes in Cnp-Cre; RelA cKO cerebral cortex (down-regulated genes, FDR<0.05)
gene ID	gene symbol	logFC	logCPM	PValue	FDR
ENSMUSG00000086503	Xist	13.084	8.11959	0	0
ENSMUSG00000043346	Gm6741	7.22984	0.205584	1.51211e-40	2.00629e-38
ENSMUSG00000096256	4933409K07Rik	1.72387	2.30889	0.0018177	0.0124421
ENSMUSG00000106396	Gm42902	1.51674	0.0940779	1.86359e-05	0.000265789
ENSMUSG00000006782	Cnp	1.4949	8.27516	7.04545e-120	5.14142e-117
ENSMUSG00000078234	Klhdc7a	1.47203	3.17685	2.83239e-23	2.40808e-21
ENSMUSG00000105843	Gm19439	1.46707	1.44606	1.49908e-06	2.78125e-05
ENSMUSG00000110086	Smim32	1.3743	1.39229	2.26301e-10	7.72598e-09
ENSMUSG00000026830	Ermn	1.35155	4.36324	6.18249e-27	6.04917e-25
ENSMUSG00000104494	Gm37111	1.26869	0.987481	6.60302e-06	0.000105709
ENSMUSG00000030680	Pagr1a	1.18876	2.25781	0.00016157	0.00170363
ENSMUSG00000000560	Gabra2	1.18592	6.33704	1.32937e-67	3.37429e-65
ENSMUSG00000032854	Ugt8a	1.14139	6.43374	2.50279e-34	2.88381e-32
ENSMUSG00000022383	Ppara	1.12425	0.316093	0.000215579	0.00216218
ENSMUSG00000032446	Eomes	1.12398	0.597544	0.000487421	0.00424822
ENSMUSG00000025383	Il23a	1.10809	0.809848	8.87467e-07	1.75035e-05
ENSMUSG00000026435	Slc45a3	1.02523	1.19781	0.000491942	0.00427587
ENSMUSG00000104415	Gm37069	0.983343	1.7931	1.07994e-05	0.000164184
ENSMUSG00000032517	Mobp	0.973697	7.76673	2.48685e-24	2.17773e-22
ENSMUSG00000024175	Tekt4	0.963518	1.0282	0.00255307	0.016415
ENSMUSG00000032648	Pygm	0.957562	4.43432	1.56564e-29	1.62252e-27
ENSMUSG00000036353	P2ry12	0.953879	5.02518	2.71442e-29	2.79649e-27
ENSMUSG00000027375	Mal	0.944972	6.87944	1.21419e-11	4.73616e-10
ENSMUSG00000102234	Gm37885	0.943763	1.99834	2.83162e-05	0.000381485
ENSMUSG00000117713	Gm46637	0.940753	0.100299	0.00203187	0.0136555
ENSMUSG00000074283	Zfp109	0.928384	1.60653	1.87296e-05	0.000266691
ENSMUSG00000018166	Erbb3	0.925451	3.08396	1.19852e-12	5.22163e-11
ENSMUSG00000033579	Fa2h	0.92389	4.85663	3.72535e-20	2.63088e-18
ENSMUSG00000064357	mt-Atp6	0.921287	10.2545	0.00286554	0.0180011
ENSMUSG00000041607	Mbp	0.914255	11.353	3.38785e-29	3.46987e-27
ENSMUSG00000019326	Aoc3	0.896274	0.523688	0.00132147	0.00964342
ENSMUSG00000110723	Gm49353	0.884059	0.971779	0.00304818	0.0188576
ENSMUSG00000033852	Gm28042	0.883993	1.09114	0.000476899	0.00417203
ENSMUSG00000034579	Pla2g3	0.882863	3.02254	4.96909e-08	1.24327e-06
ENSMUSG00000033774	Npbwr1	0.881509	0.997835	0.000354137	0.00323545
ENSMUSG00000056771	Gm10010	0.880506	1.28332	0.000582663	0.00488762
ENSMUSG00000103378	Gm37176	0.873804	1.33575	5.18133e-05	0.000644959
ENSMUSG00000114172	Gm36298	0.867489	0.430806	0.00216758	0.0143985
ENSMUSG00000028976	Slc2a5	0.866336	1.63063	4.21113e-05	0.000539925
ENSMUSG00000055415	Atp10b	0.844731	2.23866	3.11465e-08	8.14803e-07
ENSMUSG00000050121	Opalin	0.840838	3.36359	3.46559e-10	1.16054e-08
ENSMUSG00000029086	Prom1	0.838979	3.84537	2.49195e-15	1.30671e-13
ENSMUSG00000102496	Gm36989	0.838072	0.558296	0.00424474	0.0244467
ENSMUSG00000041309	Nkx6-2	0.835757	1.81786	0.000246229	0.00239182
ENSMUSG00000060716	Plekhh1	0.833891	3.91945	1.27754e-13	6.04724e-12
ENSMUSG00000048782	Insc	0.830387	0.871096	0.00034278	0.00314811
ENSMUSG00000066842	Hmcn1	0.823242	2.37732	5.24408e-05	0.000651844
ENSMUSG00000008845	Cd163	0.820867	1.87409	0.00113583	0.00852676
ENSMUSG00000032908	Sgpp2	0.817462	2.90217	8.4121e-09	2.38012e-07
ENSMUSG00000102854	C130023A14Rik	0.815184	0.477836	0.00225558	0.0148904
ENSMUSG00000023959	Clic5	0.807815	2.65069	3.21838e-05	0.000427345
ENSMUSG00000034066	Farp2	0.807503	2.82207	3.79714e-09	1.12717e-07
ENSMUSG00000094108	None	0.806599	2.10771	3.58095e-06	6.1068e-05
ENSMUSG00000058260	Serpina9	0.804816	1.47187	2.10648e-05	0.000296329
ENSMUSG00000022032	Scara5	0.80404	0.578556	0.00109062	0.00825103
ENSMUSG00000067028	Cntnap5b	0.801098	2.27718	4.4094e-06	7.41135e-05
ENSMUSG00000031425	Plp1	0.79471	10.6633	2.27908e-21	1.77403e-19
ENSMUSG00000033196	Myh2	0.789704	0.0756572	0.00749465	0.0381669
ENSMUSG00000022054	Nefm	0.789289	8.10766	8.74639e-13	3.87808e-11
ENSMUSG00000021765	Fst	0.788195	0.945637	0.00137017	0.0099244
ENSMUSG00000120789	Gm56686	0.78545	0.927315	0.00529332	0.0291624
ENSMUSG00000022076	Klhl1	0.784831	2.26493	3.65184e-05	0.000478729
ENSMUSG00000103502	9330121J05Rik	0.783561	1.27748	0.000331553	0.00306914
ENSMUSG00000073805	Insyn2a	0.783328	1.77785	4.65984e-06	7.77261e-05
ENSMUSG00000106896	G630022F23Rik	0.783312	0.100483	0.00991381	0.0476629
ENSMUSG00000047797	Gjb1	0.782759	2.29601	1.30149e-05	0.000193829
ENSMUSG00000006403	Adamts4	0.782691	4.52615	3.58225e-13	1.63384e-11
ENSMUSG00000037185	Krt80	0.782175	0.727302	0.000791647	0.00631371
ENSMUSG00000050783	Htr1f	0.781762	0.205377	0.00461242	0.0260503
ENSMUSG00000037625	Cldn11	0.780189	7.33985	2.10834e-26	1.99597e-24
ENSMUSG00000052229	Gpr17	0.77891	7.60224	5.13839e-22	4.12815e-20
ENSMUSG00000073680	Tmem88b	0.777466	4.39779	8.00564e-12	3.21584e-10
ENSMUSG00000087301	Gm13629	0.776691	1.14442	0.000697421	0.00567067
ENSMUSG00000036915	Kirrel2	0.776409	3.09342	9.39661e-07	1.8388e-05
ENSMUSG00000034584	Exph5	0.775908	2.28286	2.50713e-07	5.54417e-06
ENSMUSG00000024869	Gm49405	0.771595	1.26261	0.000525857	0.00449261
ENSMUSG00000115783	Bc1	0.767055	0.767451	0.00418461	0.0241799
ENSMUSG00000027792	Bche	0.762352	2.00652	1.35112e-05	0.000200022
ENSMUSG00000036634	Mag	0.755916	7.3618	3.22076e-20	2.30239e-18
ENSMUSG00000044952	Kctd21	0.754752	3.60439	1.28092e-07	2.97534e-06
ENSMUSG00000021388	Aspn	0.751527	0.847439	0.00208331	0.013953
ENSMUSG00000120261	Gm57009	0.749319	0.43316	0.008433	0.0420187
ENSMUSG00000053930	Shisa6	0.747199	1.31303	0.00647266	0.0340632
ENSMUSG00000037071	Scd1	0.744063	6.68574	8.72852e-15	4.41825e-13
ENSMUSG00000042988	Notum	0.742541	1.24476	0.00270026	0.0171785
ENSMUSG00000114278	Gm49027	0.741993	0.516635	0.00572459	0.0309924
ENSMUSG00000027858	Tspan2	0.740153	6.89619	5.25559e-21	3.96751e-19
ENSMUSG00000026697	Myoc	0.738257	4.56286	3.06917e-10	1.04173e-08
ENSMUSG00000121080	Gm57228	0.734083	0.242977	0.00524326	0.0289412
ENSMUSG00000005716	Pvalb	0.727599	4.33008	1.61403e-11	6.2402e-10
ENSMUSG00000046854	Pip5kl1	0.723666	1.92368	0.000151356	0.00161835
ENSMUSG00000097596	Gm26673	0.723648	0.28549	0.00733957	0.0375314
ENSMUSG00000020774	Aspa	0.719362	1.9757	8.43129e-05	0.000980516
ENSMUSG00000028197	Col24a1	0.714378	3.18858	4.52259e-08	1.14569e-06
ENSMUSG00000022829	Stxbp5l	0.713221	4.14716	3.87748e-07	8.19182e-06
ENSMUSG00000107705	Gm45062	0.710696	4.21759	4.29708e-07	9.01307e-06
ENSMUSG00000031870	Pgr	0.708735	3.93871	4.58311e-10	1.51165e-08
ENSMUSG00000037166	Ppp1r14a	0.708488	2.1996	6.22055e-05	0.000756575
ENSMUSG00000031385	Plxnb3	0.707388	4.39997	1.33755e-09	4.19819e-08
ENSMUSG00000038496	Slc19a3	0.70681	1.47005	0.000360627	0.00327435
ENSMUSG00000002100	Mybpc3	0.705429	1.01205	0.00393745	0.0230869
ENSMUSG00000121226	6720407P12Rik	0.704371	1.1868	0.00328862	0.0200267
ENSMUSG00000037111	Setd7	0.702382	6.77831	1.70998e-19	1.1608e-17
ENSMUSG00000026839	Upp2	0.700162	1.45884	0.000462789	0.00406892
ENSMUSG00000023795	Pisd-ps2	0.7	1.04398	0.00374688	0.0222526
ENSMUSG00000032942	Ucp3	0.699383	0.450335	0.00872378	0.0432093
ENSMUSG00000055027	Smyd1	0.698069	2.48176	0.00011441	0.00127386
ENSMUSG00000063260	Syt10	0.69585	1.68955	0.000128623	0.00141147
ENSMUSG00000040055	Gjb6	0.694525	5.85033	6.23605e-14	3.03384e-12
ENSMUSG00000039763	Dnajc28	0.691099	3.14959	1.97135e-06	3.55209e-05
ENSMUSG00000115422	4930452G13Rik	0.686404	0.438706	0.00888663	0.0438054
ENSMUSG00000045246	Kcng4	0.682597	1.7721	0.00118982	0.00886366
ENSMUSG00000028655	Mfsd2a	0.681256	5.25849	5.39743e-14	2.64052e-12
ENSMUSG00000037014	Sstr4	0.67895	2.69187	0.000149011	0.0015962
ENSMUSG00000050288	Fzd2	0.678352	3.65425	6.01653e-06	9.72977e-05
ENSMUSG00000047976	Kcna1	0.675562	4.63306	4.83474e-08	1.21312e-06
ENSMUSG00000031209	Heph	0.672306	2.12735	7.99235e-05	0.00093945
ENSMUSG00000041624	Gucy1a2	0.667606	2.00423	0.000169916	0.00178198
ENSMUSG00000027896	Slc16a4	0.665793	1.36791	0.00209675	0.0140055
ENSMUSG00000026141	Col19a1	0.663265	2.3878	6.39413e-05	0.00077607
ENSMUSG00000025905	Oprk1	0.661836	3.3666	2.31926e-06	4.11963e-05
ENSMUSG00000035606	Ky	0.661363	2.49818	4.8808e-06	8.07198e-05
ENSMUSG00000045319	Proser2	0.657474	1.36222	0.00243664	0.0158115
ENSMUSG00000072720	Myo18b	0.656757	1.48235	0.00196748	0.0132788
ENSMUSG00000076439	Mog	0.653861	5.91657	1.29385e-13	6.10793e-12
ENSMUSG00000029343	Crybb1	0.652455	3.0914	0.000238633	0.00234273
ENSMUSG00000021702	Thbs4	0.650444	2.394	0.000240187	0.00235027
ENSMUSG00000083396	Gm15542	0.649696	2.90011	7.63205e-05	0.00090316
ENSMUSG00000021750	Fam107a	0.649522	8.29408	5.92152e-10	1.92768e-08
ENSMUSG00000102555	6430511E19Rik	0.647235	1.82191	0.000309369	0.00290058
ENSMUSG00000078747	Gm20878	0.645078	2.26545	4.13472e-05	0.000530905
ENSMUSG00000044176	Spink10	0.640412	2.24303	0.000245958	0.00239182
ENSMUSG00000031551	Ido1	0.63953	1.1607	0.00865428	0.042938
ENSMUSG00000033960	Jcad	0.639436	6.62815	3.81485e-11	1.44931e-09
ENSMUSG00000030878	Cdr2	0.63902	2.41388	0.000157183	0.00166842
ENSMUSG00000034853	Acot11	0.637092	5.25616	1.73498e-13	8.12471e-12
ENSMUSG00000057337	Chst3	0.636713	2.36517	0.000185202	0.00191139
ENSMUSG00000087380	2210408F21Rik	0.63495	2.60147	9.22961e-05	0.00106068
ENSMUSG00000020734	Grin2c	0.634783	5.08275	3.20842e-17	1.892e-15
ENSMUSG00000031433	Rbm41	0.634149	2.31504	2.86407e-05	0.00038556
ENSMUSG00000022546	Gpt	0.633367	2.16	4.46638e-05	0.000566431
ENSMUSG00000099041	Gm28035	0.631343	2.02771	0.00306465	0.0189286
ENSMUSG00000102504	Gm21955	0.629769	3.7027	1.52723e-05	0.0002229
ENSMUSG00000028927	Padi2	0.629379	4.2326	8.47763e-10	2.7045e-08
ENSMUSG00000035045	Zc3h12b	0.626519	1.97318	0.000931198	0.00725813
ENSMUSG00000010051	Hyal1	0.62565	1.89079	0.000189475	0.00195089
ENSMUSG00000045087	S1pr5	0.625313	2.97944	0.000159074	0.00168254
ENSMUSG00000090093	Gm14399	0.624043	1.67867	0.00172349	0.0119404
ENSMUSG00000032554	Trf	0.619894	6.10897	1.73665e-15	9.20168e-14
ENSMUSG00000028211	Trp53inp1	0.618639	4.5245	1.30567e-07	3.0208e-06
ENSMUSG00000026826	Nr4a2	0.612875	5.02039	2.89809e-08	7.62983e-07
ENSMUSG00000002190	Clgn	0.612498	3.94172	1.46722e-09	4.58054e-08
ENSMUSG00000040229	Gpr34	0.608243	3.07698	3.89312e-06	6.61981e-05
ENSMUSG00000026879	Gsn	0.607853	6.65964	5.01548e-15	2.59885e-13
ENSMUSG00000040260	Daam2	0.604922	4.61854	2.28408e-07	5.09596e-06
ENSMUSG00000017009	Sdc4	0.604729	5.78782	2.61385e-09	7.86581e-08
ENSMUSG00000015852	Fcrl2	0.60331	4.46152	1.54712e-07	3.55054e-06
ENSMUSG00000074968	Ano3	0.602358	5.95123	1.84697e-10	6.39285e-09
ENSMUSG00000007653	Gabrb2	0.598933	6.15654	8.68318e-15	4.40803e-13
ENSMUSG00000078117	Gm16485	0.597202	3.01236	1.18227e-06	2.26298e-05
ENSMUSG00000033985	Tesk2	0.593127	2.17435	0.000302651	0.0028498
ENSMUSG00000037996	Slc24a2	0.592883	8.55214	7.32472e-14	3.51466e-12
ENSMUSG00000031488	Rab11fip1	0.592806	1.43308	0.0100523	0.0481922
ENSMUSG00000042514	Klhl14	0.592799	1.22406	0.00391189	0.0229601
ENSMUSG00000032060	Cryab	0.591165	5.26612	6.68835e-13	3.01907e-11
ENSMUSG00000025332	Kdm5c	0.59077	5.87846	9.12446e-12	3.63195e-10
ENSMUSG00000078861	Zfp931	0.590287	3.20786	3.60878e-06	6.14826e-05
ENSMUSG00000043448	Gjc2	0.587051	4.11564	4.73003e-11	1.78538e-09
ENSMUSG00000046480	Scn4b	0.585664	6.52143	0.000273216	0.00260339
ENSMUSG00000026065	Slc9a4	0.584984	0.870516	0.00930167	0.0454293
ENSMUSG00000020183	Cpm	0.584906	2.40377	0.0005088	0.00437893
ENSMUSG00000016194	Hsd11b1	0.584665	4.04776	2.6078e-10	8.88581e-09
ENSMUSG00000017868	Sgk2	0.584151	0.878421	0.00973962	0.0469787
ENSMUSG00000029130	Rnf32	0.583343	2.78805	8.52426e-06	0.000133179
ENSMUSG00000031762	Mt2	0.583104	6.96023	6.91387e-05	0.000830518
ENSMUSG00000060962	Dmkn	0.58228	1.03726	0.00906663	0.0445691
ENSMUSG00000039103	Nexn	0.582233	2.71114	0.00438012	0.0249789
ENSMUSG00000106990	Gm42547	0.580818	2.51278	0.00033981	0.00313233
ENSMUSG00000019906	Lin7a	0.580723	4.2182	3.52239e-08	9.11242e-07
ENSMUSG00000001542	Ell2	0.579763	4.64554	1.19226e-09	3.75561e-08
ENSMUSG00000085334	Gm12940	0.578293	3.20925	1.59013e-05	0.000230925
ENSMUSG00000045464	2810002D19Rik	0.577893	1.44481	0.00213341	0.0141909
ENSMUSG00000031381	Piga	0.577719	2.77984	3.24264e-05	0.000429156
ENSMUSG00000032006	Pdgfd	0.574396	2.2922	0.000347953	0.0031906
ENSMUSG00000043461	Sptssb	0.573771	1.40031	0.00630896	0.0334523
ENSMUSG00000031596	Slc7a2	0.572927	4.6756	1.04763e-07	2.46948e-06
ENSMUSG00000038128	Camk4	0.570212	5.49879	7.11275e-11	2.61707e-09
ENSMUSG00000039405	Prss23	0.56784	3.3299	0.000789856	0.00630804
ENSMUSG00000037280	Galnt6	0.567177	1.93362	0.000478815	0.00418531
ENSMUSG00000073988	Ttpa	0.567157	2.69888	5.25863e-05	0.000652726
ENSMUSG00000065947	mt-Nd4l	0.563807	7.55508	0.00060434	0.00503061
ENSMUSG00000064356	mt-Atp8	0.563278	7.12814	3.54519e-10	1.18268e-08
ENSMUSG00000038048	Cntnap5c	0.563134	1.61273	0.00566416	0.0307699
ENSMUSG00000025429	Pstpip2	0.559801	2.09245	0.0032256	0.0197115
ENSMUSG00000109006	B230209E15Rik	0.559396	3.48174	0.000319001	0.00297497
ENSMUSG00000071862	Lrrtm2	0.5585	6.12436	5.125e-11	1.92204e-09
ENSMUSG00000035615	Frmpd1	0.558096	4.00036	4.39274e-06	7.39044e-05
ENSMUSG00000049092	Gpr137c	0.556526	4.89351	1.00418e-11	3.96109e-10
ENSMUSG00000020486	Septin4	0.555874	5.79606	2.19983e-14	1.10079e-12
ENSMUSG00000044042	Fmn1	0.553006	3.40717	4.25243e-07	8.93011e-06
ENSMUSG00000020591	Ntsr2	0.552982	6.12787	7.0175e-20	4.83876e-18
ENSMUSG00000061436	Hipk2	0.552743	4.84571	9.7342e-08	2.31637e-06
ENSMUSG00000022594	Lynx1	0.55268	8.6325	5.05327e-21	3.84795e-19
ENSMUSG00000050423	Ppp1r3g	0.551441	3.32562	8.55771e-07	1.69547e-05
ENSMUSG00000044033	Ccdc141	0.549964	4.35949	3.97313e-06	6.73625e-05
ENSMUSG00000028864	Hgf	0.549897	1.4375	0.00534411	0.0293499
ENSMUSG00000024168	Tmem204	0.549878	2.70096	0.000307939	0.00288872
ENSMUSG00000039904	Gpr37	0.547052	4.71036	9.80349e-11	3.51841e-09
ENSMUSG00000040624	Plekhg1	0.54514	4.58927	6.83522e-08	1.6673e-06
ENSMUSG00000024395	Lims2	0.542397	3.72377	3.9102e-05	0.000506532
ENSMUSG00000052609	Plekhg3	0.540678	3.22815	2.15848e-05	0.000301946
ENSMUSG00000020623	Map2k6	0.539642	2.90701	9.55705e-05	0.00108973
ENSMUSG00000097789	Ctxnd1	0.53886	4.37901	0.000107293	0.00119919
ENSMUSG00000056966	Gjc3	0.5385	4.80238	6.22539e-08	1.53349e-06
ENSMUSG00000015202	Cnksr3	0.537827	3.72864	7.05756e-05	0.000845647
ENSMUSG00000047228	A2ml1	0.537806	2.84209	0.000100975	0.00114021
ENSMUSG00000044519	Zfp488	0.537509	3.08116	2.26745e-05	0.000315927
ENSMUSG00000034000	Neu4	0.537347	3.90367	2.90137e-08	7.62983e-07
ENSMUSG00000036777	Anln	0.537187	3.02197	2.21274e-05	0.000309042
ENSMUSG00000022836	Mylk	0.535507	3.5187	0.000206991	0.00208707
ENSMUSG00000038059	Smim3	0.534841	4.42706	3.83603e-05	0.00049803
ENSMUSG00000054619	Tmt1a	0.534649	3.64911	3.3471e-05	0.000441756
ENSMUSG00000055945	Prr18	0.532522	3.97848	7.61668e-06	0.000120396
ENSMUSG00000022419	Deptor	0.532134	4.1353	2.2424e-06	3.99119e-05
ENSMUSG00000022769	Sdf2l1	0.531271	3.05928	7.0731e-05	0.000846163
ENSMUSG00000005871	Apc	0.529883	9.454	1.5657e-13	7.35163e-12
ENSMUSG00000050600	Zfp831	0.527008	4.1497	4.10789e-06	6.94455e-05
ENSMUSG00000029209	Gnpda2	0.52628	3.73436	1.82648e-06	3.32872e-05
ENSMUSG00000035150	Eif2s3x	0.525217	7.256	1.9765e-20	1.43637e-18
ENSMUSG00000019577	Pdk4	0.5251	3.01398	4.33305e-05	0.000552725
ENSMUSG00000038916	Mtcl3	0.524734	5.63527	7.51094e-11	2.74055e-09
ENSMUSG00000028246	Faxc	0.524234	4.02822	2.48166e-06	4.37702e-05
ENSMUSG00000013523	Bcas1	0.524134	7.124	1.3797e-19	9.40237e-18
ENSMUSG00000030486	Zfp108	0.52185	2.28189	0.00402882	0.0235124
ENSMUSG00000038668	Lpar1	0.521344	4.80942	3.99076e-06	6.75306e-05
ENSMUSG00000042510	AA986860	0.521335	1.32487	0.00958643	0.0464444
ENSMUSG00000008734	Gprc5b	0.520723	6.61841	2.13521e-17	1.28069e-15
ENSMUSG00000026255	Efhd1	0.518999	2.72888	0.000236589	0.00232787
ENSMUSG00000039478	Micu3	0.517878	4.68592	4.2434e-10	1.4049e-08
ENSMUSG00000027524	Edn3	0.517814	2.4351	0.00170235	0.011822
ENSMUSG00000089774	Slc5a3	0.517703	3.95013	8.43826e-07	1.6775e-05
ENSMUSG00000027820	Mme	0.517684	3.74719	2.08472e-05	0.00029374
ENSMUSG00000007827	Ankrd26	0.51717	3.83629	2.25613e-05	0.000314851
ENSMUSG00000031210	Gpr165	0.516284	2.88417	0.00837431	0.0418095
ENSMUSG00000038173	Enpp6	0.514914	5.0295	4.68572e-12	1.94009e-10
ENSMUSG00000042515	Pwwp3b	0.511116	2.20312	0.00110305	0.00833059
ENSMUSG00000120081	Gm57354	0.509573	2.54376	0.00444295	0.0252806
ENSMUSG00000028862	Map3k6	0.509311	1.98554	0.00636784	0.0336742
ENSMUSG00000020137	Thap2	0.507257	3.94385	1.41825e-06	2.65661e-05
ENSMUSG00000045875	Adra1a	0.506806	2.89861	0.00139362	0.0100692
ENSMUSG00000048583	Igf2	0.506401	7.43324	6.89721e-12	2.80273e-10
ENSMUSG00000034472	Rasd2	0.505934	6.13004	2.32608e-07	5.17649e-06
ENSMUSG00000022602	Arc	0.505934	6.14265	0.000595537	0.00497327
ENSMUSG00000036975	Tmem177	0.502256	3.14764	8.79771e-05	0.00101504
ENSMUSG00000027966	Col11a1	0.498588	3.9988	3.23122e-06	5.55365e-05
ENSMUSG00000025931	Paqr8	0.497971	7.16094	2.58671e-09	7.81097e-08
ENSMUSG00000060862	Zbtb40	0.496313	3.31772	0.00144925	0.0103898
ENSMUSG00000089945	Pakap	0.496096	3.5113	0.000638266	0.00525947
ENSMUSG00000022358	Fbxo32	0.496046	3.74352	4.2734e-06	7.20761e-05
ENSMUSG00000026864	Hspa5	0.495837	8.09599	7.50982e-13	3.37249e-11
ENSMUSG00000010021	Kif19a	0.494942	3.67471	2.65257e-06	4.6457e-05
ENSMUSG00000021835	Bmp4	0.493563	2.74406	0.00490635	0.0274098
ENSMUSG00000006205	Htra1	0.492844	7.21504	9.40148e-14	4.47439e-12
ENSMUSG00000002475	Abhd3	0.492755	5.13048	3.00133e-11	1.14771e-09
ENSMUSG00000087174	5530601H04Rik	0.49231	3.6381	1.69136e-05	0.000243807
ENSMUSG00000017167	Cntnap1	0.491494	7.28257	4.95537e-08	1.24161e-06
ENSMUSG00000016763	Scube1	0.491452	5.03151	1.99359e-06	3.58846e-05
ENSMUSG00000026442	Nfasc	0.489952	8.5614	1.67577e-08	4.55029e-07
ENSMUSG00000031617	Tmem184c	0.489575	5.70395	2.75713e-13	1.28427e-11
ENSMUSG00000039414	Heatr5b	0.489381	5.13895	1.73134e-07	3.94312e-06
ENSMUSG00000108880	Gm44560	0.488171	1.55655	0.00962182	0.0465745
ENSMUSG00000061718	Ppp1r1b	0.487344	8.07735	0.00229378	0.0150775
ENSMUSG00000046230	Vps13a	0.485126	5.24599	1.32913e-10	4.71222e-09
ENSMUSG00000035284	Vps13c	0.484927	4.82881	3.76663e-05	0.00049011
ENSMUSG00000055373	Fut9	0.484804	6.84667	7.46681e-11	2.73014e-09
ENSMUSG00000054409	Tmem74	0.4848	3.21027	0.00063844	0.00525947
ENSMUSG00000041592	Sdk2	0.484382	5.24914	7.65064e-05	0.000904748
ENSMUSG00000067879	Vxn	0.484207	8.22065	5.76115e-12	2.36301e-10
ENSMUSG00000055923	Aasdh	0.484173	2.74059	0.000614641	0.00509216
ENSMUSG00000027605	Acss2	0.482994	5.29839	1.22548e-12	5.32584e-11
ENSMUSG00000051721	Wdcp	0.481443	2.85647	0.00498708	0.0277899
ENSMUSG00000041762	Gpr155	0.480625	5.72505	2.65987e-10	9.04562e-09
ENSMUSG00000036949	Slc39a12	0.480159	5.35386	1.2118e-10	4.30497e-09
ENSMUSG00000052684	Jun	0.478877	5.75811	1.01301e-08	2.82064e-07
ENSMUSG00000043301	Kcnj6	0.478694	3.84295	4.71897e-06	7.85628e-05
ENSMUSG00000066687	Zbtb16	0.477569	4.84582	0.00222466	0.0147196
ENSMUSG00000032702	Kank1	0.477317	5.07754	1.84866e-09	5.7204e-08
ENSMUSG00000094410	Zbed6	0.476785	5.00225	0.00326536	0.0199128
ENSMUSG00000040738	Ints8	0.476395	4.07757	6.63886e-06	0.000106185
ENSMUSG00000042246	Tmc7	0.476109	4.22946	6.40696e-05	0.000777088
ENSMUSG00000022639	Dubr	0.475249	2.52109	0.00106866	0.00810241
ENSMUSG00000053465	Hs6st3	0.47515	2.94743	0.000410986	0.00367808
ENSMUSG00000045414	Dipk2a	0.474363	5.38321	1.99125e-08	5.32439e-07
ENSMUSG00000034235	Usp54	0.473222	5.39855	2.12128e-07	4.76309e-06
ENSMUSG00000021573	Tppp	0.472799	8.64907	1.72345e-10	6.0009e-09
ENSMUSG00000020396	Nefh	0.472465	5.9357	1.79578e-05	0.000256745
ENSMUSG00000031431	Tsc22d3	0.472225	6.50439	2.82275e-07	6.15661e-06
ENSMUSG00000022742	Cpox	0.472021	5.08972	3.55314e-07	7.57975e-06
ENSMUSG00000096718	Zfp781	0.471068	2.27704	0.00430164	0.0246741
ENSMUSG00000022096	Hr	0.470122	5.76271	4.38627e-10	1.44945e-08
ENSMUSG00000036390	Gadd45a	0.468302	2.18716	0.00410021	0.0237942
ENSMUSG00000028696	Ipp	0.467632	2.86752	0.000197467	0.0020154
ENSMUSG00000047635	Mtrfr	0.467602	3.76451	5.60929e-06	9.15574e-05
ENSMUSG00000023868	Pde10a	0.466689	7.23746	0.00202776	0.0136331
ENSMUSG00000020182	Ddc	0.466163	2.71204	0.00287338	0.0180374
ENSMUSG00000051650	B3gnt2	0.466067	4.03183	0.000139337	0.00151012
ENSMUSG00000034573	Ptpn13	0.46597	3.90483	9.95029e-06	0.000153205
ENSMUSG00000027562	Car2	0.465216	6.21639	6.73791e-11	2.48961e-09
ENSMUSG00000026473	Glul	0.463669	10.0348	4.75819e-12	1.96544e-10
ENSMUSG00000021732	Fgf10	0.463552	2.49683	0.00241216	0.0156966
ENSMUSG00000034639	Setmar	0.463244	1.74561	0.0105081	0.0498617
ENSMUSG00000053965	Pde5a	0.463149	3.1374	0.00193174	0.0130829
ENSMUSG00000020411	Nipal4	0.463051	2.55284	0.00307205	0.0189651
ENSMUSG00000015944	Castor2	0.463018	7.27863	8.43937e-10	2.69721e-08
ENSMUSG00000107134	Gm42528	0.462975	3.05983	0.000768693	0.00616151
ENSMUSG00000049230	Myef2l	0.462777	2.31654	0.005711	0.030938
ENSMUSG00000072294	Klf12	0.461265	3.81019	0.000172397	0.00180476
ENSMUSG00000090122	Kcne5	0.460698	3.04242	0.000423181	0.00376549
ENSMUSG00000071176	Arhgef10	0.460299	4.69346	1.83599e-06	3.34257e-05
ENSMUSG00000054252	Fgfr3	0.46029	6.56665	1.54921e-08	4.21972e-07
ENSMUSG00000036273	Lrrk2	0.458687	4.7699	3.08555e-07	6.71308e-06
ENSMUSG00000084842	Pabpc1l2b	0.458068	3.58581	0.000350686	0.00320727
ENSMUSG00000033904	Ccp110	0.457641	5.44919	2.25265e-09	6.83759e-08
ENSMUSG00000036098	Myrf	0.457606	5.0735	1.07118e-08	2.97789e-07
ENSMUSG00000034903	Cobll1	0.456475	2.77779	0.00238553	0.0155695
ENSMUSG00000041205	Map6d1	0.455636	5.87548	9.51051e-13	4.16418e-11
ENSMUSG00000032220	Myo1e	0.454961	4.35422	1.13431e-05	0.000171579
ENSMUSG00000026610	Esrrg	0.453913	4.41448	6.78822e-06	0.000108442
ENSMUSG00000011884	Gltp	0.453013	5.63315	8.56523e-09	2.41954e-07
ENSMUSG00000044708	Kcnj10	0.451752	7.08074	1.89329e-06	3.42782e-05
ENSMUSG00000040455	Usp45	0.451704	5.2334	2.67481e-08	7.05523e-07
ENSMUSG00000082016	Pgam1-ps2	0.451458	2.65275	0.00166713	0.0116142
ENSMUSG00000021696	Elovl7	0.450876	3.58765	4.0279e-05	0.00051833
ENSMUSG00000041605	Inava	0.450587	2.26139	0.00237698	0.0155279
ENSMUSG00000063531	Sema3e	0.449942	4.86361	5.3532e-05	0.000662586
ENSMUSG00000040254	Sema3d	0.449804	3.57517	0.000100735	0.00113898
ENSMUSG00000036676	Tmtc3	0.449689	3.58254	0.000155965	0.00166052
ENSMUSG00000020173	Cobl	0.449183	6.02002	6.38345e-10	2.05514e-08
ENSMUSG00000030249	Abcc9	0.448265	3.37582	0.00669925	0.0350764
ENSMUSG00000026384	Ptpn4	0.447851	6.28953	2.11209e-11	8.11209e-10
ENSMUSG00000043313	Pcdhb19	0.447739	2.92825	0.00181758	0.0124421
ENSMUSG00000041797	Abca9	0.446613	3.54032	0.00367029	0.0219017
ENSMUSG00000049630	C1ql3	0.446515	5.58889	6.51744e-06	0.00010453
ENSMUSG00000040721	Zfhx2	0.446361	5.61457	2.4218e-05	0.000334191
ENSMUSG00000027016	Zfp385b	0.444705	5.09484	1.41648e-06	2.65613e-05
ENSMUSG00000046818	Ddit4l	0.443866	3.5644	0.000340841	0.00313688
ENSMUSG00000050192	Eif5a2	0.443413	5.03316	6.33159e-09	1.82688e-07
ENSMUSG00000022678	Nde1	0.443307	4.44551	2.1026e-05	0.00029602
ENSMUSG00000001768	Rin2	0.442762	4.95561	1.65545e-07	3.79001e-06
ENSMUSG00000033282	Rpgrip1l	0.442635	4.33149	2.95763e-05	0.000396023
ENSMUSG00000037235	Mxd4	0.442301	6.48027	8.42613e-13	3.74556e-11
ENSMUSG00000090053	Pakap	0.441389	3.85379	0.000300158	0.00283079
ENSMUSG00000020150	Gamt	0.439903	3.35045	0.000109128	0.00121737
ENSMUSG00000059554	Ccdc28a	0.439421	3.44004	0.000345163	0.00316668
ENSMUSG00000021587	Pcsk1	0.438797	5.3773	6.48091e-09	1.86382e-07
ENSMUSG00000040729	Cep126	0.438256	3.44237	0.00142181	0.0102434
ENSMUSG00000047419	Cmya5	0.437914	2.56625	0.00609725	0.0326267
ENSMUSG00000034997	Htr2a	0.437804	4.88671	1.66336e-06	3.05049e-05
ENSMUSG00000040138	Ndp	0.436294	2.67544	0.00465409	0.0262517
ENSMUSG00000083899	Gm12346	0.43542	2.74017	0.00150533	0.0107215
ENSMUSG00000043456	Zfp536	0.435389	2.86543	0.00406757	0.023678
ENSMUSG00000060257	Scrt2	0.434434	3.58622	0.000321295	0.00299158
ENSMUSG00000015149	Sirt2	0.434419	8.15323	5.18268e-14	2.5497e-12
ENSMUSG00000050663	Trhde	0.434399	4.6577	1.51956e-05	0.000221965
ENSMUSG00000023336	Wfdc1	0.434069	2.36181	0.00447001	0.0253937
ENSMUSG00000086968	4933431E20Rik	0.433877	6.66076	1.59717e-11	6.18869e-10
ENSMUSG00000020513	Tubd1	0.43321	2.34756	0.00539819	0.0295912
ENSMUSG00000045613	Chrm2	0.433023	3.55612	0.000940313	0.00731614
ENSMUSG00000029659	Medag	0.432796	2.98231	0.00289169	0.0181349
ENSMUSG00000057716	Tmem178b	0.432788	5.84049	3.48328e-06	5.96347e-05
ENSMUSG00000020422	Tns3	0.432474	6.3967	9.40028e-09	2.63418e-07
ENSMUSG00000116594	Gm49601	0.431277	5.42102	2.18336e-08	5.80265e-07
ENSMUSG00000035614	Togaram1	0.431212	5.55353	2.30397e-08	6.10466e-07
ENSMUSG00000038630	Zkscan16	0.430653	3.71017	0.00601285	0.0322836
ENSMUSG00000026840	Lamc3	0.428986	3.1416	0.00429787	0.0246741
ENSMUSG00000064036	Mro	0.428959	3.14023	0.000855686	0.00674763
ENSMUSG00000028414	Fktn	0.428459	5.85201	1.79522e-09	5.56486e-08
ENSMUSG00000117286	Gm1043	0.428456	4.21758	3.03829e-05	0.000405275
ENSMUSG00000050953	Gja1	0.426946	7.77975	7.62434e-12	3.07679e-10
ENSMUSG00000027263	Tubgcp4	0.426824	4.47756	4.13795e-06	6.98863e-05
ENSMUSG00000061740	Cyp2d22	0.426635	3.7888	0.00332004	0.020155
ENSMUSG00000057604	Lmcd1	0.426043	2.62531	0.00388464	0.0228461
ENSMUSG00000060002	Chpt1	0.424914	5.32182	3.11704e-08	8.14803e-07
ENSMUSG00000041930	Fam222a	0.424696	3.08364	0.00960027	0.0464858
ENSMUSG00000011256	Adam19	0.42433	5.237	1.07567e-07	2.52536e-06
ENSMUSG00000027956	Tmem144	0.424145	2.33057	0.00711771	0.0367294
ENSMUSG00000020333	Acsl6	0.423929	7.48339	3.36822e-10	1.13444e-08
ENSMUSG00000020309	Chac2	0.423804	3.51142	0.00018045	0.00186896
ENSMUSG00000029436	Mmp17	0.423468	7.62316	2.23518e-12	9.52482e-11
ENSMUSG00000040584	Abcb1a	0.42324	4.58053	0.000570784	0.0048177
ENSMUSG00000040852	Plekhh2	0.423219	2.83372	0.00224714	0.0148403
ENSMUSG00000007594	Hapln4	0.423003	4.39666	0.00319813	0.0195641
ENSMUSG00000061353	Cxcl12	0.421618	5.66461	5.64291e-08	1.39393e-06
ENSMUSG00000090935	Synj2bp	0.421315	4.69326	4.95168e-05	0.000620785
ENSMUSG00000026452	Syt2	0.420411	4.82813	1.13505e-06	2.18453e-05
ENSMUSG00000019971	Cep290	0.420086	3.30915	0.00131372	0.00959488
ENSMUSG00000031775	Pllp	0.41928	5.62877	2.05591e-09	6.29497e-08
ENSMUSG00000027965	Olfm3	0.41689	5.32183	5.31915e-08	1.31954e-06
ENSMUSG00000022762	Ncam2	0.416493	5.89093	0.000130072	0.0014238
ENSMUSG00000000805	Car4	0.415658	4.38195	5.86281e-05	0.000718051
ENSMUSG00000027274	Mkks	0.415548	3.77162	0.000325114	0.00301911
ENSMUSG00000110357	A030001D20Rik	0.415185	3.10007	0.00376215	0.0223055
ENSMUSG00000118332	Fam220a	0.414762	5.24339	0.00392077	0.0230045
ENSMUSG00000052748	Swt1	0.414062	2.51769	0.00401989	0.0234842
ENSMUSG00000038473	Nos1ap	0.414036	5.03659	0.00040844	0.00366091
ENSMUSG00000018427	Ypel2	0.413632	5.72367	5.65942e-10	1.84924e-08
ENSMUSG00000038648	Creb3l2	0.413473	3.8423	0.000517637	0.00443598
ENSMUSG00000022629	Kif21a	0.412916	6.83801	6.21772e-07	1.26477e-05
ENSMUSG00000048732	Klhl11	0.412859	3.2933	0.00342898	0.020673
ENSMUSG00000027088	Phospho2	0.412721	4.63596	8.84639e-07	1.74674e-05
ENSMUSG00000049511	Htr1b	0.412044	3.57964	0.00436276	0.0249134
ENSMUSG00000042599	Kdm7a	0.411927	5.28013	8.35976e-06	0.00013096
ENSMUSG00000042743	Sgtb	0.410866	6.48257	1.62026e-10	5.67543e-09
ENSMUSG00000037369	Kdm6a	0.409696	4.66319	3.57423e-06	6.10128e-05
ENSMUSG00000022708	Zbtb20	0.409522	6.11783	1.01751e-05	0.000156128
ENSMUSG00000032556	Bfsp2	0.409002	3.07963	0.000863149	0.0067973
ENSMUSG00000041670	Rims1	0.408179	7.59825	8.1964e-10	2.62435e-08
ENSMUSG00000055540	Epha6	0.408138	3.66984	0.000574368	0.00483629
ENSMUSG00000026103	Gls	0.407396	8.02174	1.12853e-11	4.43163e-10
ENSMUSG00000007617	Homer1	0.406238	7.32459	2.75663e-06	4.81833e-05
ENSMUSG00000025757	Hspa4l	0.406034	6.92099	1.7378e-10	6.03884e-09
ENSMUSG00000021719	Rgs7bp	0.404776	7.97376	4.19164e-10	1.39038e-08
ENSMUSG00000051401	Kctd16	0.404414	3.61251	0.000530431	0.00452507
ENSMUSG00000038495	Otud7b	0.403984	5.15373	2.9117e-06	5.05908e-05
ENSMUSG00000023994	Nfya	0.403134	4.75445	1.86645e-05	0.000265981
ENSMUSG00000042680	Garem1	0.403085	4.33138	0.000348386	0.00319123
ENSMUSG00000121502	ENSMUSG00000121502	0.40299	2.32352	0.00891786	0.0439469
ENSMUSG00000039601	Rcan2	0.402868	6.89853	9.4794e-11	3.40908e-09
ENSMUSG00000022899	Slc15a2	0.402705	3.95923	0.000216321	0.00216742
ENSMUSG00000021448	Shc3	0.402597	4.87969	4.36506e-06	7.35093e-05
ENSMUSG00000024592	C330018D20Rik	0.40177	3.53325	0.000332883	0.0030782
ENSMUSG00000015829	Tnr	0.401588	7.76466	5.80442e-07	1.18652e-05
ENSMUSG00000036167	Pphln1	0.401254	5.03866	6.95997e-06	0.000110815
ENSMUSG00000053024	Cntn2	0.400328	5.84104	1.60493e-06	2.9557e-05
ENSMUSG00000021647	Cartpt	0.400328	3.69842	0.000332416	0.0030755
ENSMUSG00000026872	Zeb2	0.400277	6.90731	1.00175e-08	2.79373e-07
ENSMUSG00000022055	Nefl	0.398912	8.85374	1.47081e-10	5.19351e-09
ENSMUSG00000021451	Sema4d	0.398642	5.92039	7.62701e-07	1.53187e-05
ENSMUSG00000036745	Ttll7	0.39815	7.7105	8.26434e-12	3.29708e-10
ENSMUSG00000063317	Usp31	0.39643	6.29725	1.80069e-06	3.28855e-05
ENSMUSG00000031016	Wee1	0.396378	3.59335	0.00123662	0.00916162
ENSMUSG00000041298	Katnal1	0.395231	5.86114	8.56756e-07	1.69551e-05
ENSMUSG00000028842	Ago3	0.395079	5.34623	1.26365e-05	0.000189428
ENSMUSG00000049721	Gal3st1	0.39507	4.09692	0.000494629	0.00429486
ENSMUSG00000032737	Inppl1	0.39472	4.77893	6.30122e-06	0.000101527
ENSMUSG00000005580	Adcy9	0.394706	4.73949	0.000791124	0.00631241
ENSMUSG00000049858	Suox	0.394391	3.27919	0.00102015	0.00782007
ENSMUSG00000031274	Col4a5	0.394126	3.47526	0.00063444	0.00523884
ENSMUSG00000068696	Gpr88	0.393549	7.19876	9.63707e-05	0.00109671
ENSMUSG00000040836	Gpr161	0.393261	4.47788	0.000238241	0.00234018
ENSMUSG00000055782	Abcd2	0.392957	5.52188	5.45129e-09	1.58595e-07
ENSMUSG00000047712	Ust	0.392258	5.36677	1.79434e-08	4.84971e-07
ENSMUSG00000032883	Acsl3	0.391952	7.40777	9.81618e-09	2.74195e-07
ENSMUSG00000036617	Etl4	0.39099	6.29643	2.53486e-06	4.45739e-05
ENSMUSG00000119584	Rn18s-rs5	0.390881	10.9476	7.16153e-09	2.05282e-07
ENSMUSG00000045573	Penk	0.39045	6.93237	0.00131049	0.0095793
ENSMUSG00000033006	Sox10	0.390009	5.64998	1.31131e-08	3.61104e-07
ENSMUSG00000049044	Rapgef4	0.389958	7.39217	3.3834e-10	1.13519e-08
ENSMUSG00000045441	Gprin3	0.389375	3.59106	0.00749653	0.0381669
ENSMUSG00000037784	Dzip1l	0.388331	4.30668	1.62977e-05	0.000235437
ENSMUSG00000003119	Cdk12	0.388035	4.06469	0.00174395	0.0120583
ENSMUSG00000035898	Uba6	0.386748	4.16977	0.000500811	0.00432374
ENSMUSG00000001985	Grik3	0.386068	6.64736	0.000172211	0.00180389
ENSMUSG00000074766	Ism1	0.386014	2.71192	0.00423785	0.024415
ENSMUSG00000054715	Zscan22	0.38398	3.26266	0.00479064	0.0268582
ENSMUSG00000048279	Sacs	0.38377	6.51038	5.18664e-10	1.7011e-08
ENSMUSG00000039328	Rnf122	0.383679	3.60701	0.000178759	0.00185473
ENSMUSG00000002250	Ppard	0.383588	4.44888	0.000168165	0.00176574
ENSMUSG00000042903	Foxo4	0.383272	3.82828	0.000117542	0.0013021
ENSMUSG00000028412	Slc44a1	0.383212	6.28546	8.31363e-09	2.35989e-07
ENSMUSG00000057880	Abat	0.383187	8.53914	9.16675e-09	2.57699e-07
ENSMUSG00000047037	Nipa1	0.381213	5.65051	5.49752e-07	1.13275e-05
ENSMUSG00000036644	Tbc1d9b	0.38119	7.39092	2.03811e-10	6.98541e-09
ENSMUSG00000032285	Dnaja4	0.381151	4.95032	1.35612e-06	2.55388e-05
ENSMUSG00000025582	Nptx1	0.381022	7.65523	1.22688e-06	2.33955e-05
ENSMUSG00000038349	Plcl1	0.380393	4.4844	4.55156e-05	0.000576817
ENSMUSG00000020948	Klhl28	0.38031	4.68604	4.86709e-06	8.05692e-05
ENSMUSG00000026107	Nabp1	0.380235	3.1716	0.00419582	0.0242367
ENSMUSG00000055322	Tns1	0.380073	5.02986	0.000233753	0.00230256
ENSMUSG00000007682	Dio2	0.379736	7.23998	3.73735e-10	1.24441e-08
ENSMUSG00000030583	Sipa1l3	0.379669	5.6304	3.18987e-07	6.91428e-06
ENSMUSG00000036585	Fgf1	0.37938	5.22589	9.95476e-06	0.000153205
ENSMUSG00000026525	Opn3	0.379218	2.88624	0.0064712	0.0340632
ENSMUSG00000020696	Rffl	0.379051	2.94214	0.00820637	0.0411117
ENSMUSG00000006711	D130043K22Rik	0.378477	4.97976	0.000108222	0.0012088
ENSMUSG00000062785	Kcnc3	0.378193	6.32767	3.7392e-07	7.92837e-06
ENSMUSG00000015468	Notch4	0.377988	3.04753	0.00822531	0.0411931
ENSMUSG00000046351	Zfp322a	0.377984	5.43443	4.44071e-07	9.29206e-06
ENSMUSG00000055214	Pld5	0.377879	2.55069	0.00871386	0.0431827
ENSMUSG00000018846	Pank3	0.377275	6.39295	1.50565e-09	4.69215e-08
ENSMUSG00000061755	Bod1l	0.3767	6.13195	3.5088e-06	5.99542e-05
ENSMUSG00000031847	1700030J22Rik	0.376543	2.93448	0.00550993	0.0301095
ENSMUSG00000030701	Plekhb1	0.376321	6.46264	9.68771e-08	2.30844e-06
ENSMUSG00000024211	Grm8	0.376125	3.81134	0.00144015	0.010337
ENSMUSG00000051951	Xkr4	0.376081	3.5861	0.00269026	0.0171336
ENSMUSG00000033208	S100b	0.374406	6.02219	1.90808e-08	5.11762e-07
ENSMUSG00000019820	Utrn	0.374319	5.49246	8.08703e-05	0.0009474
ENSMUSG00000017376	Nlk	0.373929	6.65775	2.96244e-08	7.77874e-07
ENSMUSG00000041777	Cir1	0.372558	5.4352	3.27148e-07	7.07367e-06
ENSMUSG00000049176	Frmpd4	0.372152	6.0176	1.62992e-08	4.43268e-07
ENSMUSG00000038582	Pptc7	0.371233	5.53706	5.27484e-06	8.66637e-05
ENSMUSG00000031376	Atp2b3	0.371043	5.99026	1.35352e-06	2.55172e-05
ENSMUSG00000042529	Kcnj12	0.370862	2.97597	0.0056853	0.030856
ENSMUSG00000031700	Gpt2	0.37069	6.099	2.37275e-06	4.20186e-05
ENSMUSG00000117183	Gm20008	0.370288	2.58074	0.00783226	0.0395885
ENSMUSG00000036242	Armh4	0.370156	4.95022	1.75454e-05	0.000251259
ENSMUSG00000019883	Echdc1	0.370083	4.74493	3.0003e-05	0.000401124
ENSMUSG00000030087	Klf15	0.369575	4.35377	0.00188655	0.0128165
ENSMUSG00000038665	Dgki	0.36957	3.92136	0.0029172	0.0182667
ENSMUSG00000067369	Trmt2b	0.369373	3.05236	0.00159824	0.0112281
ENSMUSG00000056296	Synpr	0.368975	6.75273	5.15006e-07	1.06743e-05
ENSMUSG00000008226	Scrn3	0.368668	4.5294	0.000158778	0.00168128
ENSMUSG00000036985	Zdhhc9	0.368059	5.90076	4.44227e-08	1.12756e-06
ENSMUSG00000055421	Pcdh9	0.367848	7.11181	3.13069e-08	8.17152e-07
ENSMUSG00000020099	Unc5b	0.367664	3.74857	0.00718085	0.0370007
ENSMUSG00000070304	Scn2b	0.36744	7.77083	3.41938e-07	7.33011e-06
ENSMUSG00000056553	Ptprn2	0.367403	7.67669	7.76045e-10	2.48931e-08
ENSMUSG00000066129	Kndc1	0.366909	6.52092	3.58053e-07	7.62889e-06
ENSMUSG00000049791	Fzd4	0.366591	3.90991	0.000116446	0.0012916
ENSMUSG00000064367	mt-Nd5	0.36604	11.3845	0.00042952	0.00381665
ENSMUSG00000034570	Inpp5j	0.36556	5.67898	2.60079e-07	5.72239e-06
ENSMUSG00000085067	Gm15631	0.36516	3.22181	0.00334613	0.0202852
ENSMUSG00000090100	Ttbk2	0.364403	6.39178	4.99259e-06	8.24908e-05
ENSMUSG00000026034	Clk1	0.364093	5.91666	6.53775e-05	0.000790216
ENSMUSG00000033998	Kcnk1	0.362522	6.54548	1.82474e-08	4.92427e-07
ENSMUSG00000058402	Zfp420	0.361843	3.41074	0.00124408	0.00920134
ENSMUSG00000064354	mt-Co2	0.361716	8.21187	7.32539e-05	0.000871583
ENSMUSG00000058152	Chsy3	0.361499	3.33398	0.00992726	0.0477022
ENSMUSG00000064329	Scn1a	0.361253	6.70493	1.42522e-08	3.91244e-07
ENSMUSG00000039911	Spsb1	0.361	4.38507	0.00241356	0.0156966
ENSMUSG00000041220	Elovl6	0.360789	6.27672	4.33886e-05	0.000553063
ENSMUSG00000022790	Igsf11	0.360331	4.96538	8.42134e-05	0.000980516
ENSMUSG00000026173	Plcd4	0.360169	3.63079	0.00367941	0.0219412
ENSMUSG00000044674	Fzd1	0.360117	4.10435	0.000436346	0.00386553
ENSMUSG00000029657	Hsph1	0.36002	7.97846	2.25177e-07	5.03673e-06
ENSMUSG00000040606	Kazn	0.358909	6.37662	5.41423e-06	8.86213e-05
ENSMUSG00000038375	Trp53inp2	0.358908	8.14059	6.63683e-08	1.63026e-06
ENSMUSG00000038028	Tigar	0.35878	4.78939	1.08093e-05	0.000164192
ENSMUSG00000029676	Pot1a	0.357893	3.71156	0.00139736	0.0100879
ENSMUSG00000033849	B3galt2	0.357686	6.08476	9.31592e-05	0.00106779
ENSMUSG00000024867	Pip5k1b	0.35672	4.01715	0.00019237	0.001975
ENSMUSG00000044676	Zfp612	0.356699	5.44046	1.44913e-06	2.70576e-05
ENSMUSG00000005089	Slc1a2	0.356666	11.4374	3.29476e-09	9.81369e-08
ENSMUSG00000079184	Mphosph8	0.356099	5.63241	4.26506e-05	0.000545258
ENSMUSG00000048939	Atp13a5	0.355741	3.64423	0.000687994	0.00560704
ENSMUSG00000033595	Lgi3	0.355007	6.35414	5.1459e-09	1.5046e-07
ENSMUSG00000034858	Atosa	0.355005	5.44091	0.000236069	0.00232407
ENSMUSG00000025316	Banp	0.354754	4.45249	0.00165029	0.0115244
ENSMUSG00000015599	Ttbk1	0.354528	7.33737	5.28422e-07	1.09265e-05
ENSMUSG00000026640	Plxna2	0.354347	7.37776	2.3176e-06	4.11963e-05
ENSMUSG00000020634	Ubxn2a	0.353197	5.03796	4.42654e-05	0.000563009
ENSMUSG00000047495	Dlgap2	0.352859	5.60432	1.88503e-06	3.41765e-05
ENSMUSG00000023019	Gpd1	0.352811	5.52506	7.02361e-06	0.000111626
ENSMUSG00000037703	Lzts3	0.352356	6.88707	1.45951e-07	3.35899e-06
ENSMUSG00000034009	Rxfp1	0.352328	4.17242	0.000280638	0.00266551
ENSMUSG00000039835	Nhsl1	0.352024	5.11182	8.13843e-05	0.000952783
ENSMUSG00000044835	Ankrd45	0.352019	5.02088	7.85672e-05	0.000924749
ENSMUSG00000062901	Klhl24	0.351431	6.39213	5.30906e-09	1.54972e-07
ENSMUSG00000023921	Mmut	0.351281	4.71859	9.70539e-05	0.00110234
ENSMUSG00000076431	Sox4	0.35128	5.77307	6.13131e-06	9.888e-05
ENSMUSG00000102543	Pcdhgc5	0.350773	7.0181	4.23478e-08	1.08433e-06
ENSMUSG00000085438	Oip5os1	0.35072	8.93619	2.02983e-08	5.41103e-07
ENSMUSG00000048022	Tmem229a	0.349344	5.55357	1.85362e-06	3.36766e-05
ENSMUSG00000041915	Ammecr1l	0.349334	4.4921	0.000656803	0.00538794
ENSMUSG00000022136	Dnajc3	0.349249	6.0017	1.36616e-07	3.14829e-06
ENSMUSG00000109901	Chmp1b	0.349203	4.76443	3.97086e-05	0.000512495
ENSMUSG00000018548	Trim37	0.348936	8.28568	1.39514e-08	3.83587e-07
ENSMUSG00000034617	Mtrr	0.348718	3.05249	0.00483009	0.0270432
ENSMUSG00000035936	Aldh5a1	0.348461	6.77257	4.81054e-07	1.0018e-05
ENSMUSG00000029638	Glcci1	0.348386	4.76348	0.00263464	0.0168405
ENSMUSG00000029674	Limk1	0.348136	5.75692	1.58709e-06	2.92593e-05
ENSMUSG00000032652	Crebl2	0.348026	3.94981	0.000500906	0.00432374
ENSMUSG00000074733	Zfp950	0.347435	3.36352	0.00935966	0.045655
ENSMUSG00000035078	Mtmr9	0.347246	5.4493	3.44033e-06	5.89569e-05
ENSMUSG00000096458	Moap1	0.347223	4.09413	0.00336913	0.0203894
ENSMUSG00000064065	Ipcef1	0.3472	6.65879	8.87588e-08	2.13533e-06
ENSMUSG00000033618	Map3k13	0.346624	4.57261	0.000826045	0.00654631
ENSMUSG00000036019	Tmtc2	0.346618	3.31103	0.00700158	0.0362889
ENSMUSG00000025766	D3Ertd751e	0.346494	3.55872	0.00385294	0.0227283
ENSMUSG00000028243	Ubxn2b	0.34645	5.60164	1.51151e-05	0.000220973
ENSMUSG00000041245	Wnk3	0.346196	4.04807	0.00108736	0.00822989
ENSMUSG00000031558	Slit2	0.346086	5.20021	8.63732e-05	0.000997192
ENSMUSG00000055725	Paqr3	0.345431	2.77855	0.00748571	0.0381451
ENSMUSG00000005125	Ndrg1	0.345364	4.84925	0.000144452	0.00155844
ENSMUSG00000039830	Olig2	0.34497	5.26109	3.80979e-06	6.48442e-05
ENSMUSG00000059839	Zfp874b	0.344653	3.8072	0.00695826	0.0361124
ENSMUSG00000030469	Zfp719	0.344334	4.18042	0.000197695	0.00201656
ENSMUSG00000060477	Irak2	0.344236	3.77799	0.0024816	0.0160498
ENSMUSG00000038174	Hycc2	0.343948	6.34941	2.02731e-05	0.00028611
ENSMUSG00000045967	Gpr158	0.343754	7.41113	2.2005e-08	5.83932e-07
ENSMUSG00000022342	Kcnv1	0.343188	6.38066	3.58334e-08	9.25644e-07
ENSMUSG00000038039	Gcc2	0.342843	6.09785	4.56812e-07	9.54726e-06
ENSMUSG00000043635	Adamts3	0.342703	4.03166	0.00251114	0.016187
ENSMUSG00000067279	Ppp1r3c	0.342684	4.91006	3.75376e-05	0.000488798
ENSMUSG00000022957	Itsn1	0.342403	6.95642	1.24041e-06	2.36136e-05
ENSMUSG00000029385	Ccng2	0.342209	5.08923	9.89997e-06	0.000152662
ENSMUSG00000023022	Lima1	0.34154	4.02777	0.0011011	0.00831951
ENSMUSG00000034210	Efcab14	0.341486	5.11505	4.72361e-06	7.85653e-05
ENSMUSG00000028483	Snapc3	0.341351	3.64236	0.00126579	0.00933038
ENSMUSG00000044968	Napepld	0.341334	3.63952	0.00216396	0.0143831
ENSMUSG00000026339	Ccdc93	0.341292	4.864	4.98736e-05	0.000623672
ENSMUSG00000046312	Myorg	0.341012	5.62429	1.87381e-07	4.25103e-06
ENSMUSG00000014039	Prdm15	0.34099	3.96372	0.00082861	0.00656071
ENSMUSG00000047414	Flrt2	0.340592	6.23583	4.52677e-08	1.14569e-06
ENSMUSG00000040147	Maob	0.340434	3.96173	0.00105975	0.00804525
ENSMUSG00000018666	Cbx1	0.340004	4.11457	0.00021064	0.0021202
ENSMUSG00000010554	Mettl16	0.339737	4.68679	0.0103441	0.0492677
ENSMUSG00000063415	Cyp26b1	0.338699	4.47952	0.00285409	0.0179356
ENSMUSG00000033066	Gas7	0.33868	7.31573	7.39851e-08	1.7947e-06
ENSMUSG00000035093	Secisbp2l	0.338157	7.31716	2.09191e-06	3.75386e-05
ENSMUSG00000025823	Pdia4	0.338147	5.29494	0.000551598	0.0046783
ENSMUSG00000035033	Tbr1	0.337624	6.65456	1.42389e-05	0.000209917
ENSMUSG00000033009	Ogfod1	0.337611	6.38538	5.67177e-07	1.16454e-05
ENSMUSG00000030643	Rab30	0.337375	4.9212	8.04299e-05	0.000943503
ENSMUSG00000044043	Pcdhb14	0.336926	3.1504	0.00679437	0.0354157
ENSMUSG00000021234	Fam161b	0.336824	3.76084	0.00202717	0.0136331
ENSMUSG00000025986	Slc39a10	0.336812	7.63569	2.33497e-09	7.07522e-08
ENSMUSG00000024754	Cemip2	0.336552	4.43639	0.000275333	0.00262075
ENSMUSG00000035671	Zswim4	0.336505	4.20599	0.000262286	0.00252261
ENSMUSG00000001089	Luzp1	0.335799	6.12561	3.26468e-05	0.000431203
ENSMUSG00000028176	Lrrc7	0.335625	6.00076	2.72462e-05	0.000368772
ENSMUSG00000037855	Zfp365	0.335609	8.3161	1.68507e-07	3.84777e-06
ENSMUSG00000019907	Ppp1r12a	0.335494	5.49946	2.39305e-05	0.000330535
ENSMUSG00000113184	Gm49654	0.335434	3.76437	0.00941309	0.0458201
ENSMUSG00000032238	Rora	0.335383	5.47457	0.00010467	0.00117437
ENSMUSG00000041559	Fmod	0.335318	4.84225	0.00573881	0.0310556
ENSMUSG00000000787	Ddx3x	0.334719	7.92799	2.85494e-06	4.97032e-05
ENSMUSG00000026623	Lpgat1	0.334314	7.74164	1.87868e-08	5.05426e-07
ENSMUSG00000037999	Arap2	0.334292	6.0462	2.67187e-06	4.67483e-05
ENSMUSG00000030306	Tmtc1	0.334242	6.24835	5.71081e-07	1.17118e-05
ENSMUSG00000022505	Emp2	0.334161	5.06026	0.000488442	0.00425178
ENSMUSG00000065954	Tacc1	0.333685	7.2317	1.67959e-07	3.84026e-06
ENSMUSG00000042671	Rgs8	0.333674	6.31927	9.91593e-08	2.35004e-06
ENSMUSG00000040167	Ikzf5	0.333613	4.82242	4.01997e-05	0.00051769
ENSMUSG00000041688	Amot	0.333163	4.74268	3.51318e-05	0.000461589
ENSMUSG00000022761	Lztr1	0.332961	7.02649	2.40611e-07	5.33425e-06
ENSMUSG00000024077	Strn	0.332894	6.81421	2.46523e-05	0.000338902
ENSMUSG00000002222	Rmnd5a	0.3323	6.993	3.89182e-08	1.0009e-06
ENSMUSG00000051671	Coa6	0.332078	3.6574	0.00341307	0.0206163
ENSMUSG00000036800	Fam135b	0.33181	5.66802	0.000192679	0.00197691
ENSMUSG00000048000	Gigyf2	0.331759	6.06851	3.98694e-06	6.75306e-05
ENSMUSG00000031202	Rab39b	0.331556	5.65744	1.75918e-06	3.2161e-05
ENSMUSG00000022514	Il1rap	0.331331	4.80477	0.000193203	0.0019799
ENSMUSG00000034648	Lrrn1	0.33084	6.04456	1.86077e-06	3.37716e-05
ENSMUSG00000060771	Tsga10	0.33063	3.72374	0.00341369	0.0206163
ENSMUSG00000087141	Plcxd2	0.330116	6.81329	2.43818e-05	0.000335974
ENSMUSG00000031543	Ank1	0.330018	5.22667	0.000260333	0.00250935
ENSMUSG00000024892	Pcx	0.330012	5.85791	1.88705e-07	4.27552e-06
ENSMUSG00000024524	Gnal	0.329937	7.84926	7.42148e-07	1.49746e-05
ENSMUSG00000021613	Hapln1	0.329657	6.19986	7.24281e-08	1.75937e-06
ENSMUSG00000020988	L2hgdh	0.329503	3.7928	0.00255556	0.016425
ENSMUSG00000030729	Pgm2l1	0.329476	9.18316	5.02528e-08	1.25196e-06
ENSMUSG00000014498	Ankrd52	0.329386	6.36778	0.000452666	0.00398993
ENSMUSG00000001833	Septin7	0.329227	8.59765	7.9905e-07	1.59573e-05
ENSMUSG00000031984	2810004N23Rik	0.329047	3.84115	0.0015743	0.0110866
ENSMUSG00000028444	Cntfr	0.328608	5.53179	2.49376e-06	4.39393e-05
ENSMUSG00000002808	Epdr1	0.328316	5.77884	3.34984e-07	7.21637e-06
ENSMUSG00000049658	Bdp1	0.327974	5.08984	0.000122678	0.00135131
ENSMUSG00000049421	Zfp260	0.327821	5.91333	1.19905e-07	2.7963e-06
ENSMUSG00000040268	Plekha1	0.327585	6.72704	4.69445e-07	9.7996e-06
ENSMUSG00000024176	Sox8	0.32692	5.66215	2.29221e-05	0.000319124
ENSMUSG00000054555	Adam12	0.326577	3.55128	0.00374452	0.0222526
ENSMUSG00000071753	Cdr1os	0.326569	6.04728	0.00100328	0.00772531
ENSMUSG00000035011	Zbtb7a	0.32648	6.13466	0.00030773	0.00288872
ENSMUSG00000032872	Cyb5r4	0.326325	5.08934	2.59732e-05	0.000353453
ENSMUSG00000012609	Ttll5	0.325515	4.54005	0.000177948	0.00184752
ENSMUSG00000038370	Pcp4l1	0.325266	6.54613	8.38783e-05	0.000977408
ENSMUSG00000022765	Snap29	0.325226	5.14386	0.000196223	0.00200505
ENSMUSG00000070544	Top1	0.325215	6.51999	1.72952e-05	0.000248082
ENSMUSG00000037679	Inf2	0.325108	6.26654	7.97254e-05	0.000937751
ENSMUSG00000046567	Rlig1	0.324925	4.05008	0.000592305	0.00495634
ENSMUSG00000022231	Sema5a	0.3247	6.07068	1.94058e-05	0.000275022
ENSMUSG00000064373	Selenop	0.32468	8.05199	6.07242e-06	9.80206e-05
ENSMUSG00000031932	Gpr83	0.324605	4.92161	0.00570997	0.030938
ENSMUSG00000064345	mt-Nd2	0.324525	11.7593	0.000231057	0.00228758
ENSMUSG00000046311	Zfp62	0.324231	5.05988	1.0099e-05	0.000155288
ENSMUSG00000021097	Clmn	0.324085	5.6533	0.000244274	0.00238341
ENSMUSG00000055240	Zfp101	0.323906	3.27617	0.00413233	0.0239252
ENSMUSG00000053141	Ptprt	0.321878	7.39206	4.28266e-08	1.09339e-06
ENSMUSG00000030102	Itpr1	0.321857	7.49757	3.6309e-05	0.000476341
ENSMUSG00000031990	Jam3	0.321706	4.5564	0.000124914	0.00137248
ENSMUSG00000026510	Trp53bp2	0.321652	4.66528	0.00049744	0.00430443
ENSMUSG00000024817	Uhrf2	0.321536	5.19979	0.000119852	0.00132435
ENSMUSG00000030270	Cpne9	0.320244	3.78275	0.00451693	0.0256018
ENSMUSG00000019990	Pde7b	0.320242	4.62594	0.00104673	0.0079845
ENSMUSG00000027598	Itch	0.319717	5.64549	6.34868e-06	0.000102104
ENSMUSG00000058656	Samd12	0.319636	5.8297	0.000207262	0.0020886
ENSMUSG00000025907	Rb1cc1	0.318873	6.45425	1.51099e-06	2.80037e-05
ENSMUSG00000032500	Dclk3	0.318073	5.40762	0.000479275	0.00418655
ENSMUSG00000059213	Ddn	0.317899	9.32777	1.35005e-06	2.54793e-05
ENSMUSG00000069769	Msi2	0.317894	6.52773	7.73139e-06	0.000121769
ENSMUSG00000007656	Arpp19	0.317389	7.75961	5.61811e-07	1.15488e-05
ENSMUSG00000027827	Kcnab1	0.317357	6.50583	0.000595747	0.00497327
ENSMUSG00000036095	Dgkb	0.317116	6.92487	0.000159184	0.00168254
ENSMUSG00000020521	Rnft1	0.317043	3.78095	0.00142992	0.0102806
ENSMUSG00000063894	Zkscan8	0.316594	4.27641	0.00146221	0.0104613
ENSMUSG00000022292	Rrm2b	0.316541	4.73054	0.000192971	0.00197874
ENSMUSG00000024999	Noc3l	0.316511	3.70649	0.00325696	0.0198754
ENSMUSG00000111375	Btbd8	0.315851	7.03648	6.61544e-07	1.34412e-05
ENSMUSG00000035168	Tanc1	0.315605	4.35894	0.000320161	0.00298385
ENSMUSG00000041229	Phf8	0.315574	4.89405	0.00148886	0.0106302
ENSMUSG00000037712	Fermt2	0.315447	5.92789	7.50247e-07	1.50859e-05
ENSMUSG00000028528	Dnajc6	0.315356	8.26548	8.24674e-07	1.64316e-05
ENSMUSG00000049327	Kmt5a	0.315289	5.2319	0.00319145	0.0195323
ENSMUSG00000024276	Zfp397	0.315216	4.93186	0.00057808	0.00485587
ENSMUSG00000040111	Gramd1b	0.314968	7.75447	4.73762e-06	7.87237e-05
ENSMUSG00000019763	Rmnd1	0.314712	4.42505	0.00174956	0.0120922
ENSMUSG00000000804	Usp32	0.314608	6.96574	8.53175e-08	2.06104e-06
ENSMUSG00000047881	Rell1	0.314353	3.91159	0.00143352	0.0102981
ENSMUSG00000019873	Reep3	0.314133	5.45623	0.000249498	0.00241955
ENSMUSG00000015714	Cers2	0.313957	5.86229	7.39607e-07	1.49406e-05
ENSMUSG00000048706	Lurap1l	0.313937	3.38071	0.0091832	0.0449761
ENSMUSG00000039714	Cplx3	0.313111	4.5693	0.00361766	0.0216319
ENSMUSG00000000056	Narf	0.312992	6.229	0.000117327	0.00130054
ENSMUSG00000097604	Gm17322	0.311727	4.2969	0.00184741	0.0126044
ENSMUSG00000020441	2310033P09Rik	0.31169	3.82895	0.00293319	0.0183537
ENSMUSG00000032575	Manf	0.311581	5.33404	1.99112e-05	0.000281569
ENSMUSG00000029227	Fip1l1	0.311515	6.12025	5.78961e-06	9.40624e-05
ENSMUSG00000010803	Gabra1	0.311373	8.31822	5.98992e-07	1.2227e-05
ENSMUSG00000017778	Cox7c	0.311354	7.41356	3.53227e-07	7.5444e-06
ENSMUSG00000022200	Golph3	0.311306	6.53627	1.84418e-07	4.18922e-06
ENSMUSG00000027004	Frzb	0.311133	3.92393	0.0015497	0.0109507
ENSMUSG00000009828	Cilk1	0.310824	5.31575	1.14738e-05	0.000173384
ENSMUSG00000026781	Acbd5	0.310808	6.31086	1.49422e-06	2.77789e-05
ENSMUSG00000048707	Tprn	0.310731	3.86638	0.00155	0.0109507
ENSMUSG00000016382	Pls3	0.310725	7.14516	6.71674e-08	1.64527e-06
ENSMUSG00000019699	Akt3	0.31001	7.65335	1.30477e-06	2.47046e-05
ENSMUSG00000024135	Srbd1	0.309998	3.39588	0.00494057	0.0275834
ENSMUSG00000030660	Pik3c2a	0.309909	4.62417	0.00198908	0.0134142
ENSMUSG00000070565	Rasal2	0.309667	6.49002	1.35161e-05	0.000200022
ENSMUSG00000057766	Ankrd29	0.309268	4.2806	0.00126254	0.00931428
ENSMUSG00000033083	Tbc1d4	0.309248	3.20054	0.00954794	0.046294
ENSMUSG00000034731	Dgkh	0.309088	6.68085	3.41834e-07	7.33011e-06
ENSMUSG00000022122	Ednrb	0.308866	6.2549	0.000153838	0.00163988
ENSMUSG00000034751	Mast4	0.308824	5.16823	0.00409522	0.0237732
ENSMUSG00000033883	Zfp267	0.3088	4.61104	0.000194793	0.00199276
ENSMUSG00000036158	Prickle1	0.308668	6.1655	7.66975e-06	0.000120991
ENSMUSG00000037426	Depdc5	0.308528	5.49076	2.4855e-05	0.000340697
ENSMUSG00000049504	Proser1	0.308204	4.58658	0.0007467	0.00601274
ENSMUSG00000020954	Strn3	0.307974	5.53293	7.60298e-05	0.000900329
ENSMUSG00000038708	Golga4	0.307528	6.22953	7.2738e-05	0.000866621
ENSMUSG00000027534	Snx16	0.307359	5.20755	1.27719e-05	0.000191186
ENSMUSG00000074305	Peak1	0.307134	5.09732	0.00070571	0.00572743
ENSMUSG00000042444	Mindy2	0.306992	6.16592	1.46366e-06	2.72998e-05
ENSMUSG00000014905	Dnajb9	0.306812	5.46369	3.95316e-06	6.70887e-05
ENSMUSG00000049252	Lrp1b	0.306383	5.28109	0.000307292	0.00288872
ENSMUSG00000021470	Ercc6l2	0.30616	3.65457	0.00487642	0.0272687
ENSMUSG00000028289	Epha7	0.305957	5.9742	1.49249e-05	0.000218923
ENSMUSG00000026131	Dst	0.305839	8.32709	5.34949e-05	0.000662586
ENSMUSG00000026837	Col5a1	0.305789	5.0583	0.000148933	0.0015962
ENSMUSG00000033174	Mgll	0.305677	7.47557	4.04742e-08	1.03787e-06
ENSMUSG00000032393	Dpp8	0.305534	7.04415	5.10003e-06	8.41073e-05
ENSMUSG00000046753	Ccdc66	0.305434	3.49196	0.00591567	0.0318497
ENSMUSG00000009406	Elk1	0.305431	5.73135	1.91184e-05	0.000271785
ENSMUSG00000031231	Cox7b	0.304804	7.06424	2.30485e-07	5.13576e-06
ENSMUSG00000096914	Galntl6	0.304652	4.70544	0.000496713	0.00430026
ENSMUSG00000028383	Hsdl2	0.304599	4.85361	0.000215674	0.00216218
ENSMUSG00000027347	Rasgrp1	0.304569	8.5841	2.42334e-05	0.000334191
ENSMUSG00000031104	Rab33a	0.30448	4.34967	0.000281715	0.00267278
ENSMUSG00000029776	Hibadh	0.304288	5.31305	5.76174e-06	9.36965e-05
ENSMUSG00000034336	Ina	0.304257	7.61734	1.29197e-07	2.99702e-06
ENSMUSG00000041258	Zfp236	0.304254	5.35501	0.000282851	0.00268211
ENSMUSG00000031714	Gab1	0.303843	4.40765	0.000839428	0.00663137
ENSMUSG00000031760	Mt3	0.303817	7.68277	0.000570649	0.0048177
ENSMUSG00000020326	Ccng1	0.303288	5.94264	1.43023e-06	2.67332e-05
ENSMUSG00000026028	Trak2	0.303215	7.87038	7.16863e-06	0.000113621
ENSMUSG00000017412	Cacnb4	0.302749	7.56483	0.00034083	0.00313688
ENSMUSG00000017978	Cadps2	0.302562	6.27872	2.77806e-05	0.000374945
ENSMUSG00000031197	Vbp1	0.302504	5.96586	1.94288e-06	3.50438e-05
ENSMUSG00000001774	Chordc1	0.302353	6.05672	1.0712e-05	0.000163139
ENSMUSG00000021379	Id4	0.302162	5.97807	5.37419e-05	0.000663309
ENSMUSG00000021699	Pde4d	0.301796	4.88114	0.000141342	0.00152995
ENSMUSG00000047787	Flrt1	0.301758	4.4183	0.00433379	0.0247856
ENSMUSG00000035901	Dennd5a	0.301693	7.63645	8.83457e-08	2.12832e-06
ENSMUSG00000090150	Acad11	0.301345	4.68194	0.000220995	0.00220541
ENSMUSG00000056919	Cep162	0.300702	3.61661	0.00749272	0.0381669
ENSMUSG00000025777	Gdap1	0.30067	7.0561	3.9805e-07	8.38922e-06
ENSMUSG00000029055	Plch2	0.300666	5.75426	0.000130351	0.00142508
ENSMUSG00000066232	Ipo7	0.300648	6.96582	3.22088e-05	0.000427353
ENSMUSG00000002846	Timmdc1	0.300471	3.97019	0.00125442	0.00926613
ENSMUSG00000008658	Rbfox1	0.300422	7.47448	4.72893e-05	0.000597565
ENSMUSG00000039178	Tbc1d19	0.300132	4.49796	0.000376957	0.00340742
ENSMUSG00000026675	Hsd17b7	0.300087	4.5465	0.00508986	0.0282727
ENSMUSG00000034275	Igsf9b	0.299514	6.56766	0.000385675	0.00347822
ENSMUSG00000058248	Kcnh1	0.29884	6.31816	0.000133498	0.00145313
ENSMUSG00000022601	Zbtb11	0.298832	5.16686	0.000435387	0.00386095
ENSMUSG00000026740	Dnajc1	0.29853	4.40604	0.00236174	0.015466
ENSMUSG00000025370	Cdh9	0.298414	4.25502	0.00432056	0.0247531
ENSMUSG00000025203	Scd2	0.298258	10.1306	9.47287e-07	1.84753e-05
ENSMUSG00000032382	Snx1	0.297831	5.5471	3.20834e-05	0.000426334
ENSMUSG00000030016	Zfp638	0.296729	6.45049	1.58302e-06	2.9215e-05
ENSMUSG00000003731	Kpna6	0.296708	6.77379	1.18024e-06	2.26157e-05
ENSMUSG00000031538	Plat	0.296623	5.65858	0.000679764	0.00554513
ENSMUSG00000013275	Slc41a1	0.296579	6.39793	1.29438e-05	0.000192935
ENSMUSG00000026788	Zbtb43	0.296562	4.92553	9.81664e-05	0.00111353
ENSMUSG00000024127	Prepl	0.296073	8.14617	1.47029e-06	2.73943e-05
ENSMUSG00000015224	Cyp2j9	0.295475	4.03146	0.00273081	0.0173351
ENSMUSG00000040003	Magi2	0.295172	6.54826	8.51147e-06	0.000133098
ENSMUSG00000063281	Zfp35	0.29493	4.41021	0.00333832	0.0202449
ENSMUSG00000055053	Nfic	0.294926	6.18639	6.78993e-05	0.000818436
ENSMUSG00000024556	Me2	0.294449	3.97224	0.00233776	0.0153404
ENSMUSG00000047804	Akap10	0.294375	4.05668	0.00455984	0.0257866
ENSMUSG00000061759	Armt1	0.29402	3.99004	0.00256354	0.0164582
ENSMUSG00000035275	Raver2	0.293414	4.90435	0.000360639	0.00327435
ENSMUSG00000026437	Cdk18	0.293378	4.303	0.0021308	0.0141789
ENSMUSG00000006390	Elovl1	0.292768	4.08831	0.00140206	0.0101177
ENSMUSG00000053199	Arhgap20	0.292699	6.57752	7.46987e-07	1.50549e-05
ENSMUSG00000041417	Pik3r1	0.292652	7.36238	1.26437e-05	0.000189428
ENSMUSG00000020864	Ankrd40	0.292649	6.67413	2.63957e-06	4.62756e-05
ENSMUSG00000040520	Manea	0.292614	5.14872	0.000608205	0.00505192
ENSMUSG00000071528	Atp5mk	0.29256	7.20486	0.000233449	0.00230086
ENSMUSG00000024780	Cdc37l1	0.2923	6.70865	4.43838e-06	7.45291e-05
ENSMUSG00000025006	Sorbs1	0.292103	5.22046	0.00174224	0.0120512
ENSMUSG00000028328	Tmod1	0.291734	4.9033	0.00787841	0.0397759
ENSMUSG00000037112	Sik2	0.291181	4.50453	0.0021789	0.014466
ENSMUSG00000048960	Prex2	0.290758	5.81666	0.000410391	0.00367464
ENSMUSG00000038497	Tmco3	0.29045	4.97205	0.0010129	0.00777044
ENSMUSG00000062908	Acadm	0.29004	4.58655	0.00105027	0.00800109
ENSMUSG00000041895	Wipi1	0.289945	4.03058	0.004676	0.0263414
ENSMUSG00000020102	Slc16a7	0.289789	6.44184	1.94089e-05	0.000275022
ENSMUSG00000022763	Aifm3	0.289789	4.12686	0.00428407	0.0246239
ENSMUSG00000054280	Prr14l	0.289664	5.64355	0.000472368	0.00414274
ENSMUSG00000024948	Map4k2	0.289588	5.06184	0.00034012	0.00313354
ENSMUSG00000022139	Mbnl2	0.289251	7.50207	3.14845e-05	0.000419331
ENSMUSG00000027709	Mccc1	0.289097	3.57257	0.0057896	0.031267
ENSMUSG00000020273	Papolg	0.288982	4.25617	0.00179787	0.0123391
ENSMUSG00000000792	Slc5a5	0.288889	3.92442	0.00406883	0.023678
ENSMUSG00000037172	Dennd11	0.28873	6.03632	0.000188443	0.00194254
ENSMUSG00000055116	Bmal1	0.288033	4.6478	0.000409995	0.00367297
ENSMUSG00000020640	Itsn2	0.287344	4.83509	0.000667177	0.00545261
ENSMUSG00000028402	Mpdz	0.28689	5.49303	0.000101738	0.00114615
ENSMUSG00000040339	Eeig2	0.286772	6.01314	0.000173077	0.00180864
ENSMUSG00000024302	Dtna	0.286359	6.90554	1.61334e-06	2.96807e-05
ENSMUSG00000000308	Ckmt1	0.285922	7.53375	6.9259e-05	0.000831393
ENSMUSG00000042662	Dusp15	0.285878	4.62561	0.00112444	0.00845215
ENSMUSG00000096054	Syne1	0.285742	8.31796	0.000100949	0.00114021
ENSMUSG00000017119	Nbr1	0.284988	7.21026	3.94498e-07	8.32439e-06
ENSMUSG00000020181	Nav3	0.284891	7.5585	8.54054e-06	0.000133315
ENSMUSG00000048537	Phldb1	0.284567	6.22282	5.53649e-05	0.00068142
ENSMUSG00000021614	Vcan	0.284131	5.12583	0.000691448	0.00562733
ENSMUSG00000009030	Pdcl	0.284114	4.56509	0.00133412	0.00970343
ENSMUSG00000035133	Arhgap5	0.283493	6.74615	7.34321e-06	0.000116283
ENSMUSG00000027309	Dnaaf9	0.283359	6.56904	2.95272e-06	5.11513e-05
ENSMUSG00000046160	Olig1	0.282442	7.24897	2.33766e-06	4.1439e-05
ENSMUSG00000025509	Pnpla2	0.282235	4.2043	0.0067024	0.0350825
ENSMUSG00000041912	Tdrkh	0.281742	5.2084	0.000626927	0.00518658
ENSMUSG00000061601	Pclo	0.28122	7.56683	8.44258e-06	0.000132139
ENSMUSG00000035390	Brsk1	0.280797	8.00669	8.27126e-07	1.64617e-05
ENSMUSG00000020482	Ccdc117	0.28077	3.71472	0.00947425	0.0460155
ENSMUSG00000022263	Trio	0.280284	7.12978	0.000117862	0.00130448
ENSMUSG00000041935	Rimoc1	0.280071	6.08552	4.39247e-05	0.000559083
ENSMUSG00000029153	Ociad2	0.279988	5.94953	0.00317198	0.0194487
ENSMUSG00000027582	Zgpat	0.279938	5.21177	0.000469501	0.00411966
ENSMUSG00000041992	Rapgef5	0.279638	6.87711	2.42394e-06	4.27953e-05
ENSMUSG00000021700	Rab3c	0.279634	8.72257	0.000130902	0.00142931
ENSMUSG00000057060	Slc35f3	0.279462	4.66333	0.00369506	0.022027
ENSMUSG00000030237	Slco1a4	0.279413	4.71006	0.00876516	0.0433653
ENSMUSG00000047466	Ark2n	0.279099	4.62823	0.00186124	0.0126839
ENSMUSG00000058388	Phtf1	0.278868	5.26303	0.000280644	0.00266551
ENSMUSG00000028034	Fubp1	0.278447	6.46551	0.000101361	0.00114311
ENSMUSG00000108621	Gm33989	0.278101	4.43721	0.00515112	0.0285406
ENSMUSG00000024347	Psd2	0.277952	5.43959	0.000423332	0.00376549
ENSMUSG00000002428	Hltf	0.277817	4.24729	0.00367158	0.0219019
ENSMUSG00000011427	Zfp790	0.277785	3.81433	0.0090721	0.0445691
ENSMUSG00000025780	Itih5	0.277645	5.30497	0.00537963	0.0295079
ENSMUSG00000031605	Klhl2	0.277621	7.41036	0.000254449	0.00245804
ENSMUSG00000064339	mt-Rnr2	0.277586	12.089	1.38729e-05	0.000205038
ENSMUSG00000042331	Specc1	0.277367	6.08261	8.00667e-05	0.000939872
ENSMUSG00000042271	Nxt2	0.277134	4.74072	0.000755877	0.00607547
ENSMUSG00000021244	Ylpm1	0.276998	6.48115	0.000135119	0.00146895
ENSMUSG00000118669	Arvcf	0.276939	5.19357	0.000573519	0.00483612
ENSMUSG00000037325	Bbs7	0.276834	3.82079	0.00925366	0.0452453
ENSMUSG00000031523	Dlc1	0.276476	5.86203	0.00283136	0.0178376
ENSMUSG00000033278	Ptprm	0.276363	4.99096	0.00125422	0.00926613
ENSMUSG00000020261	Slc36a1	0.276239	6.34847	8.65869e-06	0.000134798
ENSMUSG00000040276	Pacsin1	0.276087	8.27916	2.14278e-05	0.000300229
ENSMUSG00000027663	Zmat3	0.276053	6.88149	8.56522e-05	0.000992138
ENSMUSG00000045589	Frrs1l	0.276001	8.02076	0.000215586	0.00216218
ENSMUSG00000037348	Paqr7	0.275894	5.66836	0.00227603	0.0149971
ENSMUSG00000001829	Clpb	0.275676	5.38044	3.88723e-05	0.000503929
ENSMUSG00000042700	Sipa1l1	0.275639	7.88857	9.84299e-06	0.000152154
ENSMUSG00000028982	Slc25a33	0.275574	4.97578	0.000568428	0.00480358
ENSMUSG00000051335	Gfod1	0.275443	6.23261	0.00333023	0.020209
ENSMUSG00000032038	St3gal4	0.275273	4.23911	0.00483042	0.0270432
ENSMUSG00000022112	Gpc5	0.27477	4.94821	0.000464317	0.00407825
ENSMUSG00000028080	Lrba	0.274744	4.54073	0.00746636	0.0380798
ENSMUSG00000044068	Zrsr2-ps1	0.27468	5.6274	0.000262535	0.00252261
ENSMUSG00000068747	Sort1	0.274537	8.69183	3.14854e-06	5.42751e-05
ENSMUSG00000056429	Tgoln1	0.274268	7.05122	2.12878e-05	0.000299108
ENSMUSG00000054720	Lrrc8c	0.274183	4.82325	0.00055514	0.00470379
ENSMUSG00000002032	Tmem25	0.27369	5.02953	0.000575625	0.00484221
ENSMUSG00000031666	Rbl2	0.273257	5.21497	0.000648774	0.00532457
ENSMUSG00000004151	Etv1	0.273208	6.54717	4.7168e-05	0.000596462
ENSMUSG00000078591	Hs3st4	0.273049	6.3938	0.00020218	0.00205037
ENSMUSG00000086040	Wipf3	0.272798	7.15648	0.00523655	0.0289133
ENSMUSG00000001552	Jup	0.272623	5.04607	0.000713536	0.00577222
ENSMUSG00000020262	Adarb1	0.272573	7.29303	8.52057e-05	0.000988807
ENSMUSG00000062078	Qki	0.272488	8.1624	9.67039e-05	0.00109907
ENSMUSG00000027351	Spred1	0.272273	7.1592	0.000242823	0.00237057
ENSMUSG00000030313	Dennd5b	0.272226	6.17615	0.0001302	0.00142431
ENSMUSG00000045095	Magi1	0.272129	6.63877	1.85367e-05	0.000264589
ENSMUSG00000042429	Adora1	0.271832	7.99526	2.38096e-05	0.000329125
ENSMUSG00000042523	Dnal1	0.271741	7.17647	2.8371e-06	4.94417e-05
ENSMUSG00000004032	Gstm5	0.271544	6.7435	5.36263e-05	0.000662865
ENSMUSG00000035189	Ano4	0.271513	4.25753	0.00278311	0.0176287
ENSMUSG00000037754	Ppp1r16b	0.271351	6.5301	0.000782674	0.00625639
ENSMUSG00000053646	Plxnb1	0.271343	6.21473	6.5212e-05	0.00078985
ENSMUSG00000096910	Zfp955b	0.271316	5.18821	0.000324638	0.00301629
ENSMUSG00000018398	Septin8	0.271096	8.18576	3.49677e-06	5.98071e-05
ENSMUSG00000029772	Ahcyl2	0.271089	6.73914	4.92171e-05	0.0006188
ENSMUSG00000024579	Pcyox1l	0.270628	4.14562	0.00389546	0.0228867
ENSMUSG00000022840	Adcy5	0.27048	7.7715	0.0028378	0.01786
ENSMUSG00000000416	Cttnbp2	0.269918	6.21757	4.25593e-05	0.000544871
ENSMUSG00000041341	Atg2b	0.269641	5.0633	0.00571694	0.0309606
ENSMUSG00000001687	Ubl3	0.269636	6.81368	2.8783e-05	0.000387178
ENSMUSG00000026778	Prkcq	0.26954	4.10539	0.00700579	0.0362909
ENSMUSG00000026421	Csrp1	0.269459	6.8879	0.000113214	0.00126134
ENSMUSG00000074657	Kif5a	0.2694	10.4427	0.000313944	0.00293405
ENSMUSG00000038633	Degs1	0.269178	6.14321	3.00722e-05	0.000401743
ENSMUSG00000025978	Rftn2	0.269053	4.46853	0.00282974	0.0178376
ENSMUSG00000026509	Capn2	0.268643	6.09526	1.72932e-05	0.000248082
ENSMUSG00000039697	Ncoa7	0.268197	6.28471	4.96691e-05	0.000622249
ENSMUSG00000015087	Rabl6	0.268101	7.01689	5.64576e-06	9.2067e-05
ENSMUSG00000002733	Plekha3	0.268059	4.55732	0.0040177	0.0234842
ENSMUSG00000032598	Nckipsd	0.267588	5.31709	0.00312538	0.0192333
ENSMUSG00000003746	Man1a	0.267479	5.54035	0.000117905	0.00130448
ENSMUSG00000021549	Rasa1	0.267194	5.36681	0.000367177	0.00332861
ENSMUSG00000023805	Synj2	0.26712	5.66564	0.000317408	0.00296326
ENSMUSG00000047747	Rnf150	0.266999	5.89678	0.000335937	0.00310316
ENSMUSG00000021224	Numb	0.266635	5.06777	0.0010451	0.00797552
ENSMUSG00000029467	Atp2a2	0.266607	9.4337	0.000219167	0.00219342
ENSMUSG00000027742	Cog6	0.266375	5.25715	0.00065988	0.00540053
ENSMUSG00000051177	Plcb1	0.266247	7.7225	3.7278e-05	0.000485779
ENSMUSG00000028274	Rngtt	0.266154	4.32026	0.00870377	0.0431469
ENSMUSG00000048720	Tbc1d12	0.26611	4.13394	0.00570191	0.0309194
ENSMUSG00000025892	Gria4	0.265186	6.57902	5.19786e-06	8.54792e-05
ENSMUSG00000045598	Zfp553	0.264892	4.41879	0.00955857	0.0463223
ENSMUSG00000021392	Nol8	0.264471	4.59863	0.0038357	0.0226419
ENSMUSG00000032531	Amotl2	0.264234	4.0061	0.00920918	0.0450655
ENSMUSG00000035770	Dync1li2	0.26423	7.86429	1.72921e-05	0.000248082
ENSMUSG00000021983	Atp8a2	0.263868	6.31438	0.000310076	0.00290418
ENSMUSG00000028820	Sfpq	0.263826	7.35214	2.5827e-05	0.000351738
ENSMUSG00000026663	Atf6	0.263724	5.84101	0.00428199	0.0246207
ENSMUSG00000053702	Nebl	0.263673	5.83841	0.000159185	0.00168254
ENSMUSG00000025656	Arhgef9	0.263455	8.58508	0.00014205	0.00153666
ENSMUSG00000025245	Lztfl1	0.263371	5.11534	0.000647456	0.00532123
ENSMUSG00000015575	Atp6v0e	0.262803	4.50841	0.00505362	0.0281071
ENSMUSG00000028149	Rap1gds1	0.261749	8.25304	7.13257e-06	0.000113152
ENSMUSG00000025475	Adgra1	0.261304	5.99501	0.000122543	0.00135067
ENSMUSG00000064105	Cnnm2	0.26111	4.70193	0.00170193	0.011822
ENSMUSG00000043252	Tmem64	0.261048	5.49939	0.000736671	0.00594565
ENSMUSG00000029253	Cenpc1	0.261019	4.27071	0.0063174	0.0334775
ENSMUSG00000048007	Timm8a1	0.260879	4.25545	0.00353525	0.0211825
ENSMUSG00000021711	Trappc13	0.260791	5.35227	0.000125222	0.00137501
ENSMUSG00000024642	Tle4	0.260785	5.7567	0.00508489	0.0282541
ENSMUSG00000031333	Abcb7	0.260784	5.05415	0.00216791	0.0143985
ENSMUSG00000003814	Calr	0.26074	8.7166	4.01837e-05	0.00051769
ENSMUSG00000026667	Uhmk1	0.260613	8.21589	1.28444e-05	0.000192107
ENSMUSG00000029189	Sel1l3	0.260507	6.22396	2.53278e-05	0.000346015
ENSMUSG00000044067	Gpr22	0.260437	5.86675	0.00183018	0.0125037
ENSMUSG00000021245	Mlh3	0.260435	4.49321	0.00199391	0.0134416
ENSMUSG00000041268	Dmxl2	0.260025	7.57241	2.1361e-05	0.000299533
ENSMUSG00000059173	Pde1a	0.259574	7.38174	8.87851e-06	0.000138098
ENSMUSG00000028710	Atpaf1	0.259566	4.71247	0.00104952	0.00799885
ENSMUSG00000014164	Klhl3	0.259509	5.80875	0.000494064	0.00429218
ENSMUSG00000039809	Gabbr2	0.259442	8.38025	2.58239e-06	4.5364e-05
ENSMUSG00000049606	Zfp644	0.259436	5.96147	7.46954e-05	0.000887463
ENSMUSG00000018395	Kif3a	0.25914	6.96655	5.28412e-05	0.000655425
ENSMUSG00000020627	Klhl29	0.259022	5.88213	8.42729e-05	0.000980516
ENSMUSG00000028698	Pik3r3	0.25861	6.24326	1.71574e-05	0.000246712
ENSMUSG00000031555	Adam9	0.258554	5.91944	0.000166535	0.00175072
ENSMUSG00000024039	Cbs	0.258034	4.96812	0.00127283	0.00936258
ENSMUSG00000090223	Pcp4	0.257795	8.33524	1.32381e-05	0.000196485
ENSMUSG00000019978	Epb41l2	0.25777	7.13272	5.15321e-06	8.49043e-05
ENSMUSG00000040022	Rab11fip2	0.257752	5.99211	0.0010323	0.00788819
ENSMUSG00000071456	1110002L01Rik	0.257749	4.16869	0.00412104	0.0238914
ENSMUSG00000035173	Ccdc186	0.257607	5.44446	0.000220785	0.00220458
ENSMUSG00000025813	Homer2	0.257566	6.23849	0.000197973	0.00201822
ENSMUSG00000050668	Gpatch11	0.257356	4.62637	0.0103605	0.0493215
ENSMUSG00000042724	Map3k9	0.257174	4.51895	0.00912533	0.0447803
ENSMUSG00000031647	Mfap3l	0.257119	5.51868	0.000191752	0.00197085
ENSMUSG00000037234	Hook3	0.256995	6.38212	0.000872583	0.00685926
ENSMUSG00000048578	Mlec	0.256947	6.97562	0.00236952	0.0155023
ENSMUSG00000020435	Osbp2	0.256876	6.59547	4.05342e-05	0.000520849
ENSMUSG00000043241	Upf2	0.256833	5.16743	0.000603916	0.00502947
ENSMUSG00000058589	Anks1b	0.256757	8.3968	0.000387703	0.00348932
ENSMUSG00000052572	Dlg2	0.256557	9.20791	1.11279e-05	0.000168594
ENSMUSG00000037720	Tmem33	0.256394	6.67761	1.62877e-05	0.000235437
ENSMUSG00000028619	Tceanc2	0.256329	4.50433	0.00373333	0.0222022
ENSMUSG00000055567	Unc80	0.256259	7.41084	0.00035563	0.00324571
ENSMUSG00000020580	Rock2	0.255928	7.2921	0.000707378	0.00573722
ENSMUSG00000038784	Cnot4	0.255878	4.94418	0.00117556	0.0087773
ENSMUSG00000058258	Idi1	0.255664	6.28519	0.00178038	0.0122521
ENSMUSG00000028082	Sh3d19	0.255625	4.94297	0.00989169	0.0475943
ENSMUSG00000029684	Wasl	0.255378	6.62691	0.000551339	0.0046783
ENSMUSG00000078908	Mon1b	0.255323	4.93944	0.00173529	0.0120078
ENSMUSG00000042742	Bmt2	0.255173	5.10803	0.00158863	0.0111785
ENSMUSG00000004267	Eno2	0.254984	9.26176	0.000271836	0.00259169
ENSMUSG00000024044	Epb41l3	0.254836	7.24134	4.27584e-06	7.20761e-05
ENSMUSG00000027710	Acad9	0.254782	5.03613	0.000488443	0.00425178
ENSMUSG00000035885	Cox8a	0.25473	8.24214	0.000339612	0.00313215
ENSMUSG00000034656	Cacna1a	0.254517	7.50413	4.94445e-05	0.000620621
ENSMUSG00000028804	Csmd2	0.253989	5.68204	0.00864103	0.0429195
ENSMUSG00000073514	Dok6	0.253975	6.50708	6.53104e-05	0.000790216
ENSMUSG00000039523	Cep104	0.253972	5.19288	0.000579927	0.00486905
ENSMUSG00000047786	Lix1	0.253892	5.94804	0.000574146	0.00483629
ENSMUSG00000017390	Aldoc	0.2538	9.07448	2.55737e-05	0.0003489
ENSMUSG00000026904	Slc4a10	0.253624	7.78864	0.00123382	0.00914475
ENSMUSG00000061603	Akap6	0.253611	8.04327	4.62715e-06	7.72545e-05
ENSMUSG00000024544	Ldlrad4	0.253568	4.35461	0.00453145	0.0256758
ENSMUSG00000026925	Inpp5e	0.253355	4.53647	0.00540492	0.0296096
ENSMUSG00000022037	Clu	0.25331	8.98177	3.03558e-06	5.24311e-05
ENSMUSG00000029701	Rbm28	0.253072	5.31928	0.00837881	0.04182
ENSMUSG00000040855	Reps2	0.253049	7.34504	5.84595e-05	0.000716487
ENSMUSG00000034310	Tmem132d	0.253013	5.42433	0.00314802	0.019333
ENSMUSG00000043467	Zbtb37	0.252962	4.38138	0.0049889	0.0277912
ENSMUSG00000026109	Tmeff2	0.25294	5.90396	0.000176384	0.0018358
ENSMUSG00000027087	Itgav	0.252878	5.93942	0.000245809	0.00239182
ENSMUSG00000032349	Elovl5	0.252853	6.40676	0.000156842	0.00166582
ENSMUSG00000023055	Calcoco1	0.252377	5.87215	0.000988541	0.0076371
ENSMUSG00000101111	Gm28437	0.251843	12.8846	1.44949e-05	0.000213052
ENSMUSG00000055538	Zcchc24	0.251771	6.17224	0.000187756	0.00193661
ENSMUSG00000041303	Gtf3c3	0.251392	4.97115	0.000567576	0.00479987
ENSMUSG00000040433	Zbtb38	0.251357	5.30545	0.00153317	0.0108741
ENSMUSG00000029661	Col1a2	0.251186	5.75758	0.00553539	0.0302203
ENSMUSG00000040724	Kcna2	0.251184	7.56538	0.000145539	0.00156571
ENSMUSG00000020917	Acly	0.250914	7.29173	3.48403e-05	0.000458447
ENSMUSG00000023011	Faim2	0.250559	8.13942	2.48555e-05	0.000340697
ENSMUSG00000021340	Gpld1	0.250266	4.49306	0.00604334	0.0324075
ENSMUSG00000108348	Pnma8c	0.25022	6.66188	5.63447e-05	0.000692021
ENSMUSG00000058230	Arhgap35	0.250153	7.84057	2.05838e-05	0.000290262
ENSMUSG00000021238	Aldh6a1	0.249892	5.33532	0.00161022	0.0112986
ENSMUSG00000034825	Nrip3	0.24983	7.02348	3.45521e-05	0.000454996
ENSMUSG00000032328	Tmem30a	0.249696	8.55646	2.90752e-05	0.00038991
ENSMUSG00000035620	Ric8b	0.249577	5.16968	0.000516182	0.0044283
ENSMUSG00000064289	Tank	0.24955	4.57301	0.00377556	0.0223698
ENSMUSG00000042359	Osbpl6	0.249491	5.8421	0.000648144	0.00532439
ENSMUSG00000050505	Pcdh20	0.249273	4.73593	0.00947295	0.0460155
ENSMUSG00000041889	Shisa4	0.249231	6.47255	0.000105529	0.00118325
ENSMUSG00000028550	Atg4c	0.248987	5.22285	0.000538523	0.00458206
ENSMUSG00000034981	Parm1	0.248982	6.14996	0.000388581	0.00349543
ENSMUSG00000102697	Pcdhac2	0.248904	6.46505	0.000131308	0.00143285
ENSMUSG00000037386	Rims2	0.248865	6.61026	1.49675e-05	0.000219364
ENSMUSG00000025964	Adam23	0.248728	7.11448	2.45566e-05	0.000337851
ENSMUSG00000021171	Esyt2	0.248696	5.3707	0.000678387	0.00553647
ENSMUSG00000021256	Vash1	0.248652	4.38874	0.00819842	0.0410836
ENSMUSG00000023913	Pla2g7	0.248459	6.14557	0.000147534	0.00158522
ENSMUSG00000030235	Slco1c1	0.248396	5.8507	0.00102734	0.00786397
ENSMUSG00000033615	Cplx1	0.248384	8.98801	1.2176e-05	0.000183204
ENSMUSG00000023800	Tiam2	0.248304	6.0495	3.9434e-05	0.000509703
ENSMUSG00000030657	Xylt1	0.247714	6.05839	0.00729937	0.0374571
ENSMUSG00000046138	9930021J03Rik	0.247389	5.03202	0.00629923	0.0334115
ENSMUSG00000025531	Chm	0.247382	5.70971	0.000814903	0.00646972
ENSMUSG00000040265	Dnm3	0.247353	6.73998	0.000106991	0.00119658
ENSMUSG00000052539	Magi3	0.24722	5.89023	0.000726268	0.00586439
ENSMUSG00000000340	Dbt	0.247185	4.85168	0.00345596	0.020807
ENSMUSG00000026944	Abca2	0.246861	7.50213	0.000151127	0.00161689
ENSMUSG00000028780	Sema3c	0.246798	5.15776	0.0029859	0.0186037
ENSMUSG00000003226	Ranbp2	0.246138	6.91218	0.00303321	0.0187982
ENSMUSG00000039253	Fn3krp	0.245895	4.6054	0.0043783	0.0249777
ENSMUSG00000045034	Ankrd34b	0.245847	4.536	0.0102195	0.0488012
ENSMUSG00000026202	Tuba4a	0.245152	9.14134	1.78859e-05	0.000255926
ENSMUSG00000034928	Rnf44	0.245077	6.78419	0.000603546	0.00502878
ENSMUSG00000045349	Sh2d5	0.245063	5.85627	0.00128408	0.00942952
ENSMUSG00000038143	Stox2	0.245006	6.80832	0.00133117	0.00969402
ENSMUSG00000036054	Sugp2	0.244825	6.35572	0.000375599	0.00339961
ENSMUSG00000050321	Neto1	0.244669	7.27903	0.000219569	0.00219494
ENSMUSG00000046699	Slitrk4	0.244414	5.41783	0.00386916	0.0227933
ENSMUSG00000041794	Myrip	0.244256	6.17781	0.00010318	0.00116063
ENSMUSG00000064363	mt-Nd4	0.243965	12.6801	0.00813098	0.0408234
ENSMUSG00000030759	Far1	0.24394	6.86071	9.46286e-05	0.0010818
ENSMUSG00000033382	Trappc8	0.243727	5.34569	0.00171437	0.0118949
ENSMUSG00000031778	Cx3cl1	0.243581	9.70719	1.61034e-05	0.000233473
ENSMUSG00000020205	Phlda1	0.243532	4.79545	0.00505948	0.0281307
ENSMUSG00000047141	Zfp654	0.243519	4.45136	0.00706345	0.0365114
ENSMUSG00000028518	Prkaa2	0.243468	5.48825	0.000900298	0.0070518
ENSMUSG00000039270	Megf9	0.243422	6.95898	0.000261817	0.00252087
ENSMUSG00000032537	Ephb1	0.243348	5.77734	0.000156706	0.00166582
ENSMUSG00000046321	Hs3st2	0.243186	5.46809	0.00488457	0.0273056
ENSMUSG00000060371	Caln1	0.243163	8.01329	0.00124202	0.00919002
ENSMUSG00000037989	Wnk2	0.243147	6.83421	5.01868e-05	0.000626941
ENSMUSG00000027253	Lrp4	0.243136	4.95964	0.00590262	0.031799
ENSMUSG00000041216	Clvs1	0.242926	5.64438	0.000852039	0.00672492
ENSMUSG00000038506	Dcun1d2	0.242897	5.1531	0.00211106	0.0140743
ENSMUSG00000024413	Npc1	0.242763	5.29388	0.00144071	0.010337
ENSMUSG00000038530	Rgs4	0.242699	8.9059	9.3885e-05	0.00107471
ENSMUSG00000035314	Gdpd5	0.242612	5.16769	0.00258878	0.0165837
ENSMUSG00000025742	Prps2	0.242429	4.4531	0.00443499	0.0252436
ENSMUSG00000024491	Rbm27	0.242421	5.26409	0.000585832	0.00490687
ENSMUSG00000050711	Scg2	0.242294	7.66571	0.000708366	0.00573831
ENSMUSG00000027893	Ahcyl1	0.242232	8.54627	6.24281e-05	0.000758754
ENSMUSG00000035376	Hacd2	0.242148	5.22221	0.000821965	0.00651692
ENSMUSG00000033526	Ppip5k1	0.242091	6.24083	0.000320295	0.00298385
ENSMUSG00000044149	Nkrf	0.241949	4.95577	0.00165508	0.0115532
ENSMUSG00000029571	Tmem106b	0.24177	7.41968	0.000181824	0.00188096
ENSMUSG00000055296	Tmem245	0.241479	6.30417	0.000156816	0.00166582
ENSMUSG00000018474	Chd3	0.241234	9.56363	4.33146e-05	0.000552725
ENSMUSG00000041037	Irgq	0.241117	7.26421	0.000202435	0.00205176
ENSMUSG00000054477	Kcnn2	0.240931	4.90063	0.00805751	0.040545
ENSMUSG00000021895	Arhgef3	0.240875	6.04448	0.000922108	0.00720009
ENSMUSG00000020721	Helz	0.240857	5.54781	0.00920018	0.0450467
ENSMUSG00000025868	Higd2a	0.24069	5.97406	0.00145899	0.0104468
ENSMUSG00000037933	Bicd2	0.24067	6.24419	0.000480091	0.00419158
ENSMUSG00000020523	Fam114a2	0.240555	4.82282	0.00344764	0.0207712
ENSMUSG00000036257	Pnpla8	0.240453	6.8951	4.63018e-05	0.000585932
ENSMUSG00000036298	Slc2a13	0.240413	6.86839	0.000204444	0.00206734
ENSMUSG00000027030	Stk39	0.240325	5.99692	0.000226947	0.00225749
ENSMUSG00000070695	Cntnap5a	0.24032	5.55934	0.000351728	0.00321511
ENSMUSG00000038976	Ppp1r9b	0.240244	9.56371	1.63484e-05	0.000235853
ENSMUSG00000024063	Lbh	0.24	5.80614	0.000985354	0.00761584
ENSMUSG00000022494	Shisa9	0.239933	6.17056	0.00027754	0.00264032
ENSMUSG00000018750	Zbtb4	0.239927	6.73612	0.000129849	0.00142225
ENSMUSG00000049313	Sorl1	0.23973	7.73086	0.00107313	0.00812926
ENSMUSG00000052632	Asap2	0.239651	5.45908	0.00153346	0.0108741
ENSMUSG00000036503	Rnf13	0.239399	6.3108	0.000124605	0.00136995
ENSMUSG00000043542	Zc2hc1a	0.239311	6.16091	0.000226987	0.00225749
ENSMUSG00000032846	Zswim6	0.239101	4.97562	0.0105497	0.0499911
ENSMUSG00000021373	Cap2	0.239007	7.53287	0.000144508	0.00155844
ENSMUSG00000021870	Slmap	0.238491	6.57155	0.000264454	0.00253511
ENSMUSG00000056234	Ncoa4	0.238323	6.78558	5.99025e-05	0.000732634
ENSMUSG00000006476	Nsmf	0.238145	9.15572	0.000123827	0.00136225
ENSMUSG00000025372	Baiap2	0.238103	7.99832	0.00117886	0.00878948
ENSMUSG00000058070	Eml1	0.237934	5.97234	0.000602189	0.00501986
ENSMUSG00000005362	Crbn	0.237906	5.45856	0.000356526	0.00325219
ENSMUSG00000027428	Rbbp9	0.237899	4.90868	0.00382052	0.0225827
ENSMUSG00000026361	Cdc73	0.237771	5.36333	0.00353162	0.0211763
ENSMUSG00000027797	Dclk1	0.237682	10.1604	4.5673e-05	0.000578393
ENSMUSG00000026347	Tmem163	0.23763	4.91814	0.00334895	0.0202883
ENSMUSG00000030869	Ndufab1	0.237569	5.96378	0.00120974	0.00898916
ENSMUSG00000025427	Ark2c	0.237461	6.63981	0.00145843	0.0104468
ENSMUSG00000032375	Aph1b	0.237279	4.81261	0.00546132	0.0298532
ENSMUSG00000027993	Trim2	0.236938	7.70306	0.00061223	0.00507939
ENSMUSG00000022012	Enox1	0.236907	4.9743	0.00431968	0.0247531
ENSMUSG00000038244	Mical2	0.236809	8.01898	0.000183409	0.00189512
ENSMUSG00000037287	Tbcel	0.236802	5.99705	0.002386	0.0155695
ENSMUSG00000069539	Scyl2	0.236706	5.16823	0.00127812	0.00938967
ENSMUSG00000029090	Adgra3	0.236525	4.69778	0.00409201	0.0237624
ENSMUSG00000043067	Dpy19l1	0.236488	6.22708	0.000104108	0.00116881
ENSMUSG00000037013	Ss18	0.236412	4.89947	0.00300542	0.0186868
ENSMUSG00000032018	Sc5d	0.236334	6.19202	0.0013399	0.00973331
ENSMUSG00000075054	Yae1d1	0.236273	5.38044	0.000647128	0.00532103
ENSMUSG00000020817	Rabep1	0.236257	7.10925	5.3695e-05	0.000663197
ENSMUSG00000070730	Rmdn3	0.236097	5.48859	0.00057591	0.00484229
ENSMUSG00000024330	Col11a2	0.236027	4.77304	0.00900654	0.0443216
ENSMUSG00000078878	Gm14305	0.235969	4.65474	0.00458024	0.0258936
ENSMUSG00000078584	AU022252	0.23583	5.26235	0.00165657	0.011559
ENSMUSG00000047888	Tnrc6b	0.235665	6.44798	0.000556145	0.00471002
ENSMUSG00000056608	Chd9	0.235593	5.67896	0.00189713	0.0128694
ENSMUSG00000031284	Pak3	0.235509	7.05203	3.26279e-05	0.000431203
ENSMUSG00000030465	Psd3	0.235224	9.02935	0.000175702	0.0018317
ENSMUSG00000036104	Rab3gap1	0.235197	6.32673	0.00017307	0.00180864
ENSMUSG00000030515	Tars3	0.23516	5.46619	0.00153357	0.0108741
ENSMUSG00000046159	Chrm3	0.234943	5.37757	0.00154304	0.0109323
ENSMUSG00000059742	Kcnh7	0.234879	6.5553	0.000101763	0.00114615
ENSMUSG00000040383	Aqr	0.234672	5.0945	0.00455767	0.0257844
ENSMUSG00000016427	Ndufa1	0.234547	5.14222	0.00263422	0.0168405
ENSMUSG00000028785	Hpca	0.234426	8.75219	0.00119437	0.00889004
ENSMUSG00000042363	Lgalsl	0.23418	6.6853	0.000153084	0.00163482
ENSMUSG00000014763	Fam120b	0.234049	5.59007	0.000456905	0.00402123
ENSMUSG00000035151	Elmod2	0.233998	4.33603	0.0099714	0.0478595
ENSMUSG00000052512	Nav2	0.233656	6.02592	0.00102929	0.00787206
ENSMUSG00000022253	Nadk2	0.233575	4.8577	0.00188896	0.0128279
ENSMUSG00000027782	Kpna4	0.233439	6.36866	0.000241236	0.0023577
ENSMUSG00000026764	Kif5c	0.233418	9.71439	7.29513e-05	0.000868572
ENSMUSG00000013646	Sh3bp5l	0.233239	5.69047	0.00134367	0.00975662
ENSMUSG00000039960	Rhou	0.232902	5.59176	0.00249385	0.0161231
ENSMUSG00000037624	Kcnk2	0.232792	6.21818	0.000431184	0.00382755
ENSMUSG00000012076	Brms1l	0.232596	5.77074	0.000509832	0.00438415
ENSMUSG00000045210	Vcpip1	0.232507	6.12405	0.000478895	0.00418531
ENSMUSG00000025059	Gk	0.232358	4.77067	0.00518145	0.0286713
ENSMUSG00000044288	Cnr1	0.232317	7.3595	0.000812371	0.00645255
ENSMUSG00000042508	Dmtf1	0.232108	5.83094	0.000810787	0.00644581
ENSMUSG00000056486	Chn1	0.231837	9.60776	0.000167686	0.00176176
ENSMUSG00000078137	Ankrd63	0.231669	5.12597	0.00398554	0.0233298
ENSMUSG00000034295	Fhod3	0.231529	6.11386	0.000174366	0.00181994
ENSMUSG00000021339	Mrs2	0.231448	6.27093	0.000973447	0.00753378
ENSMUSG00000058594	Fbh1	0.231369	6.08283	0.000203978	0.00206502
ENSMUSG00000040407	Akap9	0.231344	6.4516	0.00617082	0.0328697
ENSMUSG00000025894	Aasdhppt	0.231337	4.48922	0.00978568	0.0471749
ENSMUSG00000025321	Itgb8	0.231303	5.76212	0.000801701	0.00638517
ENSMUSG00000027130	Slc12a6	0.230907	6.8067	0.000132376	0.00144361
ENSMUSG00000027652	Ralgapb	0.230825	6.97887	0.000115688	0.00128563
ENSMUSG00000031750	Il34	0.230704	5.6299	0.000432298	0.0038355
ENSMUSG00000041528	Rnf123	0.23061	5.5855	0.000586341	0.00490878
ENSMUSG00000057637	Prdm2	0.230598	6.09465	0.00600374	0.0322544
ENSMUSG00000063694	Cycs	0.230532	7.92531	0.000245401	0.00239041
ENSMUSG00000001323	Srr	0.230322	6.56249	0.000164214	0.00172735
ENSMUSG00000040209	Zfp704	0.230209	6.29258	0.000200346	0.00203885
ENSMUSG00000021236	Entpd5	0.230104	4.99445	0.00313584	0.0192773
ENSMUSG00000029407	Uso1	0.229851	6.19645	0.000224399	0.00223557
ENSMUSG00000022664	Slc35a5	0.229824	5.44993	0.000975642	0.00754744
ENSMUSG00000007097	Atp1a2	0.229814	10.0044	0.000348377	0.00319123
ENSMUSG00000032253	Phip	0.22962	5.88421	0.000430105	0.0038199
ENSMUSG00000022141	Nipbl	0.229599	5.33546	0.00936916	0.0456825
ENSMUSG00000026502	Desi2	0.229553	4.86427	0.00696195	0.0361124
ENSMUSG00000028132	Tlcd4	0.228846	5.56827	0.00626221	0.0332928
ENSMUSG00000034158	Lrrc58	0.228554	6.73023	0.000690534	0.00562363
ENSMUSG00000019996	Map7	0.228519	5.94803	0.000499452	0.00431757
ENSMUSG00000098912	1500004A13Rik	0.228501	6.32884	0.000571771	0.0048237
ENSMUSG00000040321	Zfp770	0.228306	5.03786	0.00607125	0.0325373
ENSMUSG00000051379	Flrt3	0.228053	5.00001	0.00239769	0.0156399
ENSMUSG00000020170	Frs2	0.228016	5.26315	0.0030552	0.0188877
ENSMUSG00000027680	Fxr1	0.227957	5.72311	0.000947635	0.00736004
ENSMUSG00000043531	Sorcs1	0.227952	5.58506	0.00175127	0.0120993
ENSMUSG00000121513	Ptprg	0.227565	6.57725	0.00143789	0.0103252
ENSMUSG00000006740	Kif5b	0.227365	7.23567	0.00163012	0.0114198
ENSMUSG00000031314	Taf1	0.227359	6.0041	0.00154617	0.0109457
ENSMUSG00000062591	Tubb4a	0.227262	9.55277	6.21559e-05	0.000756496
ENSMUSG00000020607	Lratd1	0.227231	5.9326	0.00114252	0.00856966
ENSMUSG00000056427	Slit3	0.227231	4.95813	0.0104064	0.0495131
ENSMUSG00000036980	Taf6	0.227228	4.63576	0.00608742	0.0325841
ENSMUSG00000024966	Stip1	0.227079	7.18529	0.00179821	0.0123391
ENSMUSG00000066607	Insyn1	0.227037	6.79666	0.000227889	0.00226133
ENSMUSG00000026792	Lrsam1	0.227013	4.73782	0.00544981	0.0298089
ENSMUSG00000035566	Pcdh17	0.226999	6.60964	0.0077299	0.0391502
ENSMUSG00000026311	Asb1	0.22695	5.68637	0.00182149	0.0124616
ENSMUSG00000030061	Uba3	0.226943	5.85625	0.000421245	0.00375837
ENSMUSG00000021066	Atl1	0.226895	7.03705	9.48612e-05	0.00108234
ENSMUSG00000025899	Alkbh8	0.226823	5.35391	0.00102026	0.00782007
ENSMUSG00000041720	Pi4ka	0.226186	7.67889	3.38237e-05	0.00044574
ENSMUSG00000034563	Ccpg1	0.22591	6.49498	0.000292318	0.00276561
ENSMUSG00000054162	Spock3	0.225643	6.7297	0.00220134	0.0145984
ENSMUSG00000037259	Dzank1	0.22554	7.59498	0.000157889	0.00167389
ENSMUSG00000064337	mt-Rnr1	0.22552	11.9569	0.000144908	0.00156084
ENSMUSG00000020458	Rtn4	0.225408	9.26741	8.52517e-05	0.000988807
ENSMUSG00000044308	Ubr3	0.225311	7.76868	0.000494886	0.00429486
ENSMUSG00000020315	Sptbn1	0.225307	9.93311	9.74426e-05	0.00110603
ENSMUSG00000037098	Rab11fip3	0.225298	6.63219	0.000295387	0.0027874
ENSMUSG00000041483	Zfp281	0.225279	5.58763	0.00177622	0.0122283
ENSMUSG00000030638	Sh3gl3	0.225266	5.48142	0.00131282	0.00959231
ENSMUSG00000029175	Slc35f6	0.225112	5.03497	0.00203956	0.0136914
ENSMUSG00000031600	Vps37a	0.224983	5.7013	0.0011172	0.00840765
ENSMUSG00000042978	Sbk1	0.224856	7.09394	0.0007809	0.00624506
ENSMUSG00000062203	Gspt1	0.224837	6.07665	0.000270122	0.00257956
ENSMUSG00000059003	Grin2a	0.224797	7.3704	0.000456462	0.00401934
ENSMUSG00000027519	Rab22a	0.224734	5.7701	0.000835901	0.00660648
ENSMUSG00000030614	Tmem126b	0.224733	4.89527	0.00400413	0.0234308
ENSMUSG00000026077	Npas2	0.224668	5.17332	0.00365663	0.0218276
ENSMUSG00000036046	5031439G07Rik	0.22466	7.40714	0.000169179	0.00177531
ENSMUSG00000060240	Cend1	0.224429	8.17994	0.000236964	0.00233026
ENSMUSG00000030774	Pak1	0.224426	8.31839	4.31088e-05	0.000550699
ENSMUSG00000075232	Amd1	0.224331	6.62899	0.000263271	0.00252792
ENSMUSG00000027834	Serpini1	0.224164	7.73944	0.00243455	0.0158097
ENSMUSG00000066441	Rdh11	0.224086	4.75787	0.00686949	0.0356904
ENSMUSG00000033610	Pank1	0.223758	4.64656	0.00841264	0.0419564
ENSMUSG00000038690	Atp5mf	0.223503	7.47921	0.00419981	0.0242517
ENSMUSG00000020859	Spag9	0.223353	8.47131	0.000378284	0.00341685
ENSMUSG00000016664	Pacsin2	0.223337	5.19998	0.00676579	0.0353163
ENSMUSG00000038564	Ift172	0.223263	5.41536	0.00176147	0.0121602
ENSMUSG00000053025	Sv2b	0.222881	8.91369	0.000439901	0.00388916
ENSMUSG00000048304	Slitrk3	0.222761	5.74852	0.00185627	0.0126599
ENSMUSG00000041729	Coro2b	0.222417	7.52992	0.000206421	0.00208253
ENSMUSG00000041141	Pnma8a	0.222361	7.14393	8.58806e-05	0.00099347
ENSMUSG00000045576	St7l	0.222305	4.33272	0.00873866	0.043266
ENSMUSG00000031592	Pcm1	0.222196	6.05146	0.00536822	0.0294546
ENSMUSG00000025326	Ube3a	0.221958	6.89236	0.00142622	0.0102667
ENSMUSG00000024533	Spire1	0.221827	7.237	0.000307755	0.00288872
ENSMUSG00000003721	Insig2	0.221531	4.96507	0.00479074	0.0268582
ENSMUSG00000019966	Kitl	0.221526	5.8738	0.00140442	0.0101306
ENSMUSG00000046324	Ermp1	0.221523	5.97891	0.000794628	0.0063346
ENSMUSG00000031010	Usp9x	0.221267	7.98249	0.000160055	0.0016897
ENSMUSG00000052949	Rnf157	0.221242	8.10586	9.96601e-05	0.00112828
ENSMUSG00000019818	Cd164	0.221141	5.91886	0.000909501	0.00711434
ENSMUSG00000035798	Zdhhc17	0.220823	6.48638	0.00167824	0.0116823
ENSMUSG00000029636	Wasf3	0.220469	7.00194	0.00509557	0.0282775
ENSMUSG00000026721	Rabgap1l	0.220409	7.02333	0.000205164	0.00207342
ENSMUSG00000064293	Cntn4	0.219997	5.09704	0.00390295	0.0229153
ENSMUSG00000062098	Btbd3	0.219912	7.07714	0.0003866	0.00348298
ENSMUSG00000063410	Stk24	0.219899	4.91603	0.00494424	0.0275891
ENSMUSG00000032293	Ireb2	0.219832	6.44219	0.000548358	0.00465985
ENSMUSG00000041058	Wwp1	0.219356	5.27039	0.00258802	0.0165837
ENSMUSG00000021270	Hsp90aa1	0.219337	10.1934	0.000180809	0.00187157
ENSMUSG00000073557	Ppp1r12b	0.218971	7.18181	0.000135615	0.00147342
ENSMUSG00000028373	Astn2	0.218594	5.30457	0.00464202	0.0261921
ENSMUSG00000020848	Doc2b	0.218392	5.84415	0.00725985	0.037298
ENSMUSG00000027210	Meis2	0.218374	6.57288	0.00670785	0.0351005
ENSMUSG00000021112	Pals1	0.218283	4.68465	0.00962391	0.0465745
ENSMUSG00000038967	Pdk2	0.218282	6.13114	0.000261432	0.00251855
ENSMUSG00000029108	Pcdh7	0.218178	7.18005	0.000531361	0.00452859
ENSMUSG00000040560	Wdr7	0.218025	7.49575	0.000129717	0.00142169
ENSMUSG00000026701	Prdx6	0.217878	7.0985	0.000267004	0.00255536
ENSMUSG00000035569	Ankrd11	0.21772	7.21423	0.00218982	0.014533
ENSMUSG00000026179	Pnkd	0.217621	7.06209	0.000287755	0.00272713
ENSMUSG00000028931	Kcnab2	0.217547	8.08647	0.000638776	0.00525976
ENSMUSG00000045092	S1pr1	0.217414	6.59023	0.000453461	0.00399493
ENSMUSG00000002221	Paxip1	0.217251	5.29391	0.0041555	0.024034
ENSMUSG00000025920	Stau2	0.217148	6.97383	0.000328807	0.00305179
ENSMUSG00000026657	Frmd4a	0.217101	6.45745	0.00325355	0.0198615
ENSMUSG00000052302	Tbc1d30	0.216848	6.4482	0.000405084	0.00363455
ENSMUSG00000003949	Hlf	0.216807	7.03394	0.00242064	0.0157369
ENSMUSG00000024862	Klc2	0.21648	7.52851	0.000202705	0.00205331
ENSMUSG00000069806	Cacng7	0.21632	7.3502	0.000764973	0.00614012
ENSMUSG00000019558	Slc6a8	0.215945	6.33528	0.000600895	0.00501146
ENSMUSG00000032878	Ccdc85a	0.215654	6.1481	0.000752767	0.00605602
ENSMUSG00000030347	D6Wsu163e	0.215541	4.70464	0.00897054	0.0441692
ENSMUSG00000044340	Phlpp1	0.215303	6.00436	0.00120196	0.00893893
ENSMUSG00000015222	Map2	0.2153	10.0467	0.00019331	0.0019799
ENSMUSG00000049907	Rasl11b	0.215176	5.73384	0.0006763	0.00552201
ENSMUSG00000037152	Ndufc1	0.214948	5.17179	0.00615112	0.0328047
ENSMUSG00000028354	Fmn2	0.214847	6.02031	0.00186662	0.0127058
ENSMUSG00000025092	Hspa12a	0.214618	8.12376	0.000212698	0.00213845
ENSMUSG00000024462	Gabbr1	0.214197	9.25259	0.0001209	0.00133424
ENSMUSG00000023150	Ivns1abp	0.214182	7.39888	0.000594781	0.00496994
ENSMUSG00000028399	Ptprd	0.21412	8.03396	0.000395935	0.00355793
ENSMUSG00000048385	Scrt1	0.214112	6.57636	0.000830245	0.00656827
ENSMUSG00000038264	Sema7a	0.214094	6.83835	0.000239171	0.00234406
ENSMUSG00000041020	Map7d2	0.214088	6.93485	0.000996026	0.00768476
ENSMUSG00000052917	Senp7	0.214048	5.02886	0.00376599	0.0223207
ENSMUSG00000021111	Papola	0.214007	6.63419	0.000657224	0.00538886
ENSMUSG00000038014	Fam120a	0.214002	7.32632	0.000894839	0.00701532
ENSMUSG00000020231	Dip2a	0.213962	6.10187	0.000636201	0.00524888
ENSMUSG00000029238	Clock	0.213868	6.41602	0.000751144	0.00604575
ENSMUSG00000039016	Timm8b	0.213798	6.44732	0.000929396	0.00725053
ENSMUSG00000032086	Bace1	0.21375	7.12447	0.000204327	0.00206734
ENSMUSG00000038949	Cnst	0.213707	5.38602	0.00334815	0.0202883
ENSMUSG00000034312	Iqsec1	0.213707	7.51751	0.000244995	0.00238778
ENSMUSG00000020532	Acaca	0.213687	6.52186	0.00258812	0.0165837
ENSMUSG00000064127	Med14	0.213439	6.0616	0.00205574	0.0137789
ENSMUSG00000041556	Fbxo2	0.213249	5.30371	0.00539526	0.0295844
ENSMUSG00000006464	Bbs1	0.21321	5.69162	0.00127085	0.00935378
ENSMUSG00000048874	Phf3	0.213162	6.35281	0.00211107	0.0140743
ENSMUSG00000021290	Atp5mj	0.213067	6.63919	0.000862923	0.0067973
ENSMUSG00000024242	Map4k3	0.212998	6.12603	0.00110352	0.00833059
ENSMUSG00000032281	Acsbg1	0.212913	6.92526	0.000201591	0.00204795
ENSMUSG00000031239	Itm2a	0.212866	5.63373	0.000803623	0.00639757
ENSMUSG00000037736	Limch1	0.212698	6.62624	0.00162812	0.0114108
ENSMUSG00000019943	Atp2b1	0.21263	9.20666	0.00731731	0.0374997
ENSMUSG00000036792	Mbd5	0.21227	5.84278	0.00133375	0.00970343
ENSMUSG00000036882	Arhgap33	0.211527	7.95822	0.0015764	0.0110969
ENSMUSG00000033628	Pik3c3	0.211437	5.3618	0.00280123	0.0176987
ENSMUSG00000026718	Stam	0.211182	6.05589	0.00084484	0.00667111
ENSMUSG00000041351	Rap1gap	0.211089	7.63187	0.000251113	0.00243118
ENSMUSG00000024654	Asrgl1	0.210983	7.29972	0.000177958	0.00184752
ENSMUSG00000018412	Kansl1	0.210894	6.26479	0.00398301	0.0233297
ENSMUSG00000038860	Garnl3	0.21078	6.66927	0.000245967	0.00239182
ENSMUSG00000048148	Nwd1	0.210614	5.95348	0.0028503	0.0179182
ENSMUSG00000021194	Chga	0.210551	7.69294	0.00352897	0.0211763
ENSMUSG00000028347	Tmeff1	0.210497	6.60133	0.000414938	0.00370399
ENSMUSG00000019146	Cacng2	0.210475	6.45823	0.00644558	0.0339614
ENSMUSG00000035954	Dock4	0.210266	6.64838	0.00352146	0.0211608
ENSMUSG00000058317	Ube2e2	0.210166	6.00225	0.00142793	0.0102705
ENSMUSG00000027254	Map1a	0.210085	10.0803	0.00164559	0.0115008
ENSMUSG00000003363	Pld3	0.209796	9.34827	8.25818e-05	0.000964225
ENSMUSG00000020590	Snx13	0.209602	6.14777	0.000509907	0.00438415
ENSMUSG00000002504	Nherf2	0.209391	5.39302	0.00607357	0.0325397
ENSMUSG00000056812	St8sia3	0.209295	7.50478	0.00196089	0.0132445
ENSMUSG00000020794	Ube2g1	0.209272	6.03436	0.00156678	0.0110469
ENSMUSG00000015002	Efr3a	0.209236	6.60388	0.0044262	0.0252017
ENSMUSG00000046442	Ppm1e	0.209218	8.31012	0.0012745	0.00937097
ENSMUSG00000031229	Atrx	0.209006	7.56431	0.00105147	0.00800124
ENSMUSG00000058975	Kcnc1	0.208964	6.81984	0.00315748	0.0193695
ENSMUSG00000042846	Lrrtm3	0.20886	5.56978	0.0018305	0.0125037
ENSMUSG00000034636	Zyg11b	0.208691	8.03503	0.00117102	0.00874971
ENSMUSG00000041773	Enc1	0.208378	9.29061	0.000358241	0.00326273
ENSMUSG00000019828	Grm1	0.208166	5.32147	0.00306506	0.0189286
ENSMUSG00000031292	Cdkl5	0.208165	7.71804	0.00154955	0.0109507
ENSMUSG00000027784	Ppm1l	0.20805	7.25785	0.000725189	0.00586108
ENSMUSG00000021413	Prpf4b	0.208017	6.7892	0.000916638	0.00716377
ENSMUSG00000034163	Zfc3h1	0.207663	5.67202	0.00393194	0.0230623
ENSMUSG00000047539	Fbxo28	0.207654	5.67984	0.00382496	0.0226013
ENSMUSG00000075703	Selenoi	0.207647	6.11602	0.000999396	0.00770736
ENSMUSG00000040097	Flywch1	0.2076	6.55141	0.000831294	0.00657304
ENSMUSG00000061578	Ksr2	0.20746	6.01786	0.0074066	0.0378301
ENSMUSG00000068923	Syt11	0.207423	9.65955	0.00017641	0.0018358
ENSMUSG00000026617	Bpnt1	0.207359	5.9105	0.00153213	0.0108741
ENSMUSG00000003518	Dusp3	0.207268	7.29053	0.000368542	0.00333919
ENSMUSG00000020048	Hsp90b1	0.207191	8.28958	0.0010658	0.00808418
ENSMUSG00000026594	Ralgps2	0.207109	5.74191	0.00311839	0.019197
ENSMUSG00000023026	Dip2b	0.207091	6.05645	0.00455152	0.0257728
ENSMUSG00000038738	Shank1	0.207062	8.56054	0.00533241	0.0293113
ENSMUSG00000032422	Snx14	0.206957	5.33032	0.00375924	0.0222965
ENSMUSG00000036402	Gng12	0.206909	6.76993	0.000613209	0.0050827
ENSMUSG00000034040	Galnt17	0.206866	5.93007	0.00198141	0.0133676
ENSMUSG00000020376	Rnf130	0.20658	7.65884	0.000359451	0.00327035
ENSMUSG00000025421	Hdhd2	0.206229	6.05778	0.00252701	0.0162773
ENSMUSG00000020598	Nrcam	0.20614	8.12234	0.000177137	0.00184118
ENSMUSG00000024695	Zfp91	0.205556	7.31132	0.000657932	0.00539215
ENSMUSG00000043439	Epop	0.205453	5.00115	0.008974	0.0441739
ENSMUSG00000036053	Fmnl2	0.205381	5.76307	0.002018	0.0135883
ENSMUSG00000039662	Icmt	0.205363	6.02358	0.00156883	0.0110525
ENSMUSG00000041977	Arhgef11	0.205355	6.2584	0.0040256	0.0235042
ENSMUSG00000018199	Ro60	0.205339	5.88701	0.00203355	0.0136615
ENSMUSG00000058297	Spock2	0.205168	9.89085	0.000550902	0.00467738
ENSMUSG00000026163	Sphkap	0.205104	7.76372	0.000890728	0.00698934
ENSMUSG00000032064	Dixdc1	0.205069	6.12974	0.00110626	0.00834426
ENSMUSG00000038072	Galnt11	0.205011	5.5566	0.00343044	0.0206747
ENSMUSG00000022472	Desi1	0.204968	6.81696	0.00111993	0.0084218
ENSMUSG00000022280	Rnf19a	0.204548	5.33308	0.00813706	0.0408234
ENSMUSG00000018401	Mtmr4	0.204513	6.42362	0.00352847	0.0211763
ENSMUSG00000040430	Pitpnc1	0.204229	6.35887	0.00447669	0.0254231
ENSMUSG00000020015	Cdk17	0.204183	7.32428	0.00826058	0.0413472
ENSMUSG00000028020	Glrb	0.203815	7.47235	0.000638201	0.00525947
ENSMUSG00000034602	Mon2	0.203676	6.11049	0.00294552	0.018411
ENSMUSG00000014602	Kif1a	0.203405	10.0991	0.00092571	0.007225
ENSMUSG00000026024	Als2	0.203189	5.63802	0.00432585	0.0247672
ENSMUSG00000048388	Fam171b	0.202158	8.4225	0.000267455	0.00255828
ENSMUSG00000022905	Kpna1	0.202001	7.02396	0.000523742	0.00447892
ENSMUSG00000020827	Mink1	0.201997	7.96998	0.000577086	0.00484985
ENSMUSG00000022415	Syngr1	0.201886	9.46902	0.00017967	0.00186198
ENSMUSG00000032186	Tmod2	0.201667	8.93577	0.00179836	0.0123391
ENSMUSG00000101249	Gm29216	0.201405	9.76524	0.00149033	0.0106331
ENSMUSG00000027223	Mapk8ip1	0.201219	8.52664	0.000772633	0.0061846
ENSMUSG00000045767	B230219D22Rik	0.20097	6.98977	0.00222293	0.0147136
ENSMUSG00000054814	Usp46	0.200942	6.93521	0.00111583	0.00840186
ENSMUSG00000029004	Kmt2e	0.200721	6.64321	0.00152383	0.0108269
ENSMUSG00000061273	Mmgt1	0.200711	5.72712	0.00396448	0.0232376
ENSMUSG00000026469	Xpr1	0.200416	6.9595	0.0073668	0.0376462
ENSMUSG00000039943	Plcb4	0.200335	5.34653	0.00659721	0.034625
ENSMUSG00000073678	Pgap1	0.200291	5.89499	0.00202686	0.0136331
ENSMUSG00000021062	Rab15	0.200285	8.1338	0.000413479	0.00369661
ENSMUSG00000021730	Hcn1	0.200261	6.10378	0.00455436	0.0257805
ENSMUSG00000029212	Gabrb1	0.200168	7.1046	0.00412789	0.0239232
ENSMUSG00000042628	Zfyve1	0.200166	5.42095	0.00448464	0.02546
ENSMUSG00000023033	Scn8a	0.200077	7.89353	0.00532756	0.0293049
ENSMUSG00000020982	Nemf	0.199988	5.33085	0.00461915	0.0260799
ENSMUSG00000021578	Ccdc127	0.199974	5.94925	0.00115704	0.00866372
ENSMUSG00000021991	Cacna2d3	0.19986	6.94764	0.00116507	0.00872009
ENSMUSG00000020964	Sel1l	0.19982	7.23322	0.00102341	0.00783735
ENSMUSG00000001441	Npepps	0.199766	7.25457	0.00209465	0.0139969
ENSMUSG00000022964	Tmem50b	0.199736	6.68054	0.00171489	0.0118949
ENSMUSG00000015981	Stk32c	0.19972	6.52152	0.00172783	0.0119657
ENSMUSG00000034912	Mdga2	0.199377	5.5674	0.00732128	0.0374997
ENSMUSG00000036452	Arhgap26	0.199048	6.80771	0.00123153	0.00913553
ENSMUSG00000036450	Hif1an	0.198886	5.76338	0.0089304	0.043984
ENSMUSG00000051674	Dcun1d4	0.198811	6.75815	0.000438455	0.0038803
ENSMUSG00000054364	Rhob	0.198738	8.22406	0.00116715	0.00873196
ENSMUSG00000031864	Ints10	0.198312	5.52792	0.00568903	0.0308667
ENSMUSG00000040524	Zfp609	0.198152	5.60816	0.00796643	0.0401739
ENSMUSG00000021301	Hecw1	0.1981	6.33469	0.00224672	0.0148403
ENSMUSG00000074093	Svip	0.197925	5.2915	0.0079895	0.0402582
ENSMUSG00000020189	Osbpl8	0.197886	6.56727	0.00474342	0.0266355
ENSMUSG00000038886	Man2a2	0.197854	6.94018	0.00439729	0.0250534
ENSMUSG00000034593	Myo5a	0.197301	8.63137	0.000726185	0.00586439
ENSMUSG00000070923	Klhl9	0.197194	6.82563	0.000475721	0.00416797
ENSMUSG00000046093	Hpcal4	0.197128	9.63318	0.000514885	0.00442478
ENSMUSG00000041852	Tcf20	0.196471	6.6593	0.00557725	0.030411
ENSMUSG00000060534	Dcc	0.19646	5.12951	0.0105194	0.0499014
ENSMUSG00000032826	Ank2	0.196458	9.35311	0.00255276	0.016415
ENSMUSG00000040859	Bsdc1	0.19643	5.65201	0.00472233	0.0265427
ENSMUSG00000050556	Kcnb1	0.196263	7.55697	0.00564938	0.0307182
ENSMUSG00000022623	Shank3	0.196121	7.84725	0.002105	0.0140553
ENSMUSG00000025576	Rbfox3	0.196089	7.98462	0.00127036	0.00935378
ENSMUSG00000032777	Gtf3c1	0.195901	6.76872	0.00307615	0.0189837
ENSMUSG00000029309	Sparcl1	0.195597	10.5489	0.000810716	0.00644581
ENSMUSG00000055204	Ankrd17	0.1955	7.05926	0.00194059	0.0131327
ENSMUSG00000029063	Nadk	0.19543	6.1044	0.00159191	0.0111881
ENSMUSG00000022332	Khdrbs3	0.195421	6.90496	0.0022408	0.0148135
ENSMUSG00000021669	Cert1	0.195323	5.95893	0.00444473	0.0252826
ENSMUSG00000020684	Rasl10b	0.19503	8.08785	0.00149733	0.010669
ENSMUSG00000020571	Pdia6	0.194714	6.57667	0.00683765	0.0355777
ENSMUSG00000028096	Gpr89	0.194277	5.03471	0.00940148	0.0457764
ENSMUSG00000039976	Tbc1d16	0.19427	6.49982	0.0029423	0.0183975
ENSMUSG00000064351	mt-Co1	0.194232	14.3266	0.00841332	0.0419564
ENSMUSG00000041231	Ublcp1	0.194131	5.2677	0.00655887	0.0344547
ENSMUSG00000024588	Fech	0.193892	5.67675	0.00373253	0.0222022
ENSMUSG00000009073	Nf2	0.193825	7.06366	0.0032645	0.0199128
ENSMUSG00000039114	Nrn1	0.193768	7.57992	0.00186405	0.0126932
ENSMUSG00000004360	9330159F19Rik	0.193714	6.33175	0.00575256	0.0311121
ENSMUSG00000052516	Robo2	0.193591	7.37985	0.00063307	0.00523
ENSMUSG00000009569	Mrtfb	0.19323	7.61185	0.00122543	0.00909416
ENSMUSG00000026490	Cdc42bpa	0.193108	7.95021	0.00123299	0.00914251
ENSMUSG00000002580	Mien1	0.192691	5.55956	0.00719972	0.0370652
ENSMUSG00000038546	Ranbp9	0.192672	6.25564	0.00154861	0.0109507
ENSMUSG00000069729	Arid1b	0.192186	6.41333	0.00470431	0.0264584
ENSMUSG00000029461	Fam168a	0.192156	8.46737	0.00195689	0.0132328
ENSMUSG00000027350	Chgb	0.191955	8.85212	0.000741199	0.00597668
ENSMUSG00000068566	Myadm	0.191894	6.77722	0.00552001	0.0301551
ENSMUSG00000029250	Polr2b	0.191802	5.98248	0.0026708	0.0170282
ENSMUSG00000039704	Lmbrd2	0.191785	6.59546	0.00229646	0.0150807
ENSMUSG00000003410	Elavl3	0.191414	7.95948	0.0022192	0.0146946
ENSMUSG00000025958	Creb1	0.191395	5.81957	0.0057538	0.0311121
ENSMUSG00000046329	Slc25a23	0.191335	8.67042	0.000437328	0.00387228
ENSMUSG00000032875	Arhgef17	0.191288	7.10188	0.00330022	0.0200764
ENSMUSG00000024502	Jakmip2	0.191109	5.93195	0.00413106	0.0239252
ENSMUSG00000022008	Gpalpp1	0.19109	5.3518	0.00714313	0.0368389
ENSMUSG00000024479	Mal2	0.191063	7.54756	0.000817086	0.00648412
ENSMUSG00000006010	Odr4	0.190685	5.50126	0.0102988	0.0490944
ENSMUSG00000022438	Parvb	0.190562	5.46342	0.00558297	0.0304203
ENSMUSG00000021198	Unc79	0.190453	5.80707	0.00939274	0.0457517
ENSMUSG00000015143	Actn1	0.190422	6.41506	0.00269465	0.017149
ENSMUSG00000024589	Nedd4l	0.190385	7.04406	0.00674162	0.0352492
ENSMUSG00000033039	Micall1	0.190368	5.72591	0.00406444	0.023678
ENSMUSG00000033981	Gria2	0.19013	9.16439	0.00794952	0.0401118
ENSMUSG00000044072	Eml6	0.190127	5.51203	0.00799003	0.0402582
ENSMUSG00000048458	Inka2	0.190106	6.84883	0.00577177	0.03119
ENSMUSG00000025437	Usp33	0.189943	7.03481	0.000943513	0.00733778
ENSMUSG00000041112	Elmo1	0.189786	6.34168	0.00184062	0.0125679
ENSMUSG00000039953	Clstn1	0.189766	10.3866	0.000330655	0.00306569
ENSMUSG00000031066	Usp11	0.189469	6.64006	0.00415662	0.024034
ENSMUSG00000021703	Serinc5	0.189099	6.42017	0.00864476	0.0429195
ENSMUSG00000049550	Clip1	0.188681	6.82866	0.0033769	0.0204294
ENSMUSG00000033352	Map2k4	0.188669	7.71125	0.000516307	0.0044283
ENSMUSG00000064360	mt-Nd3	0.188627	10.519	0.0042663	0.0245467
ENSMUSG00000026812	Tsc1	0.188367	5.99857	0.00667208	0.0349655
ENSMUSG00000038026	Kcnj9	0.188323	7.25777	0.00154018	0.0109165
ENSMUSG00000025558	Dock9	0.18819	7.44802	0.00269309	0.0171453
ENSMUSG00000026827	Gpd2	0.187713	6.84998	0.00946422	0.0459923
ENSMUSG00000053644	Aldh7a1	0.187679	6.10909	0.00171818	0.011913
ENSMUSG00000015341	Golga7	0.187632	6.62889	0.00103715	0.00792174
ENSMUSG00000051586	Mical3	0.187607	6.64986	0.00902079	0.0443793
ENSMUSG00000044117	Bmerb1	0.187544	7.84138	0.000788426	0.0062995
ENSMUSG00000027589	Pcmtd2	0.187498	6.27727	0.00374592	0.0222526
ENSMUSG00000009013	Dynll1	0.187343	8.11389	0.0015896	0.0111808
ENSMUSG00000024597	Slc12a2	0.1869	6.0262	0.0103209	0.0491833
ENSMUSG00000032042	Srpr	0.186598	5.87302	0.00342396	0.020657
ENSMUSG00000029231	Pdgfra	0.18655	6.51553	0.00359668	0.0215285
ENSMUSG00000017670	Elmo2	0.186522	7.21792	0.0027987	0.0176891
ENSMUSG00000036052	Dnajb5	0.186521	7.48337	0.00261569	0.0167316
ENSMUSG00000034557	Zfyve9	0.186468	6.33105	0.00273635	0.0173636
ENSMUSG00000021775	Nr1d2	0.1864	6.30384	0.0086352	0.0429163
ENSMUSG00000024096	Ralbp1	0.186064	5.96681	0.00830026	0.0414871
ENSMUSG00000035891	Cerk	0.185929	5.83887	0.00554606	0.0302691
ENSMUSG00000058624	Gda	0.185867	8.68718	0.00062637	0.00518442
ENSMUSG00000037541	Shank2	0.185752	7.66259	0.00308066	0.0190048
ENSMUSG00000026353	Ubxn4	0.185725	6.21883	0.00296178	0.0184808
ENSMUSG00000048756	Foxo3	0.185529	6.25839	0.00432875	0.0247757
ENSMUSG00000024241	Sos1	0.185443	5.49604	0.0072096	0.0371052
ENSMUSG00000028524	Sgip1	0.185339	7.31666	0.00113197	0.00850142
ENSMUSG00000036333	Kidins220	0.184686	8.10072	0.00283798	0.01786
ENSMUSG00000026737	Pip4k2a	0.184287	5.98791	0.00808056	0.0406208
ENSMUSG00000024773	Atg2a	0.184211	5.43604	0.00939129	0.0457517
ENSMUSG00000031343	Gabra3	0.184136	6.93196	0.00300537	0.0186868
ENSMUSG00000029455	Aldh2	0.183967	5.56018	0.00813717	0.0408234
ENSMUSG00000032115	Hyou1	0.183838	6.58583	0.0053506	0.0293763
ENSMUSG00000036667	Tcaf1	0.18357	8.4001	0.00109775	0.00830141
ENSMUSG00000040697	Dnajc16	0.183557	5.69287	0.00835975	0.0417606
ENSMUSG00000027312	Atrn	0.183506	7.7673	0.00402606	0.0235042
ENSMUSG00000000247	Lhx2	0.183491	5.71635	0.00992775	0.0477022
ENSMUSG00000021557	Agtpbp1	0.183259	7.39427	0.00137754	0.00996431
ENSMUSG00000004798	Ulk2	0.183189	6.99793	0.00178549	0.0122824
ENSMUSG00000055013	Agap1	0.182936	7.10261	0.00879217	0.0434743
ENSMUSG00000009112	Bcl2l13	0.182485	5.76261	0.00706527	0.0365114
ENSMUSG00000040550	Otud6b	0.182376	6.14205	0.00331497	0.0201411
ENSMUSG00000031748	Gnao1	0.182135	9.8638	0.00094946	0.00736768
ENSMUSG00000026158	Ogfrl1	0.182091	6.96351	0.0079927	0.0402601
ENSMUSG00000027406	Idh3b	0.181875	7.31124	0.0059589	0.032051
ENSMUSG00000037646	Vps13b	0.181617	5.69699	0.00405074	0.0236239
ENSMUSG00000029723	Tsc22d4	0.18139	6.36057	0.00389343	0.0228824
ENSMUSG00000062760	Shisal1	0.181359	6.09281	0.00608036	0.0325562
ENSMUSG00000032087	Dscaml1	0.181297	5.59478	0.0101649	0.0486415
ENSMUSG00000031299	Pdha1	0.181086	8.32581	0.000938443	0.00730484
ENSMUSG00000027419	Pcsk2	0.180609	8.563	0.00120113	0.00893653
ENSMUSG00000057230	Aak1	0.180081	8.54992	0.00116884	0.0087371
ENSMUSG00000021302	Ggps1	0.179898	5.69377	0.00829107	0.0414648
ENSMUSG00000025862	Stag2	0.17983	6.02029	0.00596039	0.032051
ENSMUSG00000021987	Mtmr6	0.179817	6.96761	0.00271812	0.0172636
ENSMUSG00000024122	Pdpk1	0.179789	6.77257	0.00430128	0.0246741
ENSMUSG00000020687	Cdc27	0.179748	5.9531	0.0104984	0.049829
ENSMUSG00000026074	Map4k4	0.179575	7.3586	0.00390013	0.0229064
ENSMUSG00000044252	Osbpl1a	0.179256	8.43437	0.00185715	0.012661
ENSMUSG00000026185	Igfbp5	0.179095	7.58142	0.00768288	0.0389684
ENSMUSG00000005886	Ncoa2	0.178498	6.1745	0.00748216	0.0381381
ENSMUSG00000021061	Sptb	0.178498	6.93526	0.00531126	0.0292336
ENSMUSG00000032470	Mras	0.178429	7.71052	0.00350508	0.021081
ENSMUSG00000038170	Pde4dip	0.178427	7.79821	0.00281536	0.0177751
ENSMUSG00000061751	Kalrn	0.178321	8.73698	0.00628169	0.0333588
ENSMUSG00000037536	Fbxo34	0.178084	5.98773	0.00638798	0.0337494
ENSMUSG00000021559	Dapk1	0.177904	6.69368	0.00829346	0.0414649
ENSMUSG00000041763	Tpp2	0.177853	5.86572	0.00489234	0.0273403
ENSMUSG00000049100	Pcdh10	0.17785	7.55916	0.005337	0.02932
ENSMUSG00000001036	Epn2	0.177842	6.76833	0.00329494	0.0200513
ENSMUSG00000021794	Glud1	0.177716	7.95288	0.00279225	0.0176674
ENSMUSG00000031626	Sorbs2	0.177588	7.26658	0.00541956	0.0296619
ENSMUSG00000029104	Htt	0.177132	7.13468	0.00731859	0.0374997
ENSMUSG00000050947	Amigo1	0.176951	6.38207	0.00336214	0.0203541
ENSMUSG00000030168	Adipor2	0.176929	6.03963	0.0102087	0.0487714
ENSMUSG00000022208	Jph4	0.176838	8.68529	0.00126102	0.00930697
ENSMUSG00000040242	Fgfr1op2	0.176641	6.33034	0.00621076	0.0330523
ENSMUSG00000005683	Cs	0.176501	8.20659	0.00186299	0.0126909
ENSMUSG00000030451	Herc2	0.176383	7.85555	0.00881397	0.043533
ENSMUSG00000025025	Mxi1	0.17585	6.23559	0.00473977	0.0266236
ENSMUSG00000001211	Agpat3	0.175618	8.25221	0.00118127	0.00880374
ENSMUSG00000024622	Hmgxb3	0.175571	5.56495	0.00866141	0.0429612
ENSMUSG00000040782	Cop1	0.175381	5.98893	0.00377707	0.0223712
ENSMUSG00000091264	Smim13	0.175319	7.93207	0.00446679	0.0253916
ENSMUSG00000020463	Ppp4r3b	0.175248	5.75448	0.0051332	0.0284683
ENSMUSG00000045216	Hs6st1	0.175124	6.47721	0.0027165	0.017263
ENSMUSG00000028926	Cdk14	0.174923	7.26644	0.0036992	0.0220291
ENSMUSG00000038664	Herc1	0.174679	7.73151	0.00626581	0.0332947
ENSMUSG00000029516	Cit	0.174592	6.62699	0.010453	0.0496943
ENSMUSG00000025871	4833439L19Rik	0.174002	7.03657	0.00408879	0.0237595
ENSMUSG00000023927	Satb1	0.173433	6.8576	0.0035771	0.0214186
ENSMUSG00000047126	Cltc	0.172958	9.04657	0.00380371	0.0224985
ENSMUSG00000018501	Ncor1	0.172931	7.48736	0.00405197	0.0236239
ENSMUSG00000020321	Mdh1	0.172912	9.41497	0.00129173	0.00946979
ENSMUSG00000032320	Rcn2	0.17277	6.83123	0.0034186	0.0206389
ENSMUSG00000022296	Baalc	0.172497	7.30393	0.00267283	0.0170349
ENSMUSG00000021748	Pdhb	0.172495	7.25101	0.00213507	0.0141965
ENSMUSG00000040125	Gpr26	0.172413	7.84347	0.00616513	0.0328494
ENSMUSG00000028194	Ddah1	0.172314	7.1077	0.00500072	0.0278482
ENSMUSG00000059273	Zc3h4	0.172068	5.88399	0.00751892	0.0382587
ENSMUSG00000029403	Cdkl2	0.172047	6.38261	0.00681278	0.0354905
ENSMUSG00000068798	Rap1a	0.171956	5.93962	0.00682496	0.0355308
ENSMUSG00000028136	Snx27	0.171948	6.82485	0.00641459	0.0338593
ENSMUSG00000102918	Pcdhgc3	0.171703	6.79549	0.00663084	0.0347805
ENSMUSG00000064115	Cadm2	0.171524	8.42585	0.00629342	0.0333908
ENSMUSG00000041570	Camsap2	0.171411	7.48726	0.00646347	0.0340353
ENSMUSG00000031696	Vps35	0.171295	7.4621	0.00387378	0.0228128
ENSMUSG00000007950	Abhd8	0.171214	7.30134	0.00243546	0.0158097
ENSMUSG00000024743	Syt7	0.171048	8.36922	0.00278929	0.0176615
ENSMUSG00000027624	Epb41l1	0.170957	8.82461	0.00386146	0.0227709
ENSMUSG00000026426	Arl8a	0.170681	7.75803	0.00497635	0.0277389
ENSMUSG00000035226	Rims4	0.170413	7.17083	0.00600721	0.0322632
ENSMUSG00000026576	Atp1b1	0.169955	10.7425	0.00382676	0.0226043
ENSMUSG00000019194	Scn1b	0.169922	7.54063	0.00303169	0.0187954
ENSMUSG00000016349	Eef1a2	0.16984	9.64084	0.0033898	0.0205003
ENSMUSG00000028032	Papss1	0.169831	6.37043	0.00521004	0.0287941
ENSMUSG00000029101	Rgs12	0.169738	5.82907	0.00680354	0.0354529
ENSMUSG00000029765	Plxna4	0.16949	6.90761	0.00925042	0.0452421
ENSMUSG00000030861	Acadsb	0.169437	5.66116	0.0104983	0.049829
ENSMUSG00000033769	Exoc6b	0.169416	6.37918	0.0063968	0.0337858
ENSMUSG00000039058	Ak5	0.168747	7.19621	0.00485017	0.0271306
ENSMUSG00000064061	Dzip3	0.168533	6.16039	0.00763552	0.0387394
ENSMUSG00000022892	App	0.168334	10.3599	0.00377919	0.0223762
ENSMUSG00000005981	Trap1	0.16828	5.80977	0.00849283	0.0422567
ENSMUSG00000039431	Mtmr7	0.167973	5.97566	0.00866625	0.042973
ENSMUSG00000079037	Prnp	0.167801	9.18155	0.00300564	0.0186868
ENSMUSG00000034088	Hdlbp	0.167722	7.73675	0.00529207	0.0291624
ENSMUSG00000037747	Phyhipl	0.166902	7.54061	0.00483145	0.0270432
ENSMUSG00000028656	Cap1	0.166361	7.75867	0.00484692	0.0271211
ENSMUSG00000029120	Ppp2r2c	0.166349	9.38632	0.00300745	0.0186915
ENSMUSG00000020070	Rufy2	0.1663	6.23325	0.00796624	0.0401739
ENSMUSG00000020647	Ncoa1	0.166049	6.49948	0.00768939	0.0389902
ENSMUSG00000026482	Rgl1	0.165679	6.53963	0.0061159	0.0326866
ENSMUSG00000055254	Ntrk2	0.165427	9.09389	0.00937532	0.0456998
ENSMUSG00000022523	Fgf12	0.165236	7.35134	0.00279103	0.0176661
ENSMUSG00000058690	Ccser2	0.165179	6.81946	0.00673919	0.0352492
ENSMUSG00000040712	Camta2	0.165136	7.84011	0.00314821	0.019333
ENSMUSG00000055022	Cntn1	0.165099	8.92669	0.00423071	0.0243899
ENSMUSG00000005417	Mprip	0.16506	8.21677	0.00328793	0.0200267
ENSMUSG00000019951	Bltp3b	0.164751	6.51283	0.00509433	0.0282775
ENSMUSG00000027692	Tnik	0.164667	7.68995	0.00841898	0.0419727
ENSMUSG00000024370	Cdc23	0.164582	5.71656	0.0100596	0.0482036
ENSMUSG00000021147	Wdr37	0.164482	6.207	0.00968711	0.0467512
ENSMUSG00000031467	Agpat5	0.164268	6.20571	0.00822733	0.0411931
ENSMUSG00000070498	Tmem132b	0.164123	7.36639	0.00613351	0.0327507
ENSMUSG00000022658	Tagln3	0.164008	7.62131	0.00413222	0.0239252
ENSMUSG00000022995	Enah	0.164005	7.14875	0.00776686	0.0393033
ENSMUSG00000020436	Gabrg2	0.163665	7.37778	0.00942781	0.0458663
ENSMUSG00000029763	Exoc4	0.163517	6.19952	0.0077466	0.0392235
ENSMUSG00000052459	Atp6v1a	0.163441	8.81707	0.00945064	0.0459518
ENSMUSG00000000223	Drp2	0.162959	6.37183	0.00604178	0.0324075
ENSMUSG00000040536	Necab1	0.162709	7.24237	0.00927209	0.0453227
ENSMUSG00000036295	Lrrn3	0.162571	6.16176	0.0070943	0.0366302
ENSMUSG00000021259	Cyp46a1	0.162376	7.4645	0.00582465	0.0314272
ENSMUSG00000060373	Hnrnpc	0.162237	7.61864	0.00807786	0.0406189
ENSMUSG00000044667	Plppr4	0.161829	8.52659	0.00696515	0.0361124
ENSMUSG00000048264	Dip2c	0.16164	6.72416	0.0105351	0.0499356
ENSMUSG00000020340	Cyfip2	0.161082	9.10139	0.00817907	0.0410101
ENSMUSG00000005469	Prkaca	0.160652	7.62877	0.0043684	0.0249375
ENSMUSG00000025266	Gnl3l	0.160501	7.78519	0.00642745	0.033917
ENSMUSG00000032503	Arpp21	0.160478	9.01946	0.00998879	0.0479167
ENSMUSG00000042688	Mapk6	0.160444	6.28291	0.00842603	0.0419959
ENSMUSG00000034187	Nsf	0.16027	9.51432	0.00389147	0.0228785
ENSMUSG00000025318	Jph3	0.159737	7.45997	0.00433471	0.0247856
ENSMUSG00000020368	Canx	0.159667	8.48383	0.0102547	0.0489242
ENSMUSG00000044221	Grsf1	0.159356	6.44044	0.0101212	0.0484589
ENSMUSG00000069601	Ank3	0.15916	7.80736	0.00970104	0.0468055
ENSMUSG00000038453	Srcin1	0.158905	8.6753	0.0091691	0.0449322
ENSMUSG00000028991	Mtor	0.158848	6.64871	0.0101805	0.0486768
ENSMUSG00000003273	Car11	0.158305	6.79912	0.0070249	0.0363683
ENSMUSG00000043670	Diras1	0.158234	7.2109	0.00653487	0.0343492
ENSMUSG00000024109	Nrxn1	0.158168	8.76987	0.0073248	0.0374997
ENSMUSG00000027438	Napb	0.15808	8.68542	0.00624964	0.033239
ENSMUSG00000052889	Prkcb	0.157835	8.16935	0.00816382	0.0409454
ENSMUSG00000019877	Serinc1	0.157162	10.0243	0.00800025	0.0402865
ENSMUSG00000025234	Arih1	0.156886	6.76443	0.00653944	0.034363
ENSMUSG00000054843	Atrnl1	0.156597	7.07641	0.00874163	0.043266
ENSMUSG00000051675	Trim32	0.15628	7.60087	0.00564777	0.0307182
ENSMUSG00000004319	Clcn3	0.155748	7.53818	0.00743473	0.0379295
ENSMUSG00000033389	Arhgap44	0.154395	7.23329	0.00566089	0.0307617
ENSMUSG00000032244	Fem1b	0.154126	7.42174	0.0070388	0.0364129
ENSMUSG00000022477	Aco2	0.154097	8.91559	0.00718338	0.0370028
ENSMUSG00000035969	Rusc2	0.153753	7.0814	0.00758975	0.0385631
ENSMUSG00000049470	Aff4	0.153086	7.56566	0.0093938	0.0457517
ENSMUSG00000025369	Smarcc2	0.152812	7.91592	0.0065046	0.0342107
ENSMUSG00000028618	Tmem59	0.152763	7.10006	0.00725312	0.0372766
ENSMUSG00000040785	Ttc3	0.152528	9.77128	0.00703974	0.0364129
ENSMUSG00000035805	Mlc1	0.152213	6.96986	0.00642992	0.0339198
ENSMUSG00000041329	Atp1b2	0.151875	8.87049	0.00681867	0.0355106
ENSMUSG00000037351	Actr1b	0.151263	7.91179	0.00525665	0.0289969
ENSMUSG00000018965	Ywhah	0.151083	10.0296	0.00524881	0.0289627
ENSMUSG00000039252	Lgi2	0.150663	7.00914	0.00934357	0.0456085
ENSMUSG00000028152	Tspan5	0.149784	7.20115	0.00906756	0.0445691
ENSMUSG00000070570	Slc17a7	0.149778	10.4841	0.00599477	0.0322161
ENSMUSG00000026825	Dnm1	0.14952	9.92629	0.00685471	0.0356347
ENSMUSG00000034958	Atcay	0.149469	7.99265	0.00728362	0.0374002
ENSMUSG00000013921	Clip3	0.149314	9.02375	0.00754182	0.0383418
ENSMUSG00000036564	Ndrg4	0.149032	10.8679	0.00507107	0.0281862
ENSMUSG00000028557	Rnf11	0.147396	7.70492	0.00809162	0.0406647
ENSMUSG00000029838	Ptn	0.145558	9.27801	0.00968121	0.0467356
ENSMUSG00000036529	Sbf1	0.143069	7.04274	0.0104386	0.049653
ENSMUSG00000008153	Clstn3	0.14247	8.66167	0.00949621	0.0460966
ENSMUSG00000029106	Add1	0.141498	8.49745	0.00880816	0.0435288

## Sheet: up-regulated genes
Transcripts level changes in Cnp-Cre; RelA cKO cerebral cortex (up-regulated genes, FDR<0.05)
gene ID	gene symbol	logFC	logCPM	PValue	FDR
ENSMUSG00000069045	Ddx3y	-13.6824	4.6511	0	0
ENSMUSG00000069049	Eif2s3y	-13.4746	4.44349	1.28356e-292	7.49342e-289
ENSMUSG00000056673	Kdm5d	-12.6426	3.61625	4.75565e-249	2.08226e-245
ENSMUSG00000068457	Uty	-11.6402	2.62363	3.92989e-168	7.64757e-165
ENSMUSG00000062593	Gm49339	-9.6158	0.645372	3.27601e-50	5.41284e-48
ENSMUSG00000035042	Ccl5	-9.31671	4.3914	4.46872e-119	3.13061e-116
ENSMUSG00000034855	Cxcl10	-6.99969	3.05198	4.53088e-123	3.60699e-120
ENSMUSG00000091649	Phf11b	-6.83329	1.70188	1.08601e-64	2.53604e-62
ENSMUSG00000056071	S100a9	-6.6783	2.01784	5.22579e-23	4.33765e-21
ENSMUSG00000056054	S100a8	-6.58122	1.92143	3.88357e-24	3.36276e-22
ENSMUSG00000043263	Ifi209	-6.53896	2.20321	4.33088e-77	1.37911e-74
ENSMUSG00000023078	Cxcl13	-6.53131	0.279358	1.0673e-26	1.03274e-24
ENSMUSG00000027514	Zbp1	-6.47424	2.14108	1.36225e-71	3.91122e-69
ENSMUSG00000073409	H2-Q6	-6.34381	2.97354	5.82364e-102	3.29017e-99
ENSMUSG00000029561	Oasl2	-6.33962	6.70728	4.10194e-151	5.52626e-148
ENSMUSG00000018930	Ccl4	-6.31107	0.0737102	1.83951e-18	1.16308e-16
ENSMUSG00000035692	Isg15	-6.2229	4.75862	2.08784e-142	2.2854e-139
ENSMUSG00000032661	Oas3	-6.14904	1.4864	1.88913e-49	2.98074e-47
ENSMUSG00000066677	Ifi208	-6.13691	0.380773	9.3467e-35	1.09132e-32
ENSMUSG00000079298	Klrb1b	-6.01645	0.913174	1.55875e-29	1.62252e-27
ENSMUSG00000034459	Ifit1	-5.95702	5.67766	9.4957e-165	1.66308e-161
ENSMUSG00000029417	Cxcl9	-5.95494	0.569396	3.72499e-44	5.43663e-42
ENSMUSG00000099974	Bcl2a1d	-5.89425	0.153877	5.71729e-36	6.81174e-34
ENSMUSG00000044703	Phf11a	-5.8783	0.142842	2.1862e-24	1.93379e-22
ENSMUSG00000037849	Ifi206	-5.86808	1.01085	7.62206e-43	1.06794e-40
ENSMUSG00000024675	Ms4a4c	-5.81772	0.440126	3.90258e-19	2.55992e-17
ENSMUSG00000030789	Itgax	-5.77661	2.69988	2.12061e-48	3.28675e-46
ENSMUSG00000000204	Slfn4	-5.75613	0.907864	2.64731e-43	3.76952e-41
ENSMUSG00000028037	Ifi44	-5.69382	3.69442	2.87233e-88	1.09361e-85
ENSMUSG00000025498	Irf7	-5.66826	5.15569	8.75929e-145	1.09579e-141
ENSMUSG00000078921	Tgtp2	-5.66462	2.72051	4.29437e-139	4.17842e-136
ENSMUSG00000066861	Oas1g	-5.5836	1.1986	1.45335e-60	3.18176e-58
ENSMUSG00000030107	Usp18	-5.54718	4.03518	5.004e-122	3.81044e-119
ENSMUSG00000047798	Cd300lf	-5.54327	0.698476	1.20741e-36	1.4892e-34
ENSMUSG00000059089	Fcgr4	-5.52525	2.17654	4.7038e-68	1.24822e-65
ENSMUSG00000060550	H2-Q7	-5.52068	2.62999	9.20363e-68	2.40586e-65
ENSMUSG00000073491	Ifi213	-5.506	1.34573	1.38259e-42	1.89177e-40
ENSMUSG00000041827	Oasl1	-5.4297	2.00828	6.03982e-53	1.09053e-50
ENSMUSG00000068245	Phf11d	-5.41374	2.34905	2.25383e-60	4.75585e-58
ENSMUSG00000020641	Rsad2	-5.39058	3.33613	3.80883e-132	3.33539e-129
ENSMUSG00000029322	Plac8	-5.35439	1.76026	8.54804e-54	1.59266e-51
ENSMUSG00000073489	Ifi204	-5.3522	3.3067	3.51407e-113	2.27946e-110
ENSMUSG00000032690	Oas2	-5.34194	2.66686	1.5461e-74	4.75061e-72
ENSMUSG00000035352	Ccl12	-5.20347	2.80487	6.54946e-67	1.6156e-64
ENSMUSG00000054072	Iigp1	-5.17212	4.42432	8.11255e-214	2.84166e-210
ENSMUSG00000090231	Cfb	-5.14889	3.30811	2.7657e-104	1.67029e-101
ENSMUSG00000035385	Ccl2	-5.06144	0.0257326	8.49893e-21	6.38842e-19
ENSMUSG00000073555	Iigp1c	-5.01143	1.89825	3.73786e-55	7.19395e-53
ENSMUSG00000052776	Oas1a	-5.01071	3.13553	3.60165e-83	1.26159e-80
ENSMUSG00000082292	Gm12250	-4.98067	0.380119	1.57083e-30	1.67753e-28
ENSMUSG00000078763	Slfn1	-4.95342	0.150742	7.47123e-30	7.8826e-28
ENSMUSG00000004296	Il12b	-4.91032	0.331077	1.46856e-17	8.89976e-16
ENSMUSG00000026822	Lcn2	-4.88142	3.75189	2.77868e-102	1.62219e-99
ENSMUSG00000026536	Ifi211	-4.873	1.88104	1.04904e-49	1.7012e-47
ENSMUSG00000068606	Gm4841	-4.814	0.226262	1.37985e-31	1.51992e-29
ENSMUSG00000105096	Gbp10	-4.71442	0.0569824	1.67387e-24	1.49572e-22
ENSMUSG00000074151	Nlrc5	-4.7014	2.64355	1.31558e-90	5.61977e-88
ENSMUSG00000037921	Ddx60	-4.68054	3.03489	3.48059e-95	1.64754e-92
ENSMUSG00000079017	Ifi27l2a	-4.66711	3.54689	8.41941e-60	1.75545e-57
ENSMUSG00000074896	Ifit3	-4.65086	5.80507	1.49716e-164	2.38374e-161
ENSMUSG00000000386	Mx1	-4.62195	3.02919	1.70782e-92	7.66941e-90
ENSMUSG00000062488	Ifit3b	-4.5917	4.27329	7.98702e-95	3.68117e-92
ENSMUSG00000032484	Ngp	-4.57437	0.208383	1.04161e-10	3.72302e-09
ENSMUSG00000046718	Bst2	-4.49283	5.19843	2.42061e-92	1.05987e-89
ENSMUSG00000079362	Gm43302	-4.33462	3.55504	3.27424e-132	3.01816e-129
ENSMUSG00000000682	Cd52	-4.28886	3.60324	3.28396e-81	1.12775e-78
ENSMUSG00000029605	Oas1b	-4.24877	1.58006	6.40002e-43	9.03951e-41
ENSMUSG00000078920	Ifi47	-4.22381	2.58401	1.04829e-67	2.69996e-65
ENSMUSG00000004707	Ly9	-4.21363	0.858547	3.90285e-23	3.28627e-21
ENSMUSG00000073490	Ifi207	-4.14665	1.91512	3.81778e-55	7.26788e-53
ENSMUSG00000035929	H2-Q4	-4.13046	3.60822	4.43756e-100	2.35514e-97
ENSMUSG00000000982	Ccl3	-4.07109	0.154709	2.57435e-12	1.08906e-10
ENSMUSG00000070327	Rnf213	-4.01838	6.29192	1.15273e-142	1.34592e-139
ENSMUSG00000075010	AW112010	-3.96735	0.370494	9.10089e-26	8.52369e-24
ENSMUSG00000104713	Gbp6	-3.96292	3.05763	7.85577e-114	5.29177e-111
ENSMUSG00000033355	Rtp4	-3.92875	3.97441	2.13274e-97	1.06722e-94
ENSMUSG00000028268	Gbp3	-3.86746	4.93177	1.55854e-95	7.58229e-93
ENSMUSG00000015340	Cybb	-3.86726	2.32133	2.43311e-36	2.95927e-34
ENSMUSG00000078922	Tgtp1	-3.83424	2.17754	1.20948e-47	1.85814e-45
ENSMUSG00000020437	Myo1g	-3.83365	0.988566	7.71937e-28	7.63825e-26
ENSMUSG00000079293	Clec7a	-3.83346	0.732397	1.46212e-26	1.40701e-24
ENSMUSG00000040483	Xaf1	-3.82746	2.89587	7.61293e-74	2.29884e-71
ENSMUSG00000018920	Cxcl16	-3.81686	3.23771	7.13632e-64	1.62319e-61
ENSMUSG00000040528	Milr1	-3.80154	0.403614	4.4549e-20	3.12093e-18
ENSMUSG00000079363	Gbp4	-3.72854	2.07077	5.35574e-73	1.56334e-70
ENSMUSG00000102037	Bcl2a1a	-3.72425	0.718784	8.79625e-21	6.55564e-19
ENSMUSG00000024338	Psmb8	-3.71026	3.3147	1.53383e-77	4.97472e-75
ENSMUSG00000096727	Psmb9	-3.60358	1.88154	8.9883e-52	1.54334e-49
ENSMUSG00000078853	Igtp	-3.56665	4.35817	6.30424e-192	1.38016e-188
ENSMUSG00000037321	Tap1	-3.55387	3.95267	2.47554e-163	3.61305e-160
ENSMUSG00000025492	Ifitm3	-3.5122	5.27136	9.00458e-195	2.25295e-191
ENSMUSG00000061232	H2-K1	-3.49352	6.38766	6.11689e-142	6.30184e-139
ENSMUSG00000034422	Parp14	-3.46512	3.97271	1.08019e-87	4.02518e-85
ENSMUSG00000033880	Lgals3bp	-3.44624	6.17741	6.14434e-102	3.36288e-99
ENSMUSG00000035208	Slfn8	-3.40625	2.60006	2.20565e-42	2.94883e-40
ENSMUSG00000030921	Trim30a	-3.36596	3.41703	2.00434e-60	4.28097e-58
ENSMUSG00000026548	Slamf9	-3.36471	1.58084	1.22473e-29	1.28442e-27
ENSMUSG00000026104	Stat1	-3.35257	6.54621	3.65626e-125	3.04932e-122
ENSMUSG00000017830	Dhx58	-3.33789	2.22285	7.16331e-37	8.9613e-35
ENSMUSG00000058818	Pirb	-3.33001	0.416256	1.33856e-17	8.14015e-16
ENSMUSG00000028270	Gbp2	-3.32948	3.34201	3.6355e-85	1.3265e-82
ENSMUSG00000097415	AU020206	-3.27812	2.90046	3.58267e-63	8.04448e-61
ENSMUSG00000039236	Isg20	-3.26643	0.91752	1.98556e-26	1.88995e-24
ENSMUSG00000057191	AB124611	-3.26479	0.535479	1.41672e-22	1.15946e-20
ENSMUSG00000040552	C3ar1	-3.26373	2.97958	3.76845e-67	9.42866e-65
ENSMUSG00000073902	Gvin3	-3.2629	0.227997	1.60553e-20	1.17654e-18
ENSMUSG00000046879	Irgm1	-3.26108	4.84561	2.931e-199	8.55559e-196
ENSMUSG00000046245	Pilra	-3.22545	0.0613059	1.75364e-12	7.52774e-11
ENSMUSG00000074207	Adh1	-3.16362	0.499407	3.4751e-25	3.18654e-23
ENSMUSG00000015355	Cd48	-3.1391	0.576169	2.41474e-18	1.51583e-16
ENSMUSG00000022014	Epsti1	-3.1095	2.01756	5.3562e-36	6.42524e-34
ENSMUSG00000072620	Slfn2	-3.10665	2.62558	1.20647e-48	1.88661e-46
ENSMUSG00000016496	Cd274	-3.1052	1.96147	5.79478e-46	8.60083e-44
ENSMUSG00000040296	Rigi	-3.08829	4.01445	1.75701e-84	6.28005e-82
ENSMUSG00000026896	Ifih1	-3.07926	4.23646	3.75583e-90	1.49499e-87
ENSMUSG00000106734	Gm20559	-3.05553	3.1613	1.62072e-55	3.18936e-53
ENSMUSG00000023341	Mx2	-3.02624	2.67641	6.05237e-58	1.2184e-55
ENSMUSG00000026222	Sp100	-3.01835	2.62847	1.03384e-49	1.69221e-47
ENSMUSG00000032596	Uba7	-3.01394	2.77687	1.0643e-49	1.7101e-47
ENSMUSG00000057596	Trim30d	-3.00103	2.33293	1.46927e-42	1.99478e-40
ENSMUSG00000069793	Slfn9	-2.99051	2.01697	2.79866e-38	3.6041e-36
ENSMUSG00000089929	Bcl2a1b	-2.96717	1.77496	6.29603e-24	5.40533e-22
ENSMUSG00000078945	Naip2	-2.94723	1.66626	5.71831e-33	6.50327e-31
ENSMUSG00000070034	Sp110	-2.93022	1.52365	6.53885e-36	7.73793e-34
ENSMUSG00000037731	Themis2	-2.8757	1.86875	9.61098e-22	7.54828e-20
ENSMUSG00000027322	Siglec1	-2.85617	1.99293	2.28619e-27	2.24946e-25
ENSMUSG00000091549	Gm6548	-2.84884	2.49979	5.29431e-57	1.05369e-54
ENSMUSG00000044827	Tlr1	-2.83237	1.29995	3.85208e-21	2.959e-19
ENSMUSG00000049103	Ccr2	-2.8172	0.091659	2.16308e-10	7.39925e-09
ENSMUSG00000040253	Gbp7	-2.81357	4.31797	1.313e-98	6.76351e-96
ENSMUSG00000071713	Csf2rb	-2.79202	1.9394	2.03717e-42	2.74453e-40
ENSMUSG00000105504	Gbp5	-2.75071	2.19274	8.39177e-52	1.45518e-49
ENSMUSG00000030966	Trim21	-2.72988	2.54941	8.92214e-51	1.50252e-48
ENSMUSG00000056144	Trim34a	-2.72959	2.65143	5.7974e-30	6.15368e-28
ENSMUSG00000073411	H2-D1	-2.7138	6.76084	3.26687e-90	1.3306e-87
ENSMUSG00000028459	Cd72	-2.70472	3.23125	1.71921e-25	1.58475e-23
ENSMUSG00000063268	Parp10	-2.67736	2.63563	1.13924e-42	1.57108e-40
ENSMUSG00000010358	Ifi35	-2.67564	2.81535	6.90367e-44	9.99264e-42
ENSMUSG00000067212	H2-T23	-2.65256	3.7032	3.02429e-47	4.56615e-45
ENSMUSG00000029826	Zc3hav1	-2.64947	3.63442	9.70151e-71	2.69702e-68
ENSMUSG00000029298	Gbp9	-2.62577	2.63206	3.16234e-50	5.27478e-48
ENSMUSG00000120992	D17H6S56E-5	-2.62166	3.6386	2.14859e-66	5.15484e-64
ENSMUSG00000024079	Eif2ak2	-2.61171	4.25425	9.01499e-67	2.1929e-64
ENSMUSG00000025017	Pik3ap1	-2.61121	3.85652	5.52918e-62	1.2258e-59
ENSMUSG00000041736	Tspo	-2.59144	2.33194	2.05324e-47	3.12699e-45
ENSMUSG00000021322	Aoah	-2.5847	0.0639342	1.93544e-09	5.97835e-08
ENSMUSG00000035004	Igsf6	-2.56986	0.515618	1.87138e-16	1.0438e-14
ENSMUSG00000073418	C4b	-2.56846	5.71858	4.23973e-90	1.6501e-87
ENSMUSG00000027078	Ube2l6	-2.55895	3.62464	6.20567e-64	1.43008e-61
ENSMUSG00000049037	Clec4a1	-2.53226	1.04887	6.0087e-10	1.94882e-08
ENSMUSG00000049502	Dtx3l	-2.52858	3.49488	1.95608e-51	3.32609e-49
ENSMUSG00000071068	Treml2	-2.52577	1.1831	1.23375e-15	6.56773e-14
ENSMUSG00000045868	Gvin1	-2.50795	3.08417	1.34558e-30	1.44579e-28
ENSMUSG00000045932	Ifit2	-2.50203	5.05776	1.21249e-75	3.79207e-73
ENSMUSG00000022906	Parp9	-2.48588	3.3928	4.74452e-52	8.30955e-50
ENSMUSG00000041481	Serpina3g	-2.48284	0.845156	6.07016e-13	2.7471e-11
ENSMUSG00000078606	Gvin2	-2.47915	2.55438	9.02217e-22	7.11776e-20
ENSMUSG00000037095	Lrg1	-2.47785	1.79758	7.53217e-13	3.37387e-11
ENSMUSG00000027995	Tlr2	-2.47321	1.60808	4.30834e-21	3.29503e-19
ENSMUSG00000002325	Irf9	-2.46399	4.60394	2.33066e-71	6.58373e-69
ENSMUSG00000071715	Ncf4	-2.45164	0.103055	2.94797e-11	1.12977e-09
ENSMUSG00000045322	Tlr9	-2.44586	1.22084	3.27311e-20	2.33029e-18
ENSMUSG00000009585	Apobec3	-2.42942	2.95584	1.57069e-34	1.82179e-32
ENSMUSG00000054435	Gimap4	-2.42842	0.806281	2.46738e-18	1.54334e-16
ENSMUSG00000038507	Parp12	-2.3992	4.12208	7.61926e-80	2.56622e-77
ENSMUSG00000031504	Rab20	-2.39131	0.339807	7.78896e-11	2.82434e-09
ENSMUSG00000003283	Hck	-2.38362	2.56477	2.9376e-23	2.48547e-21
ENSMUSG00000052160	Pld4	-2.37808	4.60516	6.49828e-59	1.33895e-56
ENSMUSG00000026395	Ptprc	-2.3762	3.01794	7.16379e-44	1.02842e-41
ENSMUSG00000050335	Lgals3	-2.37356	0.840243	3.40766e-13	1.56235e-11
ENSMUSG00000069874	Irgm2	-2.36716	3.23999	1.52809e-53	2.78781e-51
ENSMUSG00000024397	Aif1	-2.36024	3.03101	1.29734e-32	1.44724e-30
ENSMUSG00000036594	H2-Aa	-2.35836	1.10411	5.05101e-14	2.49193e-12
ENSMUSG00000093938	Evi2b	-2.32883	0.48399	3.09316e-13	1.42938e-11
ENSMUSG00000026271	Gpr35	-2.32704	0.61361	2.40736e-16	1.33005e-14
ENSMUSG00000025574	Tk1	-2.3198	1.29374	2.39728e-20	1.73496e-18
ENSMUSG00000040613	Apobec1	-2.31973	2.11084	3.08515e-18	1.90258e-16
ENSMUSG00000024737	Slc15a3	-2.30415	2.02085	1.39838e-22	1.14982e-20
ENSMUSG00000070031	Sp140	-2.29762	0.902323	4.78887e-12	1.97347e-10
ENSMUSG00000015947	Fcgr1	-2.29546	3.09716	9.57842e-54	1.76586e-51
ENSMUSG00000000732	Icosl	-2.29483	2.51908	2.57695e-36	3.1126e-34
ENSMUSG00000001123	Lgals9	-2.2831	4.41517	1.83428e-73	5.44501e-71
ENSMUSG00000060802	B2m	-2.28024	7.29705	2.97901e-78	9.84422e-76
ENSMUSG00000040751	Lat2	-2.27498	1.81721	4.27678e-18	2.62819e-16
ENSMUSG00000075602	Ly6a	-2.26449	4.52446	6.55978e-108	4.10314e-105
ENSMUSG00000031838	Ifi30	-2.25919	2.89243	2.09318e-33	2.39608e-31
ENSMUSG00000060519	Tor3a	-2.25653	3.84517	7.54698e-53	1.34875e-50
ENSMUSG00000047180	Neurl3	-2.23092	0.698288	1.72601e-11	6.65844e-10
ENSMUSG00000056116	H2-T22	-2.21947	4.42155	8.23395e-53	1.45666e-50
ENSMUSG00000121501	ENSMUSG00000121501	-2.18615	0.54029	1.0733e-08	2.97904e-07
ENSMUSG00000058163	Gm5431	-2.18023	0.0129177	1.61694e-06	2.97157e-05
ENSMUSG00000030148	Clec4a2	-2.15966	0.926397	7.08153e-16	3.82796e-14
ENSMUSG00000049988	Lrrc25	-2.14053	1.16808	2.00335e-19	1.34432e-17
ENSMUSG00000038642	Ctss	-2.10763	6.49234	2.47215e-90	1.03089e-87
ENSMUSG00000058715	Fcer1g	-2.09756	4.01391	1.23708e-39	1.62904e-37
ENSMUSG00000066258	Trim12a	-2.09007	1.7537	3.12792e-28	3.11263e-26
ENSMUSG00000071714	Csf2rb2	-2.08272	1.51104	6.89196e-20	4.77098e-18
ENSMUSG00000000275	Trim25	-2.08124	3.98566	1.52001e-60	3.28661e-58
ENSMUSG00000071203	Naip5	-2.07621	1.0608	1.49889e-16	8.441e-15
ENSMUSG00000035493	Tgfbi	-2.06486	3.48294	7.21147e-25	6.54413e-23
ENSMUSG00000053835	H2-T24	-2.06396	0.741661	1.63948e-12	7.08985e-11
ENSMUSG00000050370	Ch25h	-2.0539	0.0519406	6.48949e-05	0.000786553
ENSMUSG00000029798	Herc6	-2.04719	3.79879	1.61823e-31	1.77136e-29
ENSMUSG00000021624	Cd180	-2.04538	2.3539	8.63327e-21	6.46167e-19
ENSMUSG00000039304	Tnfsf10	-2.042	1.27377	7.06223e-16	3.82796e-14
ENSMUSG00000026177	Slc11a1	-2.03891	1.87741	1.75057e-20	1.27748e-18
ENSMUSG00000079419	Ms4a6c	-2.03676	1.90513	2.62277e-18	1.62891e-16
ENSMUSG00000073421	H2-Ab1	-2.03578	1.18138	8.05692e-12	3.22904e-10
ENSMUSG00000037661	Gpr160	-2.03552	0.324326	1.571e-10	5.52501e-09
ENSMUSG00000047735	Samd9l	-2.02996	4.36136	1.83155e-55	3.56419e-53
ENSMUSG00000043091	Tuba1c	-2.01365	2.33691	8.49585e-25	7.66992e-23
ENSMUSG00000039997	Ifi203	-2.01014	2.09106	8.4337e-15	4.29383e-13
ENSMUSG00000057143	Trim12c	-1.99986	2.90356	7.69807e-33	8.69832e-31
ENSMUSG00000090164	BC035044	-1.98875	0.792484	9.49187e-13	4.16418e-11
ENSMUSG00000040428	Plekha4	-1.97355	0.941842	9.94961e-17	5.67614e-15
ENSMUSG00000022148	Fyb1	-1.97329	2.45785	9.54507e-21	7.05368e-19
ENSMUSG00000073940	Hbb-bt	-1.97248	2.74452	0.000244554	0.00238481
ENSMUSG00000055172	C1ra	-1.96704	1.76836	8.26183e-17	4.75979e-15
ENSMUSG00000024339	Tap2	-1.96352	3.30734	7.71632e-43	1.07257e-40
ENSMUSG00000063286	Gvin-ps7	-1.95146	1.08161	8.40777e-09	2.38012e-07
ENSMUSG00000031103	Elf4	-1.94236	1.74838	3.5079e-19	2.30968e-17
ENSMUSG00000069893	9930111J21Rik1	-1.93861	0.143611	1.89883e-06	3.432e-05
ENSMUSG00000033450	Tagap	-1.93508	1.53196	6.75812e-20	4.69689e-18
ENSMUSG00000024371	C2	-1.93419	2.07358	9.10446e-21	6.75659e-19
ENSMUSG00000016206	H2-M3	-1.91922	1.58302	4.91397e-15	2.55381e-13
ENSMUSG00000033220	Rac2	-1.90194	2.76436	2.55112e-28	2.55316e-26
ENSMUSG00000031304	Il2rg	-1.89854	2.23939	8.05508e-16	4.31427e-14
ENSMUSG00000026628	Atf3	-1.87447	0.317745	3.15295e-10	1.06743e-08
ENSMUSG00000021423	Ly86	-1.87411	4.30521	1.39278e-69	3.81143e-67
ENSMUSG00000040592	Cd79b	-1.85657	0.0628873	1.54862e-07	3.55054e-06
ENSMUSG00000044811	Cd300c2	-1.84945	1.77101	1.79686e-18	1.14022e-16
ENSMUSG00000040033	Stat2	-1.83752	5.49916	1.31465e-49	2.09316e-47
ENSMUSG00000024677	Ms4a6b	-1.8373	1.69644	2.36041e-12	1.0034e-10
ENSMUSG00000025491	Ifitm1	-1.83343	2.05687	2.01067e-21	1.57209e-19
ENSMUSG00000040345	Arhgap9	-1.80805	0.633716	7.92855e-13	3.54236e-11
ENSMUSG00000024164	C3	-1.80289	0.112838	1.89734e-07	4.29329e-06
ENSMUSG00000002111	Spi1	-1.79603	2.81358	3.79844e-20	2.67172e-18
ENSMUSG00000000290	Itgb2	-1.79592	2.58977	1.29359e-17	7.89405e-16
ENSMUSG00000024300	Myo1f	-1.78537	2.34105	4.29111e-13	1.95207e-11
ENSMUSG00000060586	H2-Eb1	-1.77803	0.770326	4.24178e-08	1.08453e-06
ENSMUSG00000043832	Clec4a3	-1.77523	1.00474	3.69385e-07	7.85123e-06
ENSMUSG00000048779	P2ry6	-1.76219	2.37312	5.89725e-20	4.11492e-18
ENSMUSG00000029814	Igf2bp3	-1.74863	0.221886	8.6633e-09	2.4433e-07
ENSMUSG00000069516	Lyz2	-1.74681	3.3078	6.79968e-38	8.69267e-36
ENSMUSG00000024308	Tapbp	-1.73893	5.33768	6.6397e-65	1.57146e-62
ENSMUSG00000022575	Gsdmd	-1.73869	1.82869	8.6665e-17	4.97656e-15
ENSMUSG00000030111	A2m	-1.73651	3.25631	1.64895e-36	2.01956e-34
ENSMUSG00000019122	Ccl9	-1.73513	2.57908	1.84259e-14	9.24674e-13
ENSMUSG00000021998	Lcp1	-1.73269	4.35868	2.60254e-31	2.83111e-29
ENSMUSG00000026946	Nmi	-1.72506	2.00385	3.92135e-19	2.56263e-17
ENSMUSG00000029204	Rhoh	-1.72278	0.525214	6.71906e-07	1.36201e-05
ENSMUSG00000097572	Gm26797	-1.72156	0.432829	7.58653e-09	2.16402e-07
ENSMUSG00000024679	Ms4a6d	-1.70846	1.5701	6.24035e-16	3.39421e-14
ENSMUSG00000046805	Mpeg1	-1.70662	5.48298	1.70207e-38	2.20815e-36
ENSMUSG00000069919	Hba-a1	-1.68293	4.25461	0.00247121	0.0159943
ENSMUSG00000032089	Il10ra	-1.6716	3.42739	1.76476e-28	1.77632e-26
ENSMUSG00000078486	Perm1	-1.66126	0.867533	6.0443e-13	2.74249e-11
ENSMUSG00000030830	Itgal	-1.66121	1.81501	4.7054e-17	2.7562e-15
ENSMUSG00000078942	Naip6	-1.65587	0.454026	6.43075e-09	1.85244e-07
ENSMUSG00000031165	Was	-1.65269	1.05422	1.44628e-08	3.96404e-07
ENSMUSG00000036905	C1qb	-1.6516	6.18513	2.72683e-68	7.34733e-66
ENSMUSG00000030560	Ctsc	-1.62919	3.9703	1.60598e-38	2.09903e-36
ENSMUSG00000078153	Psme2b	-1.62578	1.21541	1.25286e-11	4.87615e-10
ENSMUSG00000084846	A730011C13Rik	-1.62241	0.312883	3.07171e-09	9.18052e-08
ENSMUSG00000026656	Fcgr2b	-1.61027	2.89564	4.23723e-22	3.41986e-20
ENSMUSG00000021880	Rnase6	-1.59437	0.0500904	2.10178e-06	3.76772e-05
ENSMUSG00000064215	Ifi27	-1.58981	3.89833	7.83517e-46	1.15315e-43
ENSMUSG00000024056	Ndc80	-1.58018	0.506229	2.024e-09	6.22994e-08
ENSMUSG00000106446	Gm42970	-1.57848	0.445748	4.43641e-05	0.000563038
ENSMUSG00000024610	Cd74	-1.57256	2.77065	1.73904e-15	9.20168e-14
ENSMUSG00000052305	Hbb-bs	-1.57095	5.35875	0.00522626	0.0288747
ENSMUSG00000027580	Helz2	-1.56569	2.96395	5.8208e-15	2.98961e-13
ENSMUSG00000037405	Icam1	-1.5559	2.42175	4.9888e-23	4.16066e-21
ENSMUSG00000037418	Best1	-1.55497	0.429761	4.62431e-06	7.72545e-05
ENSMUSG00000020897	Aurkb	-1.55483	0.842963	1.83089e-08	4.93327e-07
ENSMUSG00000036887	C1qa	-1.5542	6.12723	3.67153e-46	5.496e-44
ENSMUSG00000060441	Trim5	-1.55154	0.0763968	9.23854e-08	2.20742e-06
ENSMUSG00000023249	Parp3	-1.54474	2.31244	2.32522e-21	1.80194e-19
ENSMUSG00000000562	Adora3	-1.54155	0.696709	7.70864e-09	2.19448e-07
ENSMUSG00000004266	Ptpn6	-1.53705	2.9978	2.81345e-17	1.66469e-15
ENSMUSG00000020399	Havcr2	-1.53654	1.93193	1.65413e-12	7.13558e-11
ENSMUSG00000020806	Rhbdf2	-1.53139	1.09054	9.63687e-12	3.81856e-10
ENSMUSG00000074252	Gm10654	-1.52957	1.36351	1.11156e-06	2.14404e-05
ENSMUSG00000042228	Lyn	-1.52818	4.13302	3.03869e-32	3.36833e-30
ENSMUSG00000039013	Siglecf	-1.52435	0.0903122	8.51973e-07	1.68986e-05
ENSMUSG00000027315	Spint1	-1.52185	2.13336	1.82097e-19	1.22664e-17
ENSMUSG00000039396	Neil3	-1.51771	0.164241	1.08765e-06	2.10256e-05
ENSMUSG00000022831	Hcls1	-1.51687	3.10896	2.55476e-24	2.22607e-22
ENSMUSG00000079547	H2-DMb1	-1.51573	0.64775	5.12512e-09	1.50103e-07
ENSMUSG00000024349	Sting1	-1.50968	2.55608	2.99186e-19	1.99998e-17
ENSMUSG00000022945	Chaf1b	-1.509	0.453889	9.82394e-08	2.33416e-06
ENSMUSG00000006519	Cyba	-1.50667	2.67072	1.54216e-22	1.25625e-20
ENSMUSG00000024066	Xdh	-1.50646	0.511892	3.8477e-07	8.14856e-06
ENSMUSG00000036896	C1qc	-1.50568	6.13223	4.02846e-55	7.5865e-53
ENSMUSG00000049130	C5ar1	-1.50319	0.392781	1.99598e-06	3.58907e-05
ENSMUSG00000041859	Mcm3	-1.49792	2.52965	6.08316e-22	4.84275e-20
ENSMUSG00000038147	Cd84	-1.49555	2.30356	1.00752e-13	4.78205e-12
ENSMUSG00000034652	Cd300a	-1.49383	0.642981	4.82729e-06	7.9986e-05
ENSMUSG00000069917	Hba-a2	-1.49284	4.30164	0.00674231	0.0352492
ENSMUSG00000090272	Mndal	-1.48735	1.89925	3.193e-12	1.33785e-10
ENSMUSG00000062510	Nsl1	-1.48495	0.394191	3.52278e-07	7.53333e-06
ENSMUSG00000018899	Irf1	-1.48168	2.49195	3.67825e-20	2.60813e-18
ENSMUSG00000036908	Unc93b1	-1.47829	4.42081	6.56028e-37	8.26595e-35
ENSMUSG00000025888	Casp1	-1.47227	1.57485	5.992e-10	1.94701e-08
ENSMUSG00000031170	Slc38a5	-1.46551	2.87289	3.81334e-12	1.58639e-10
ENSMUSG00000001473	Tubb6	-1.46475	2.03344	4.84094e-17	2.82614e-15
ENSMUSG00000051439	Cd14	-1.46033	1.75297	2.20945e-09	6.71811e-08
ENSMUSG00000054404	Slfn5	-1.45838	3.96788	3.64064e-26	3.42807e-24
ENSMUSG00000043008	Klhl6	-1.45035	1.90925	5.22706e-11	1.95196e-09
ENSMUSG00000078349	AW011738	-1.44712	3.22693	1.52268e-26	1.45728e-24
ENSMUSG00000031662	Snx20	-1.43591	0.999426	8.17423e-07	1.63056e-05
ENSMUSG00000027399	Il1a	-1.43562	0.228748	3.47812e-07	7.44692e-06
ENSMUSG00000053158	Fes	-1.43297	2.19705	2.76781e-13	1.28582e-11
ENSMUSG00000063234	Gpr84	-1.42917	0.809931	5.58915e-05	0.000687418
ENSMUSG00000110206	Flt3l	-1.42865	0.104049	6.32323e-06	0.000101788
ENSMUSG00000029771	Irf5	-1.40965	2.38886	1.42697e-14	7.20231e-13
ENSMUSG00000060791	Gmfg	-1.4009	1.26548	4.62575e-09	1.3639e-07
ENSMUSG00000030745	Il21r	-1.39924	1.06212	3.29152e-08	8.54039e-07
ENSMUSG00000026126	Ptpn18	-1.39528	1.00715	5.11551e-07	1.06153e-05
ENSMUSG00000038037	Socs1	-1.3942	0.574884	1.84608e-06	3.35746e-05
ENSMUSG00000020143	Dock2	-1.39195	2.90272	1.47839e-17	8.92845e-16
ENSMUSG00000024989	Cep55	-1.39142	0.393732	9.23173e-06	0.000143337
ENSMUSG00000041515	Irf8	-1.38676	3.04077	2.21214e-18	1.39365e-16
ENSMUSG00000025804	Ccr1	-1.38319	0.526358	3.01765e-08	7.91184e-07
ENSMUSG00000074342	I830077J02Rik	-1.3776	0.86439	3.09676e-07	6.72912e-06
ENSMUSG00000001930	Vwf	-1.37542	5.36155	1.1764e-58	2.39575e-56
ENSMUSG00000031264	Btk	-1.36895	0.638347	4.10847e-07	8.64852e-06
ENSMUSG00000027379	Bub1	-1.36638	0.815075	3.21734e-07	6.9652e-06
ENSMUSG00000031101	Sash3	-1.36346	1.63028	1.71216e-10	5.97345e-09
ENSMUSG00000004730	Adgre1	-1.36289	3.36569	2.53276e-17	1.51395e-15
ENSMUSG00000020407	Upp1	-1.35967	0.0498288	4.94682e-05	0.000620621
ENSMUSG00000034116	Vav1	-1.35699	2.74156	1.87712e-12	8.03813e-11
ENSMUSG00000034786	Gpsm3	-1.35674	1.69919	1.06995e-07	2.51532e-06
ENSMUSG00000039899	Fgl2	-1.35067	2.8738	2.62612e-20	1.89275e-18
ENSMUSG00000031497	Tnfsf13b	-1.34473	0.928427	1.15256e-06	2.21337e-05
ENSMUSG00000026480	Ncf2	-1.34436	2.41267	2.84275e-18	1.75929e-16
ENSMUSG00000002668	Dennd1c	-1.34043	0.495054	8.11209e-06	0.000127307
ENSMUSG00000033777	Tlr13	-1.33694	2.11828	6.38305e-14	3.0882e-12
ENSMUSG00000004952	Rasa4	-1.33571	2.63836	6.0489e-17	3.50796e-15
ENSMUSG00000030793	Pycard	-1.33452	2.27235	2.56895e-16	1.41486e-14
ENSMUSG00000034947	Tmem106a	-1.33291	0.895539	9.153e-08	2.18997e-06
ENSMUSG00000002699	Lcp2	-1.33122	2.82756	3.32674e-12	1.39056e-10
ENSMUSG00000024965	Fermt3	-1.32101	3.00462	9.41166e-19	6.03794e-17
ENSMUSG00000066975	Cryba4	-1.32089	0.171457	1.31554e-05	0.000195588
ENSMUSG00000016256	Ctsz	-1.31486	5.2955	2.21909e-37	2.81631e-35
ENSMUSG00000021200	Asb2	-1.31441	1.8551	1.00851e-07	2.38691e-06
ENSMUSG00000033192	Lpcat2	-1.31395	3.73368	1.17623e-36	1.46102e-34
ENSMUSG00000040204	Pclaf	-1.30883	1.72277	5.20085e-10	1.70257e-08
ENSMUSG00000074874	Ctla2b	-1.30465	0.99551	7.79326e-07	1.56347e-05
ENSMUSG00000048865	Arhgap30	-1.28875	2.58757	1.48104e-10	5.21911e-09
ENSMUSG00000022952	Runx1	-1.28425	1.1717	2.52287e-08	6.67456e-07
ENSMUSG00000028678	Kif2c	-1.283	1.03207	6.56438e-06	0.000105186
ENSMUSG00000115632	Gm17922	-1.28262	0.647505	3.5601e-05	0.000467404
ENSMUSG00000027611	Procr	-1.28204	0.196181	0.000103385	0.00116219
ENSMUSG00000001228	Uhrf1	-1.28196	2.15795	3.56679e-13	1.63104e-11
ENSMUSG00000103047	Gm37310	-1.27645	0.185576	0.000115466	0.00128398
ENSMUSG00000073412	Lst1	-1.2692	1.53383	5.57326e-08	1.37867e-06
ENSMUSG00000048572	Tmem252	-1.26882	2.80295	6.75827e-13	3.04279e-11
ENSMUSG00000061167	Rpl15-ps3	-1.26857	0.759623	0.000134378	0.0014618
ENSMUSG00000056737	Capg	-1.26368	1.66673	2.19594e-07	4.91811e-06
ENSMUSG00000005470	Asf1b	-1.25958	0.711143	1.97812e-07	4.46453e-06
ENSMUSG00000037318	Traf3ip3	-1.25779	0.492065	7.82351e-05	0.0009227
ENSMUSG00000019942	Cdk1	-1.25637	1.74072	8.22338e-11	2.97571e-09
ENSMUSG00000044258	Ctla2a	-1.24796	4.18461	7.86929e-35	9.24985e-33
ENSMUSG00000032322	Pstpip1	-1.24386	1.15714	4.33124e-09	1.27921e-07
ENSMUSG00000028859	Csf3r	-1.22894	2.52535	4.85346e-11	1.82803e-09
ENSMUSG00000069892	9930111J21Rik2	-1.22623	1.81119	4.38774e-08	1.11534e-06
ENSMUSG00000017716	Birc5	-1.22445	1.57757	1.96236e-09	6.05084e-08
ENSMUSG00000064267	Hvcn1	-1.22123	2.61051	1.56819e-12	6.79833e-11
ENSMUSG00000009772	Nuak2	-1.22107	0.847006	3.37413e-07	7.25533e-06
ENSMUSG00000026928	Card9	-1.21852	0.922744	9.40807e-07	1.83898e-05
ENSMUSG00000028599	Tnfrsf1b	-1.21738	2.71378	5.4372e-11	2.02611e-09
ENSMUSG00000007041	Clic1	-1.2162	4.04189	9.81679e-24	8.38689e-22
ENSMUSG00000015950	Ncf1	-1.21393	3.79715	7.36561e-20	5.05887e-18
ENSMUSG00000000958	Slc7a7	-1.21244	1.36541	2.20573e-06	3.93392e-05
ENSMUSG00000052821	Cysltr1	-1.20721	0.26688	6.87275e-05	0.000826145
ENSMUSG00000097705	Gm26740	-1.2061	0.159639	0.000436136	0.00386553
ENSMUSG00000024727	Trpm6	-1.20539	0.38697	9.89435e-06	0.000152662
ENSMUSG00000030579	Tyrobp	-1.20513	3.93726	5.10491e-21	3.87045e-19
ENSMUSG00000037411	Serpine1	-1.19985	1.07055	1.95078e-07	4.4085e-06
ENSMUSG00000098112	Bin2	-1.19867	2.81962	7.17097e-16	3.86438e-14
ENSMUSG00000037544	Dlgap5	-1.19644	0.306698	0.000292814	0.00276759
ENSMUSG00000038235	F11r	-1.19559	3.31027	7.96185e-13	3.54819e-11
ENSMUSG00000032359	Ctsh	-1.19551	4.53251	2.33671e-24	2.05654e-22
ENSMUSG00000051506	Wdfy4	-1.19336	2.42219	7.02656e-08	1.70921e-06
ENSMUSG00000053113	Socs3	-1.1871	2.23883	6.51589e-12	2.66012e-10
ENSMUSG00000001166	Oas1c	-1.18599	0.835207	2.80006e-07	6.11476e-06
ENSMUSG00000022901	Cd86	-1.18589	1.90018	1.59823e-10	5.60951e-09
ENSMUSG00000027306	Nusap1	-1.18556	1.63065	6.26701e-10	2.02137e-08
ENSMUSG00000031803	B3gnt3	-1.18472	0.632599	1.89294e-05	0.000269318
ENSMUSG00000068758	Il3ra	-1.18126	0.271134	8.28458e-05	0.000966663
ENSMUSG00000108920	Gm44678	-1.18062	0.805831	7.09112e-06	0.000112597
ENSMUSG00000030220	Arhgdib	-1.17788	3.83447	1.25531e-24	1.12746e-22
ENSMUSG00000015880	Ncapg	-1.17755	0.67126	1.20087e-06	2.29356e-05
ENSMUSG00000113670	Gm49686	-1.17663	1.1144	6.03433e-07	1.23033e-05
ENSMUSG00000049625	Tifab	-1.17377	2.36289	1.79431e-10	6.22289e-09
ENSMUSG00000030124	Lag3	-1.17324	2.72967	5.9774e-09	1.73038e-07
ENSMUSG00000060591	Ifitm2	-1.16872	3.37412	2.49862e-18	1.55732e-16
ENSMUSG00000018927	Ccl6	-1.16858	1.36198	1.93739e-08	5.18828e-07
ENSMUSG00000038963	Slco4a1	-1.16746	1.19906	1.24093e-05	0.000186395
ENSMUSG00000006585	Cdt1	-1.165	1.47576	3.34578e-07	7.21637e-06
ENSMUSG00000036928	Stag3	-1.16278	1.41409	7.5031e-09	2.14371e-07
ENSMUSG00000024696	Lpxn	-1.16008	0.760383	7.84043e-07	1.57114e-05
ENSMUSG00000030681	Mvp	-1.1479	2.66102	6.36625e-14	3.0882e-12
ENSMUSG00000026873	Phf19	-1.14321	0.521989	0.000115075	0.00128045
ENSMUSG00000043279	Trim56	-1.14124	3.73954	4.05808e-19	2.64212e-17
ENSMUSG00000105703	Gm43305	-1.14106	0.597421	0.00210663	0.0140608
ENSMUSG00000031490	Eif4ebp1	-1.135	1.53134	2.66289e-07	5.84434e-06
ENSMUSG00000055541	Lair1	-1.13361	3.71892	3.46114e-14	1.71239e-12
ENSMUSG00000038521	C1s1	-1.1333	1.10571	5.8059e-07	1.18652e-05
ENSMUSG00000042812	Foxf1	-1.13002	0.171794	0.00101214	0.00777018
ENSMUSG00000026355	Mcm6	-1.12936	3.86248	4.43651e-23	3.71775e-21
ENSMUSG00000037860	Aim2	-1.12618	2.08473	6.41518e-10	2.06157e-08
ENSMUSG00000045930	Clec14a	-1.12562	3.27605	1.67206e-16	9.35608e-15
ENSMUSG00000116305	Lncppara	-1.12073	1.66412	1.24418e-06	2.36597e-05
ENSMUSG00000038811	Gngt2	-1.11848	0.956732	1.99192e-05	0.000281569
ENSMUSG00000026547	Tagln2	-1.11827	3.71446	9.63489e-21	7.09014e-19
ENSMUSG00000056529	Ptafr	-1.11703	0.919139	2.92742e-06	5.07631e-05
ENSMUSG00000044468	Tent5c	-1.11548	1.33794	0.00151746	0.0107904
ENSMUSG00000097585	E230029C05Rik	-1.11286	1.20405	5.71125e-06	9.29617e-05
ENSMUSG00000022622	Acr	-1.10927	0.0979448	0.00131537	0.00960292
ENSMUSG00000031004	Mki67	-1.1092	3.81575	1.04074e-11	4.09605e-10
ENSMUSG00000027368	Dusp2	-1.10765	0.91496	0.000599321	0.00500072
ENSMUSG00000022996	Wnt10b	-1.10569	0.119024	0.00459462	0.0259665
ENSMUSG00000036986	Pml	-1.10139	3.87422	2.69751e-17	1.6015e-15
ENSMUSG00000024691	Fam111a	-1.09799	2.26355	3.74949e-08	9.65714e-07
ENSMUSG00000030786	Itgam	-1.09709	4.83217	1.3131e-25	1.21681e-23
ENSMUSG00000068335	Dok1	-1.09445	0.840157	1.63061e-05	0.000235437
ENSMUSG00000079197	Psme2	-1.09286	4.11421	1.79866e-24	1.59907e-22
ENSMUSG00000001750	Tcirg1	-1.08736	3.9696	1.23945e-16	7.02516e-15
ENSMUSG00000001403	Ube2c	-1.08672	1.43505	1.07376e-06	2.07799e-05
ENSMUSG00000006411	Nectin4	-1.08331	1.44854	2.64131e-05	0.000358327
ENSMUSG00000032218	Ccnb2	-1.08293	1.19171	1.01322e-05	0.000155663
ENSMUSG00000027331	Knstrn	-1.08277	1.64822	7.4595e-06	0.000118018
ENSMUSG00000121050	Gm57047	-1.08076	0.265584	6.81882e-05	0.000820789
ENSMUSG00000028480	Glipr2	-1.07753	2.02972	3.6407e-08	9.39075e-07
ENSMUSG00000063838	Cdc42ep5	-1.07449	0.0568889	0.00127664	0.00938276
ENSMUSG00000030798	Cd37	-1.0677	2.7035	4.70203e-08	1.18151e-06
ENSMUSG00000034708	Grn	-1.06738	6.42461	6.76699e-27	6.58428e-25
ENSMUSG00000018654	Ikzf1	-1.06687	2.7278	9.26292e-13	4.07615e-11
ENSMUSG00000036768	Kif15	-1.0621	1.05918	1.01803e-05	0.000156128
ENSMUSG00000005107	Slc2a9	-1.06111	0.4765	0.000859148	0.00677188
ENSMUSG00000032344	Cgas	-1.06004	0.866261	5.97225e-05	0.000730943
ENSMUSG00000034330	Plcg2	-1.05547	2.76998	3.15908e-08	8.23336e-07
ENSMUSG00000090019	Gimap1	-1.05457	0.441509	2.57817e-05	0.000351394
ENSMUSG00000037820	Tgm2	-1.05422	3.97065	3.48307e-19	2.30198e-17
ENSMUSG00000072844	G530011O06Rikx	-1.05306	1.83963	0.000607707	0.00505143
ENSMUSG00000034792	Gna15	-1.05162	0.914099	6.53742e-05	0.000790216
ENSMUSG00000027326	Knl1	-1.0481	0.522112	0.0030368	0.0188082
ENSMUSG00000005553	Atp4a	-1.04689	0.24654	0.00038659	0.00348298
ENSMUSG00000044424	Gm9493	-1.0398	0.48625	9.61864e-05	0.00109604
ENSMUSG00000018008	Cyth4	-1.03411	4.01625	8.42663e-23	6.96151e-21
ENSMUSG00000046410	Kcnk6	-1.03243	3.05994	9.15489e-12	3.6358e-10
ENSMUSG00000031207	Msn	-1.03042	5.48939	1.72649e-18	1.09955e-16
ENSMUSG00000047810	Ccdc88b	-1.02963	1.99013	1.17834e-07	2.75166e-06
ENSMUSG00000074934	Grem1	-1.02859	1.92694	1.78946e-08	4.84399e-07
ENSMUSG00000010142	Tnfrsf13b	-1.0254	1.37587	2.56869e-07	5.666e-06
ENSMUSG00000043366	Or51e2	-1.02459	0.285169	0.00086454	0.0068052
ENSMUSG00000031639	Tlr3	-1.02323	3.74754	3.67279e-21	2.83371e-19
ENSMUSG00000013707	Tnfaip8l2	-1.02228	1.67761	2.62097e-07	5.75955e-06
ENSMUSG00000032436	Cmtm7	-1.01877	1.71596	3.68391e-09	1.09542e-07
ENSMUSG00000020120	Plek	-1.01711	3.93582	7.01366e-25	6.39777e-23
ENSMUSG00000027074	Slc43a3	-1.01619	1.17381	7.47888e-07	1.50558e-05
ENSMUSG00000024521	Pmaip1	-1.01532	1.39312	2.71391e-07	5.94143e-06
ENSMUSG00000003779	Kif20a	-1.01431	1.61596	2.22779e-06	3.96923e-05
ENSMUSG00000022216	Psme1	-1.01403	5.52021	1.31357e-28	1.32982e-26
ENSMUSG00000027639	Samhd1	-1.01389	4.41494	4.54018e-19	2.94506e-17
ENSMUSG00000059498	Fcgr3	-1.01283	4.03299	2.11381e-22	1.71395e-20
ENSMUSG00000021583	Erap1	-1.01135	3.91477	2.13204e-16	1.18541e-14
ENSMUSG00000028971	Cort	-1.00949	3.92115	1.17953e-15	6.29828e-14
ENSMUSG00000026669	Mcm10	-1.00749	0.945339	4.24376e-05	0.00054371
ENSMUSG00000028581	Laptm5	-1.00724	5.48367	5.73269e-22	4.58458e-20
ENSMUSG00000074715	Ccl28	-1.00627	1.56056	0.00420188	0.0242557
ENSMUSG00000051378	Kif18b	-1.0053	0.645105	0.00132827	0.00967946
ENSMUSG00000113948	Rpl17-ps3	-1.0005	1.19572	0.00017635	0.0018358
ENSMUSG00000020914	Top2a	-0.998712	3.48343	3.15707e-10	1.06743e-08
ENSMUSG00000037686	Aspg	-0.998021	1.35816	2.10893e-06	3.77667e-05
ENSMUSG00000107021	Gm42853	-0.995125	0.458505	0.000291878	0.00276321
ENSMUSG00000036875	Dna2	-0.991237	1.54431	0.000130507	0.00142589
ENSMUSG00000024235	Map3k8	-0.990021	1.07713	4.4362e-05	0.000563038
ENSMUSG00000052142	Rasal3	-0.980844	1.86584	4.71598e-06	7.85628e-05
ENSMUSG00000096753	Fam181a	-0.976787	1.12753	0.000376553	0.00340648
ENSMUSG00000001029	Icam2	-0.976445	1.6724	5.36302e-05	0.000662865
ENSMUSG00000006281	Tep1	-0.97496	2.13054	3.73299e-07	7.92479e-06
ENSMUSG00000001020	S100a4	-0.973944	0.797412	0.00227711	0.0149986
ENSMUSG00000044350	Lacc1	-0.973572	2.64998	8.66565e-11	3.12928e-09
ENSMUSG00000060063	Alox5ap	-0.970822	1.99458	1.4091e-05	0.000208086
ENSMUSG00000024795	Kif20b	-0.970773	0.857745	5.66954e-05	0.00069584
ENSMUSG00000028718	Stil	-0.967116	0.421493	0.0001584	0.00167829
ENSMUSG00000025877	Hk3	-0.967041	1.11188	2.62253e-05	0.000356055
ENSMUSG00000049734	Trex1	-0.966959	3.24591	2.29692e-14	1.1461e-12
ENSMUSG00000106037	Gm4332	-0.963895	0.766512	0.000356987	0.0032547
ENSMUSG00000109505	Gm44677	-0.962848	1.11948	0.000360594	0.00327435
ENSMUSG00000045751	Mms22l	-0.962365	0.542568	0.000223811	0.00223097
ENSMUSG00000054626	Xlr	-0.958463	0.72605	0.000606025	0.00504225
ENSMUSG00000027454	Gins1	-0.957783	0.111125	0.00169613	0.0117881
ENSMUSG00000009687	Fxyd5	-0.952016	3.90063	1.45774e-18	9.31784e-17
ENSMUSG00000079110	Capn3	-0.94677	2.8721	7.38362e-09	2.11302e-07
ENSMUSG00000024013	Fgd2	-0.946621	3.05703	4.9813e-11	1.87216e-09
ENSMUSG00000034311	Kif4	-0.946236	1.65524	5.3927e-06	8.83515e-05
ENSMUSG00000032577	Mapkapk3	-0.946204	1.22034	0.000227426	0.00225924
ENSMUSG00000027907	S100a11	-0.944625	2.8061	3.61019e-11	1.37454e-09
ENSMUSG00000031387	Renbp	-0.940914	1.49828	2.7788e-05	0.000374945
ENSMUSG00000050721	Plekho2	-0.939792	3.45393	1.1668e-11	4.57165e-10
ENSMUSG00000031297	Slc7a3	-0.936163	3.42296	0.000137318	0.001491
ENSMUSG00000052085	Dock8	-0.932872	2.42398	7.9e-07	1.57946e-05
ENSMUSG00000054717	Hmgb2	-0.930436	4.09839	7.28133e-11	2.67348e-09
ENSMUSG00000035697	Arhgap45	-0.927422	3.28835	1.92109e-12	8.20632e-11
ENSMUSG00000028494	Plin2	-0.927092	2.94732	7.1215e-14	3.42654e-12
ENSMUSG00000047407	Tgif1	-0.926473	0.662802	0.00133364	0.00970343
ENSMUSG00000020077	Srgn	-0.922682	3.11676	1.43576e-10	5.07997e-09
ENSMUSG00000093985	Gm10406	-0.922362	0.66887	0.00100818	0.00774779
ENSMUSG00000059555	Tor4a	-0.920755	1.74497	4.8061e-06	7.97102e-05
ENSMUSG00000022146	Osmr	-0.917831	3.08185	1.02859e-10	3.68398e-09
ENSMUSG00000058290	Espl1	-0.914203	1.37286	0.000422805	0.00376549
ENSMUSG00000022034	Esco2	-0.913945	0.0992125	0.0051317	0.0284683
ENSMUSG00000026196	Bard1	-0.912125	0.387855	0.000341735	0.00314181
ENSMUSG00000041849	Card6	-0.911577	1.75714	9.31373e-05	0.00106779
ENSMUSG00000028068	Iqgap3	-0.911546	1.36016	2.29471e-05	0.000319218
ENSMUSG00000044006	Cilp2	-0.909707	2.11367	9.87638e-07	1.91768e-05
ENSMUSG00000022439	Parvg	-0.909641	2.90654	7.74998e-12	3.1203e-10
ENSMUSG00000034906	Ncaph	-0.909397	2.09099	6.71198e-07	1.36201e-05
ENSMUSG00000021485	Mxd3	-0.904843	0.319221	0.0018851	0.0128116
ENSMUSG00000036181	H1f2	-0.904813	3.82253	4.56567e-12	1.89486e-10
ENSMUSG00000003541	Ier3	-0.904704	2.37885	1.46606e-05	0.000215226
ENSMUSG00000021569	Trip13	-0.903523	0.19583	0.00700334	0.0362889
ENSMUSG00000035683	Melk	-0.902866	0.911116	5.83926e-05	0.000716168
ENSMUSG00000021091	Serpina3n	-0.90185	4.02354	5.7321e-16	3.12747e-14
ENSMUSG00000022033	Pbk	-0.899543	1.61925	5.09052e-05	0.00063501
ENSMUSG00000025887	Casp12	-0.898603	0.278369	0.00146161	0.0104613
ENSMUSG00000024659	Anxa1	-0.896224	1.87822	6.27188e-05	0.000761759
ENSMUSG00000079227	Ccr5	-0.896045	3.11108	7.59906e-11	2.76694e-09
ENSMUSG00000087412	Gm15501	-0.894527	1.05562	2.333e-05	0.00032364
ENSMUSG00000030748	Il4ra	-0.894274	3.17746	1.54969e-09	4.82083e-08
ENSMUSG00000025747	Tyms	-0.893392	1.22702	7.84875e-05	0.000924431
ENSMUSG00000040212	Emp3	-0.893093	1.14996	0.00130498	0.00954296
ENSMUSG00000025001	Hells	-0.893018	1.63569	4.75337e-06	7.89105e-05
ENSMUSG00000017756	Slc12a7	-0.890802	2.97098	1.20606e-10	4.29329e-09
ENSMUSG00000027496	Aurka	-0.890349	1.10166	2.25882e-05	0.000314976
ENSMUSG00000118866	Rn7s1	-0.889626	0.980144	0.00239988	0.0156484
ENSMUSG00000118841	Rn7s2	-0.889626	0.980144	0.00240191	0.0156558
ENSMUSG00000002870	Mcm2	-0.889057	2.74201	6.6115e-11	2.44807e-09
ENSMUSG00000076617	Ighm	-0.884344	3.84615	2.15315e-06	3.85192e-05
ENSMUSG00000025076	Casp7	-0.882859	2.96121	5.16093e-11	1.93138e-09
ENSMUSG00000026979	Psd4	-0.882811	1.08663	0.000463313	0.00407148
ENSMUSG00000039005	Tlr4	-0.876575	0.786842	0.000155607	0.00165773
ENSMUSG00000039377	Hlx	-0.874949	0.296167	0.00150858	0.0107403
ENSMUSG00000003812	Dnase2a	-0.874688	1.83178	9.15787e-07	1.80012e-05
ENSMUSG00000048277	Syngr2	-0.874666	3.55806	2.16903e-09	6.61819e-08
ENSMUSG00000028044	Cks1b	-0.870301	1.73938	3.19751e-06	5.5011e-05
ENSMUSG00000031897	Psmb10	-0.869583	4.77912	7.47975e-16	4.01842e-14
ENSMUSG00000050732	Vamp8	-0.867837	2.88997	1.88475e-10	6.51075e-09
ENSMUSG00000030341	Tnfrsf1a	-0.866942	3.57336	5.94242e-14	2.89904e-12
ENSMUSG00000025647	Shisa5	-0.866406	6.23698	1.14588e-25	1.0675e-23
ENSMUSG00000020808	Pimreg	-0.864937	0.887922	0.000414617	0.00370399
ENSMUSG00000002983	Relb	-0.864629	2.31482	9.43483e-07	1.84216e-05
ENSMUSG00000027435	Cd93	-0.857169	4.47444	1.044e-09	3.30646e-08
ENSMUSG00000003617	Cp	-0.856688	4.33429	6.32026e-11	2.34519e-09
ENSMUSG00000039748	Exo1	-0.85655	0.41593	0.000934292	0.007279
ENSMUSG00000030867	Plk1	-0.855496	1.30744	0.000709234	0.00574007
ENSMUSG00000032372	Plscr2	-0.853426	0.735686	0.0014636	0.0104669
ENSMUSG00000024177	Nme4	-0.852805	0.283788	0.0011473	0.00860184
ENSMUSG00000066315	Gm12918	-0.851213	0.575718	0.00435416	0.0248724
ENSMUSG00000004609	Cd33	-0.841805	3.37324	6.21029e-09	1.79484e-07
ENSMUSG00000018819	Lsp1	-0.840821	2.71577	0.000343182	0.00315015
ENSMUSG00000097891	Gm3650	-0.840076	1.14426	0.000622445	0.00515437
ENSMUSG00000045328	Cenpe	-0.836618	2.22717	3.48855e-05	0.000458697
ENSMUSG00000040174	Alkbh3	-0.83632	2.50882	5.53702e-06	9.04621e-05
ENSMUSG00000028066	Pmf1	-0.832696	2.38185	8.04643e-08	1.94648e-06
ENSMUSG00000025225	Nfkb2	-0.832669	2.07092	5.16059e-05	0.000642835
ENSMUSG00000062939	Stat4	-0.831362	0.72171	0.000414787	0.00370399
ENSMUSG00000044177	Wfikkn2	-0.83074	2.11838	0.00613348	0.0327507
ENSMUSG00000023908	Pkmyt1	-0.830559	1.79864	3.0246e-05	0.000403756
ENSMUSG00000007080	Pole	-0.830425	1.60815	3.80986e-05	0.000495366
ENSMUSG00000054520	Sh3bp2	-0.830102	2.52245	1.71201e-07	3.90419e-06
ENSMUSG00000031659	Adcy7	-0.829907	3.28845	4.73194e-09	1.39286e-07
ENSMUSG00000046223	Plaur	-0.82966	0.459464	0.00191526	0.0129813
ENSMUSG00000020216	Jsrp1	-0.82954	0.881957	0.00149535	0.0106629
ENSMUSG00000032128	Robo3	-0.826905	5.24031	3.20805e-19	2.13634e-17
ENSMUSG00000070427	Il18bp	-0.825712	2.57234	3.58925e-07	7.63817e-06
ENSMUSG00000000409	Lck	-0.824786	1.56999	2.13136e-05	0.000299108
ENSMUSG00000003206	Ebi3	-0.824369	1.12543	0.0005854	0.0049056
ENSMUSG00000000628	Hk2	-0.82162	2.83306	1.66958e-06	3.05868e-05
ENSMUSG00000030263	Irag2	-0.82135	0.860011	0.00719479	0.0370507
ENSMUSG00000026088	Mitd1	-0.820594	2.56245	1.0606e-05	0.000161806
ENSMUSG00000023505	Cdca3	-0.820126	1.46854	0.000358566	0.00326399
ENSMUSG00000053063	Clec12a	-0.817068	0.210046	0.00676926	0.0353163
ENSMUSG00000034706	Dnai2	-0.816806	0.79587	0.00162817	0.0114108
ENSMUSG00000039158	Akna	-0.815516	2.55934	6.80396e-08	1.66199e-06
ENSMUSG00000117975	Itprip	-0.813722	0.843593	0.000486611	0.00424427
ENSMUSG00000028970	Abcb1b	-0.813185	1.13937	0.000219336	0.00219386
ENSMUSG00000008496	Pou2f2	-0.813159	3.90109	2.62276e-12	1.10687e-10
ENSMUSG00000023992	Trem2	-0.812938	3.47838	6.26001e-10	2.02137e-08
ENSMUSG00000057137	Tmem140	-0.809884	1.39214	0.00081228	0.00645255
ENSMUSG00000041143	Tmco4	-0.807992	1.19938	0.000143803	0.00155275
ENSMUSG00000040747	Cd53	-0.807096	3.34455	3.81062e-10	1.2664e-08
ENSMUSG00000095115	Itpripl2	-0.806258	3.35571	5.87822e-08	1.45002e-06
ENSMUSG00000008540	Mgst1	-0.805324	2.70342	2.34092e-05	0.000324358
ENSMUSG00000042607	Asb4	-0.803875	1.22136	0.00964809	0.0466596
ENSMUSG00000027641	Rbl1	-0.800142	1.61073	0.000108768	0.00121412
ENSMUSG00000032548	Slco2a1	-0.7986	2.42268	8.49102e-07	1.68607e-05
ENSMUSG00000037872	Ackr1	-0.797437	6.13369	1.74618e-14	8.78808e-13
ENSMUSG00000040715	Rsc1a1	-0.797415	1.99339	0.000121167	0.00133635
ENSMUSG00000028413	B4galt1	-0.78913	3.32363	7.28629e-12	2.95398e-10
ENSMUSG00000040061	Plcb2	-0.788965	1.60769	0.000201524	0.00204795
ENSMUSG00000028159	Dapp1	-0.788019	2.5362	7.67474e-05	0.000906987
ENSMUSG00000033967	Rnf225	-0.787049	0.0632127	0.00930045	0.0454293
ENSMUSG00000029026	Trp73	-0.786898	0.710425	0.00459853	0.0259802
ENSMUSG00000005410	Mcm5	-0.785856	2.88937	1.0335e-07	2.43944e-06
ENSMUSG00000030157	Clec2d	-0.785095	2.41223	0.00100051	0.00770917
ENSMUSG00000064262	Gimap8	-0.784296	0.833858	0.00244808	0.0158739
ENSMUSG00000048327	Ckap2l	-0.782096	1.80263	9.902e-06	0.000152662
ENSMUSG00000026029	Casp8	-0.781956	2.05564	9.16812e-05	0.0010543
ENSMUSG00000020932	Gfap	-0.781931	8.27247	1.2637e-32	1.41874e-30
ENSMUSG00000102997	Gm17244	-0.779844	1.14709	0.000412046	0.00368569
ENSMUSG00000052759	Gpr25	-0.778737	0.763693	0.00195423	0.0132199
ENSMUSG00000038007	Acer2	-0.777253	2.6	0.000191661	0.00197085
ENSMUSG00000031167	Rbm3	-0.776289	7.50807	7.57765e-12	3.06501e-10
ENSMUSG00000084241	Gm13416	-0.770822	0.365885	0.00750176	0.0381825
ENSMUSG00000059791	Nrm	-0.76933	2.02505	1.50976e-05	0.000220902
ENSMUSG00000030474	Siglece	-0.769309	0.125947	0.0101834	0.0486768
ENSMUSG00000038943	Prc1	-0.769232	2.30623	1.57297e-05	0.000228813
ENSMUSG00000041431	Ccnb1	-0.767098	1.46378	0.000148749	0.00159534
ENSMUSG00000028873	Cdca8	-0.765518	1.73533	0.000230419	0.00228385
ENSMUSG00000029915	Clec5a	-0.763014	0.726768	0.00263569	0.0168411
ENSMUSG00000074476	Spc24	-0.761974	0.520927	0.00450062	0.0255227
ENSMUSG00000073599	Ecscr	-0.759013	2.32006	1.67481e-06	3.06507e-05
ENSMUSG00000002227	Mov10	-0.758435	3.38428	4.14183e-07	8.70828e-06
ENSMUSG00000028378	Ptgr1	-0.757955	0.639306	0.00133665	0.00971773
ENSMUSG00000061119	Prcp	-0.756841	3.49762	5.81597e-10	1.89685e-08
ENSMUSG00000036459	Wtip	-0.756541	2.43655	1.33143e-05	0.000197449
ENSMUSG00000074673	Ttll9	-0.755995	0.277677	0.0102779	0.0490084
ENSMUSG00000000301	Pemt	-0.754725	0.703002	0.00455799	0.0257844
ENSMUSG00000044338	Aplnr	-0.752661	2.75916	0.00141573	0.0102037
ENSMUSG00000020812	Snhg16	-0.752374	1.86134	5.42448e-05	0.000668573
ENSMUSG00000017737	Mmp9	-0.750548	0.872626	0.00228043	0.0150118
ENSMUSG00000027715	Ccna2	-0.750287	2.97336	2.08494e-07	4.6875e-06
ENSMUSG00000062175	Tgif2	-0.749783	0.986341	0.00203497	0.0136658
ENSMUSG00000058443	Rpl10-ps3	-0.74971	1.59909	8.57769e-05	0.000992926
ENSMUSG00000001517	Foxm1	-0.749544	2.19168	1.73791e-05	0.000249081
ENSMUSG00000026072	Il1r1	-0.748937	3.1189	2.05357e-09	6.29497e-08
ENSMUSG00000063652	Slc22a21	-0.743892	1.12677	0.00259519	0.0166126
ENSMUSG00000019832	Rab32	-0.739191	1.60853	0.000205669	0.00207733
ENSMUSG00000044583	Tlr7	-0.738432	2.35641	0.000242117	0.00236499
ENSMUSG00000015133	Lrrk1	-0.738043	2.81544	7.88668e-06	0.000124104
ENSMUSG00000005413	Hmox1	-0.735056	2.33903	4.92765e-05	0.000619103
ENSMUSG00000027293	Ehd4	-0.732873	4.01938	3.0267e-12	1.27427e-10
ENSMUSG00000020493	Prr11	-0.724695	0.897545	0.00212908	0.0141749
ENSMUSG00000039187	Fanci	-0.724684	0.223231	0.0100888	0.0483304
ENSMUSG00000079165	Sap25	-0.723314	0.870716	0.00565958	0.0307617
ENSMUSG00000056501	Cebpb	-0.722154	3.10515	5.00654e-08	1.24907e-06
ENSMUSG00000041840	Haus1	-0.719269	1.91243	2.442e-05	0.000336235
ENSMUSG00000002944	Cd36	-0.718534	1.003	0.00290434	0.0181992
ENSMUSG00000030431	Tmem238	-0.718118	1.19205	0.00299587	0.0186592
ENSMUSG00000115338	Pnp	-0.716268	3.66138	9.67896e-12	3.82658e-10
ENSMUSG00000101438	Gm19412	-0.716111	1.28886	0.0030647	0.0189286
ENSMUSG00000038213	Tapbpl	-0.7155	2.36955	1.97007e-05	0.000278931
ENSMUSG00000058586	Serhl	-0.712514	2.13752	1.17461e-05	0.000176889
ENSMUSG00000059883	Irak4	-0.711186	0.87736	0.00638769	0.0337494
ENSMUSG00000018774	Cd68	-0.710141	3.35185	5.19701e-08	1.2929e-06
ENSMUSG00000018381	Abi3	-0.710021	2.52006	2.4761e-05	0.000340129
ENSMUSG00000094840	Muc3a	-0.70961	2.59989	6.97725e-06	0.00011099
ENSMUSG00000031821	Gins2	-0.709495	1.40252	0.00308473	0.0190232
ENSMUSG00000050737	Ptges	-0.708594	2.24726	0.000118324	0.00130828
ENSMUSG00000041779	Tram2	-0.708456	1.45092	0.00135203	0.00980517
ENSMUSG00000032440	Tgfbr2	-0.708085	4.55298	8.81456e-13	3.89844e-11
ENSMUSG00000021190	Lgmn	-0.707393	7.28667	8.59511e-31	9.29227e-29
ENSMUSG00000039873	Neurl2	-0.707139	0.694208	0.00335188	0.0202991
ENSMUSG00000037020	Wdr62	-0.706281	0.76549	0.00229598	0.0150807
ENSMUSG00000040084	Bub1b	-0.705429	2.10437	0.000139887	0.00151514
ENSMUSG00000066894	Vsig10	-0.702226	1.0979	0.00132862	0.00967946
ENSMUSG00000030208	Emp1	-0.702053	2.28743	1.69784e-05	0.000244539
ENSMUSG00000034041	Lyl1	-0.702035	1.98754	1.13445e-05	0.000171579
ENSMUSG00000023206	Il15ra	-0.698765	0.98101	0.00396734	0.0232466
ENSMUSG00000027469	Tpx2	-0.697663	2.65942	5.66704e-06	9.23279e-05
ENSMUSG00000063605	Ccdc102a	-0.695535	1.33002	0.000452291	0.00398864
ENSMUSG00000030403	Vasp	-0.695187	3.71408	3.93343e-06	6.68186e-05
ENSMUSG00000020638	Cmpk2	-0.69502	5.22636	7.74808e-11	2.81535e-09
ENSMUSG00000008398	Elk3	-0.694836	3.45211	2.60066e-07	5.72239e-06
ENSMUSG00000003644	Rps6ka1	-0.693326	3.83819	2.20171e-09	6.70621e-08
ENSMUSG00000031146	Plp2	-0.691598	2.74817	3.71464e-05	0.000484495
ENSMUSG00000021665	Hexb	-0.690667	6.55176	8.77299e-18	5.37239e-16
ENSMUSG00000027323	Rad51	-0.688842	1.22227	0.000675564	0.00551857
ENSMUSG00000025366	Esyt1	-0.688015	3.3527	4.74654e-09	1.39481e-07
ENSMUSG00000022488	Nckap1l	-0.687775	4.19843	6.14772e-10	1.99022e-08
ENSMUSG00000108601	Gm44645	-0.68655	2.62097	1.52821e-06	2.8263e-05
ENSMUSG00000037337	Map4k1	-0.686033	1.15421	0.00289063	0.0181349
ENSMUSG00000092274	Neat1	-0.684587	4.52711	3.98517e-09	1.18098e-07
ENSMUSG00000023367	Tmem176a	-0.684426	3.47126	9.83562e-08	2.33416e-06
ENSMUSG00000009566	Fpgs	-0.683927	2.66294	1.11128e-06	2.14404e-05
ENSMUSG00000071553	Cpa2	-0.682755	0.657143	0.00409118	0.0237624
ENSMUSG00000003824	Syce2	-0.681539	1.56277	0.000331189	0.0030674
ENSMUSG00000020573	Pik3cg	-0.68119	2.31319	1.23626e-05	0.000185852
ENSMUSG00000056394	Lig1	-0.681011	3.51897	9.30654e-09	2.6121e-07
ENSMUSG00000033685	Ucp2	-0.679548	5.10154	5.434e-15	2.79915e-13
ENSMUSG00000033016	Nfatc1	-0.679012	2.53488	9.04318e-06	0.000140534
ENSMUSG00000059336	Slc14a1	-0.677928	3.78066	1.11664e-10	3.98305e-09
ENSMUSG00000032487	Ptgs2	-0.67656	3.13599	9.65164e-07	1.87821e-05
ENSMUSG00000027318	Adam33	-0.676492	0.616078	0.0073059	0.0374796
ENSMUSG00000073771	Btbd19	-0.676193	0.676046	0.0055286	0.0301927
ENSMUSG00000037313	Tacc3	-0.675583	2.98014	1.28996e-05	0.000192439
ENSMUSG00000022177	Haus4	-0.672977	1.34623	0.00835491	0.0417483
ENSMUSG00000021278	Amn	-0.672645	2.65659	3.36974e-05	0.00044441
ENSMUSG00000040312	Cchcr1	-0.6718	1.15984	0.00558592	0.0304203
ENSMUSG00000054412	Gm4793	-0.671309	0.586853	0.00770011	0.0390332
ENSMUSG00000006395	Hyi	-0.671186	1.74095	0.000697108	0.00567067
ENSMUSG00000109122	A230103L15Rik	-0.670889	2.8166	0.000148201	0.00159044
ENSMUSG00000029925	Tbxas1	-0.669275	1.24255	0.0040309	0.0235167
ENSMUSG00000074578	Zfas1	-0.667786	3.99186	3.97583e-08	1.02101e-06
ENSMUSG00000002603	Tgfb1	-0.667586	2.79321	1.17316e-05	0.000176822
ENSMUSG00000024663	Rab3il1	-0.667192	3.75874	1.54336e-08	4.21033e-07
ENSMUSG00000002257	Def6	-0.666921	1.80643	0.00061296	0.0050827
ENSMUSG00000049577	Zfpm1	-0.66583	4.49176	3.66517e-15	1.91047e-13
ENSMUSG00000064090	Vrk2	-0.664744	0.860896	0.00212939	0.0141749
ENSMUSG00000005667	Mthfd2	-0.663818	2.85499	0.00105583	0.0080225
ENSMUSG00000036249	Rbm43	-0.660025	4.07169	3.39728e-08	8.80177e-07
ENSMUSG00000120196	Gm57367	-0.659902	0.953199	0.00936091	0.045655
ENSMUSG00000047676	Rpsa-ps10	-0.65928	1.5212	0.00228641	0.0150429
ENSMUSG00000033386	Frrs1	-0.658211	1.56234	0.00125702	0.00928138
ENSMUSG00000026227	2810459M11Rik	-0.657427	3.12694	5.35424e-06	8.78036e-05
ENSMUSG00000029919	Hpgds	-0.657019	2.6731	4.61886e-06	7.72545e-05
ENSMUSG00000035356	Nfkbiz	-0.654974	2.95023	8.593e-06	0.000134014
ENSMUSG00000040938	Slc16a11	-0.653337	3.26523	1.11884e-06	2.1557e-05
ENSMUSG00000099966	2810402E24Rik	-0.652156	1.58255	0.0016314	0.0114198
ENSMUSG00000030677	Kif22	-0.651064	1.43476	0.000538943	0.00458206
ENSMUSG00000045377	Tmem88	-0.650832	1.08744	0.0022414	0.0148135
ENSMUSG00000033970	Rfc3	-0.650434	2.01955	0.000157411	0.00166983
ENSMUSG00000038932	Tcfl5	-0.650024	1.70811	0.00560897	0.0305269
ENSMUSG00000025534	Gusb	-0.64792	4.11429	1.41871e-09	4.43703e-08
ENSMUSG00000090363	Gm3512	-0.647867	1.2688	0.00207009	0.0138697
ENSMUSG00000050105	Fam110d	-0.647555	1.46855	0.00603061	0.0323591
ENSMUSG00000042129	Rassf4	-0.645386	3.23411	3.86338e-05	0.000501209
ENSMUSG00000006611	Hfe	-0.643703	2.5025	7.83141e-05	0.00092301
ENSMUSG00000016087	Fli1	-0.642618	2.45679	0.00039059	0.0035117
ENSMUSG00000114133	Btf3l4b	-0.640468	0.837583	0.00864068	0.0429195
ENSMUSG00000028871	Rspo1	-0.640367	1.7161	0.000249962	0.00242271
ENSMUSG00000085436	Zfp335os	-0.639945	1.09771	0.00265491	0.0169454
ENSMUSG00000100213	Gm28151	-0.639883	1.41366	0.00123814	0.00916901
ENSMUSG00000121309	ENSMUSG00000121309	-0.638591	2.57847	0.000184903	0.00190943
ENSMUSG00000087305	A430035B10Rik	-0.638231	0.888769	0.00614403	0.0327966
ENSMUSG00000069682	Gm10275	-0.638032	1.3587	0.00148809	0.0106291
ENSMUSG00000070343	Gm10288	-0.637967	1.20321	0.00164136	0.0114758
ENSMUSG00000040164	Kcns1	-0.637095	3.85788	5.34568e-07	1.10406e-05
ENSMUSG00000020707	Rnf135	-0.636403	1.80218	0.000770532	0.00617342
ENSMUSG00000037725	Ckap2	-0.633277	1.49343	0.00105495	0.0080193
ENSMUSG00000029468	P2rx7	-0.632769	3.35288	7.06396e-05	0.000845647
ENSMUSG00000081683	Fzd10	-0.631262	1.56565	0.00125061	0.00924574
ENSMUSG00000058838	Rps27a-ps2	-0.630927	1.10096	0.00530398	0.0292119
ENSMUSG00000021175	Cdca7l	-0.629621	0.742873	0.0064427	0.0339576
ENSMUSG00000026605	Cenpf	-0.629537	2.19466	0.000474204	0.00415676
ENSMUSG00000032369	Plscr1	-0.629069	0.786508	0.00530821	0.0292261
ENSMUSG00000100980	Gm29100	-0.628109	0.961857	0.00516275	0.028596
ENSMUSG00000063171	Rps4l	-0.627948	4.39651	1.45003e-05	0.000213052
ENSMUSG00000032231	Anxa2	-0.627926	4.05398	1.10986e-09	3.50235e-08
ENSMUSG00000015354	Pcolce2	-0.627841	1.37269	0.00250452	0.0161573
ENSMUSG00000058927	Gm10053	-0.62698	3.59107	0.00235003	0.0154084
ENSMUSG00000025154	Arhgap19	-0.626507	2.84884	1.62549e-05	0.00023528
ENSMUSG00000090523	Gypc	-0.626105	1.93708	0.000227401	0.00225924
ENSMUSG00000048677	Tpcn2	-0.624385	1.06286	0.00406957	0.023678
ENSMUSG00000024885	Aldh3b1	-0.624123	1.55448	0.00632676	0.0335153
ENSMUSG00000026039	Sgo2a	-0.62356	0.938999	0.00407694	0.0237063
ENSMUSG00000024014	Pim1	-0.622777	1.79019	0.000501588	0.00432564
ENSMUSG00000026994	Galnt3	-0.621	0.782493	0.0104466	0.0496772
ENSMUSG00000068220	Lgals1	-0.620214	3.5557	1.36074e-07	3.13991e-06
ENSMUSG00000081406	Rps6-ps4	-0.617977	3.70376	6.79235e-06	0.000108442
ENSMUSG00000100706	Gm19744	-0.615461	1.01823	0.00949027	0.0460805
ENSMUSG00000026786	Apbb1ip	-0.614623	2.63851	1.57015e-05	0.000228592
ENSMUSG00000037995	Igsf9	-0.614021	2.50012	5.10948e-05	0.000636921
ENSMUSG00000026728	Vim	-0.611321	5.67433	1.22467e-09	3.85077e-08
ENSMUSG00000005357	Slc1a6	-0.61131	2.8363	1.49569e-06	2.77789e-05
ENSMUSG00000025400	Tac2	-0.610002	2.65601	7.23125e-05	0.000863607
ENSMUSG00000084416	Rpl10a-ps1	-0.609302	1.20391	0.00423514	0.0244074
ENSMUSG00000027313	Chac1	-0.60919	2.79579	0.00776176	0.0392889
ENSMUSG00000008090	Fgfrl1	-0.608692	3.32003	2.78694e-06	4.8616e-05
ENSMUSG00000039934	Gsap	-0.608487	2.27851	0.00179461	0.0123351
ENSMUSG00000032245	Cln6	-0.607734	3.36566	6.1418e-07	1.25078e-05
ENSMUSG00000000317	Bcl6b	-0.60569	2.65744	0.000153435	0.00163758
ENSMUSG00000026288	Inpp5d	-0.604681	4.34149	1.09334e-07	2.56134e-06
ENSMUSG00000022574	Naprt	-0.604456	1.84854	0.00057493	0.0048387
ENSMUSG00000038188	Scarf1	-0.603724	1.50993	0.00318134	0.0194861
ENSMUSG00000020892	Aloxe3	-0.603433	2.53068	0.000226433	0.00225454
ENSMUSG00000022587	Ly6e	-0.602657	7.62767	6.31796e-15	3.23546e-13
ENSMUSG00000078193	Rpl35rt	-0.60235	2.07121	0.00128595	0.00943925
ENSMUSG00000026679	Enkur	-0.601307	1.52587	0.00523495	0.0289133
ENSMUSG00000045193	Cirbp	-0.599689	6.0902	1.02461e-07	2.42172e-06
ENSMUSG00000014599	Csf1	-0.599518	4.09394	1.88747e-08	5.07011e-07
ENSMUSG00000047098	Rnf31	-0.599295	4.17491	1.67039e-10	5.83938e-09
ENSMUSG00000028470	Hint2	-0.597185	2.97262	0.000163421	0.00172108
ENSMUSG00000079553	Kifc1	-0.596947	1.28782	0.0103464	0.0492677
ENSMUSG00000045917	Tmem268	-0.595537	3.7266	2.06419e-06	3.70792e-05
ENSMUSG00000040952	Rps19	-0.594506	6.96483	3.47049e-19	2.30198e-17
ENSMUSG00000026321	Tnfrsf11a	-0.593999	2.53343	2.88646e-05	0.000387884
ENSMUSG00000014444	Piezo1	-0.593366	3.62289	3.37621e-07	7.25533e-06
ENSMUSG00000066760	Psg16	-0.593344	1.59687	0.00989018	0.0475943
ENSMUSG00000027875	Hmgcs2	-0.592774	4.50202	0.000142629	0.00154198
ENSMUSG00000022369	Mtbp	-0.589463	1.07472	0.00865068	0.0429323
ENSMUSG00000070315	4930581F22Rik	-0.589338	1.08477	0.00612696	0.0327357
ENSMUSG00000023224	Serping1	-0.589116	3.2391	2.6847e-05	0.000363649
ENSMUSG00000000120	Ngfr	-0.587062	2.21895	0.000800915	0.00638181
ENSMUSG00000041378	Cldn5	-0.586679	5.51435	1.63617e-09	5.08082e-08
ENSMUSG00000002602	Axl	-0.585872	5.73823	5.33134e-14	2.61549e-12
ENSMUSG00000052056	Zfp217	-0.585659	2.01941	0.00244897	0.0158739
ENSMUSG00000054675	Tmem119	-0.583149	4.89521	9.58594e-10	3.05251e-08
ENSMUSG00000018983	E2f2	-0.583019	0.991462	0.00633633	0.0335473
ENSMUSG00000075569	Rsph10b	-0.581633	2.04264	0.00559441	0.0304571
ENSMUSG00000062248	Cks2	-0.580463	1.14855	0.00495267	0.0276245
ENSMUSG00000074227	Spint2	-0.579938	3.21648	4.62144e-06	7.72545e-05
ENSMUSG00000061882	Ccdc62	-0.577486	1.28803	0.00888465	0.0438054
ENSMUSG00000046688	Tifa	-0.577263	2.52844	9.11098e-05	0.0010498
ENSMUSG00000062382	Ftl1-ps1	-0.57391	3.23229	2.36212e-05	0.000326779
ENSMUSG00000041144	Dnah7b	-0.572774	2.02116	0.00121801	0.00904388
ENSMUSG00000020649	Rrm2	-0.569602	2.40825	0.000301768	0.00284301
ENSMUSG00000023186	Vwa5a	-0.569221	3.57142	8.10294e-06	0.000127278
ENSMUSG00000048721	Fndc9	-0.569069	3.27897	5.57335e-07	1.14702e-05
ENSMUSG00000085207	Gm11767	-0.566813	2.33522	0.000385258	0.00347625
ENSMUSG00000066652	Lefty2	-0.564453	2.14218	0.00152263	0.0108228
ENSMUSG00000022893	Adamts1	-0.564401	3.43662	1.30632e-06	2.47072e-05
ENSMUSG00000113622	Gm49749	-0.561954	3.96531	8.8861e-07	1.75063e-05
ENSMUSG00000005481	Ddx39a	-0.561686	3.43882	4.42602e-07	9.2724e-06
ENSMUSG00000086841	2410006H16Rik	-0.561339	4.06328	2.62914e-08	6.9452e-07
ENSMUSG00000020142	Slc1a4	-0.559056	6.51836	9.19825e-17	5.26465e-15
ENSMUSG00000037816	Fbxw17	-0.559027	2.16145	0.000891598	0.00699303
ENSMUSG00000031805	Jak3	-0.558948	2.97893	0.00110628	0.00834426
ENSMUSG00000104362	Gm37928	-0.558562	3.03938	0.000156626	0.00166582
ENSMUSG00000013584	Aldh1a2	-0.557402	3.65498	1.91339e-05	0.000271785
ENSMUSG00000074825	Itpripl1	-0.556925	1.28548	0.00862019	0.042866
ENSMUSG00000078762	Haus5	-0.556241	2.03394	0.000538704	0.00458206
ENSMUSG00000030346	Rad51ap1	-0.555878	1.50073	0.0030109	0.0187062
ENSMUSG00000022544	Eef2kmt	-0.554694	1.77569	0.000902546	0.00706625
ENSMUSG00000040701	Ap1g2	-0.554347	2.48244	0.00033835	0.00312216
ENSMUSG00000041147	Brca2	-0.554233	2.04192	0.0041666	0.0240838
ENSMUSG00000030055	Rab43	-0.552015	4.18778	0.000163529	0.00172118
ENSMUSG00000020773	Trim47	-0.551373	1.79608	0.00797808	0.0402211
ENSMUSG00000027947	Il6ra	-0.550962	2.87175	9.42453e-05	0.00107813
ENSMUSG00000026921	Egfl7	-0.550384	4.47143	5.80047e-09	1.68194e-07
ENSMUSG00000024818	Slc25a45	-0.546122	2.51757	0.000367185	0.00332861
ENSMUSG00000061983	Rps12	-0.545755	7.14269	1.62001e-16	9.09387e-15
ENSMUSG00000031851	Ntpcr	-0.545517	3.89033	1.81241e-06	3.30652e-05
ENSMUSG00000034522	Zfp395	-0.545147	2.71848	2.60039e-05	0.000353596
ENSMUSG00000029217	Tec	-0.544644	1.53247	0.00943691	0.0458978
ENSMUSG00000099696	2900052N01Rik	-0.542737	4.49867	1.39798e-09	4.37999e-08
ENSMUSG00000049401	Ogfr	-0.54222	6.24808	3.121e-13	1.43845e-11
ENSMUSG00000023755	Rhebl1	-0.54164	1.71374	0.00353301	0.0211763
ENSMUSG00000023066	Rttn	-0.541474	1.5431	0.00747135	0.0380941
ENSMUSG00000032812	Arap1	-0.541365	3.80908	1.22762e-06	2.33955e-05
ENSMUSG00000033033	Calhm2	-0.54122	2.04877	0.00283046	0.0178376
ENSMUSG00000031320	Rps4x	-0.540824	7.7376	2.64547e-17	1.57594e-15
ENSMUSG00000048612	Myof	-0.539989	3.00704	0.000149284	0.00159814
ENSMUSG00000042567	Nek10	-0.538953	2.9768	4.84855e-05	0.000610478
ENSMUSG00000066800	Rnasel	-0.538949	3.58082	3.2909e-07	7.10688e-06
ENSMUSG00000032265	Tent5a	-0.538197	3.05109	0.000946871	0.00736004
ENSMUSG00000037649	H2-DMa	-0.537062	3.72541	2.78856e-07	6.09722e-06
ENSMUSG00000032000	Birc3	-0.533986	1.33048	0.00717955	0.0370007
ENSMUSG00000032327	Stra6	-0.533694	3.31386	0.000905615	0.00708711
ENSMUSG00000061132	Blnk	-0.53325	2.24118	0.00383337	0.0226358
ENSMUSG00000062210	Tnfaip8	-0.531699	2.99956	4.97377e-05	0.000622663
ENSMUSG00000007833	Aldh16a1	-0.530949	2.20149	0.0020471	0.0137263
ENSMUSG00000102729	Gm32444	-0.530861	2.72632	0.00017658	0.00183648
ENSMUSG00000005718	Tfap4	-0.530722	1.27749	0.00628795	0.0333726
ENSMUSG00000040188	Scamp2	-0.529695	4.53975	4.36522e-08	1.11284e-06
ENSMUSG00000096255	Dynlt1b	-0.529693	4.97621	0.000205852	0.00207798
ENSMUSG00000022554	Hgh1	-0.529022	2.90394	0.000232221	0.00229263
ENSMUSG00000040936	Ulk4	-0.527759	2.10086	0.00149587	0.0106629
ENSMUSG00000024446	Rpp21	-0.52692	3.27996	0.000144714	0.00155971
ENSMUSG00000016493	Cd46	-0.526705	3.09382	1.05537e-05	0.000161148
ENSMUSG00000026483	Niban1	-0.526698	2.75728	0.00187313	0.0127451
ENSMUSG00000026058	Khdrbs2	-0.526665	2.92364	9.14252e-05	0.00105274
ENSMUSG00000050410	Tcf19	-0.525579	2.26333	0.000930505	0.00725595
ENSMUSG00000058099	Nfam1	-0.525335	2.14284	0.010323	0.0491833
ENSMUSG00000045827	Serpinb9	-0.525203	3.18743	2.17753e-05	0.000304368
ENSMUSG00000001844	Zdhhc4	-0.524737	3.70128	9.2817e-07	1.82242e-05
ENSMUSG00000074264	Amy1	-0.524225	4.32584	1.91965e-06	3.46605e-05
ENSMUSG00000095597	Rps7-ps3	-0.523586	2.31284	0.000398651	0.00357866
ENSMUSG00000036918	Ttc7	-0.52303	2.9681	0.000172925	0.00180864
ENSMUSG00000067916	Zfp991	-0.522585	2.49241	0.00341222	0.0206163
ENSMUSG00000090698	Apold1	-0.522166	2.87433	4.86859e-05	0.000612561
ENSMUSG00000062906	Hdac10	-0.520709	2.8786	3.24168e-05	0.000429156
ENSMUSG00000023008	Fmnl3	-0.519258	3.67318	2.99308e-06	5.17481e-05
ENSMUSG00000033191	Tie1	-0.518857	3.6647	0.000357586	0.00325846
ENSMUSG00000012848	Rps5	-0.518794	7.1808	5.35438e-15	2.76627e-13
ENSMUSG00000030339	Ltbr	-0.517318	3.14267	2.68126e-05	0.000363464
ENSMUSG00000097023	Mir9-3hg	-0.515274	5.17849	1.54883e-07	3.55054e-06
ENSMUSG00000100891	2810049E08Rik	-0.514255	2.37742	0.00193071	0.013081
ENSMUSG00000054967	Zfp647	-0.514041	1.79235	0.00789246	0.0398353
ENSMUSG00000085084	4930570G19Rik	-0.514007	3.26001	0.000191324	0.00196877
ENSMUSG00000034842	Art3	-0.513756	1.76291	0.00575875	0.0311293
ENSMUSG00000003849	Nqo1	-0.513446	1.44917	0.00941763	0.0458295
ENSMUSG00000105987	AI506816	-0.512125	3.90917	3.13161e-07	6.79641e-06
ENSMUSG00000024087	Cyp1b1	-0.511977	3.33033	0.00228083	0.0150118
ENSMUSG00000040740	Slc25a34	-0.511951	3.05003	0.00247656	0.0160231
ENSMUSG00000016028	Celsr1	-0.508622	2.16775	0.000629979	0.00520937
ENSMUSG00000000957	Mmp14	-0.508041	4.54821	6.87427e-08	1.67449e-06
ENSMUSG00000038260	Trpm4	-0.50797	3.35201	0.00129553	0.00948521
ENSMUSG00000035673	Sbno2	-0.507849	4.05421	4.37226e-08	1.11302e-06
ENSMUSG00000015134	Aldh1a3	-0.507837	1.69842	0.00933027	0.0455563
ENSMUSG00000092492	B230208B08Rik	-0.507664	2.83001	0.005585	0.0304203
ENSMUSG00000035125	Gcfc2	-0.507289	2.80236	0.000146768	0.00157796
ENSMUSG00000038539	Atf5	-0.507087	4.46221	5.99786e-05	0.000733053
ENSMUSG00000022548	Apod	-0.506323	6.26139	9.30931e-05	0.00106779
ENSMUSG00000015839	Nfe2l2	-0.506069	3.93123	1.05461e-06	2.04319e-05
ENSMUSG00000037344	Slc12a9	-0.505414	4.79147	9.38617e-11	3.3825e-09
ENSMUSG00000062611	Rps3a2	-0.504811	2.54854	0.000875801	0.00687837
ENSMUSG00000053897	Slc39a8	-0.504725	3.13927	7.79169e-05	0.000919566
ENSMUSG00000048445	Ccdc57	-0.504658	2.92618	0.000115801	0.00128608
ENSMUSG00000121066	Gm57402	-0.502551	2.05868	0.00449632	0.025518
ENSMUSG00000031371	Haus7	-0.501476	2.16733	0.0012711	0.00935378
ENSMUSG00000025283	Sat1	-0.501216	5.4273	1.063e-09	3.36053e-08
ENSMUSG00000026972	Arrdc1	-0.501124	2.55106	0.000760216	0.0061068
ENSMUSG00000039787	Cercam	-0.499829	2.14968	0.00189479	0.0128625
ENSMUSG00000113309	Gm48408	-0.499433	2.29092	0.00414271	0.0239694
ENSMUSG00000120999	Gm17586	-0.49728	2.32953	0.00302561	0.018771
ENSMUSG00000074622	Mafb	-0.495313	4.5026	4.97938e-08	1.24406e-06
ENSMUSG00000039501	Znfx1	-0.49485	5.52679	6.97813e-11	2.57295e-09
ENSMUSG00000092203	1110038B12Rik	-0.494187	2.94014	0.000145179	0.00156279
ENSMUSG00000022912	Pros1	-0.493282	3.76491	1.80974e-05	0.00025853
ENSMUSG00000032431	Crtap	-0.492671	2.48009	0.00111453	0.00839562
ENSMUSG00000120104	4122401K19Rik	-0.491647	2.28257	0.00431916	0.0247531
ENSMUSG00000030844	Rgs10	-0.491585	4.82522	5.47308e-07	1.12904e-05
ENSMUSG00000086583	Gm15500	-0.490877	4.4897	9.82112e-07	1.90907e-05
ENSMUSG00000050071	Bex1	-0.490793	5.69428	6.67848e-08	1.63819e-06
ENSMUSG00000024621	Csf1r	-0.490391	6.64129	8.13844e-12	3.25426e-10
ENSMUSG00000060512	0610040J01Rik	-0.489928	2.60347	0.000522966	0.00447472
ENSMUSG00000070527	Mkrn3	-0.489906	3.97787	8.90785e-07	1.75294e-05
ENSMUSG00000079057	Cyp4v3	-0.489866	2.85686	0.000522996	0.00447472
ENSMUSG00000036256	Igfbp7	-0.489625	4.78932	5.40897e-09	1.57625e-07
ENSMUSG00000028234	Rps20	-0.486693	6.94908	9.59732e-13	4.19171e-11
ENSMUSG00000027401	Tgm3	-0.48641	2.55051	0.00164795	0.0115126
ENSMUSG00000030707	Coro1a	-0.485333	6.54667	5.51169e-08	1.36537e-06
ENSMUSG00000024590	Lmnb1	-0.485221	3.76245	0.000208203	0.00209688
ENSMUSG00000001751	Naglu	-0.485006	3.30074	0.000248248	0.00240876
ENSMUSG00000043165	Loricrin	-0.484989	2.57179	0.00241027	0.0156966
ENSMUSG00000118458	Gm10599	-0.484542	2.06949	0.00732373	0.0374997
ENSMUSG00000028133	Rwdd3	-0.483965	2.05877	0.00255285	0.016415
ENSMUSG00000061979	Rcc1l	-0.482584	3.45362	0.000231345	0.00228793
ENSMUSG00000029163	Emilin1	-0.480698	2.16732	0.00148753	0.0106291
ENSMUSG00000039163	Cmc1	-0.479455	3.19956	0.00019366	0.00198233
ENSMUSG00000017057	Il13ra1	-0.474853	3.24198	0.000439189	0.00388482
ENSMUSG00000006589	Aprt	-0.474711	4.48084	5.01613e-06	8.28015e-05
ENSMUSG00000062300	Nectin2	-0.474186	3.74353	1.44002e-05	0.000212115
ENSMUSG00000027404	Snrpb	-0.473972	5.44413	5.62035e-09	1.63242e-07
ENSMUSG00000079659	Tmem243	-0.473865	2.02622	0.00516826	0.0286174
ENSMUSG00000020941	Map3k14	-0.473351	2.23222	0.00429462	0.024669
ENSMUSG00000018169	Mfng	-0.471793	2.12932	0.00504888	0.0280985
ENSMUSG00000038650	Rnh1	-0.470468	4.08579	1.51866e-06	2.81162e-05
ENSMUSG00000012017	Scarf2	-0.470386	2.23039	0.00463992	0.0261887
ENSMUSG00000037254	Itih2	-0.469182	3.07657	0.00864566	0.0429195
ENSMUSG00000032397	Tipin	-0.467476	3.3841	0.000331189	0.0030674
ENSMUSG00000034663	Bmp2k	-0.466377	3.94318	1.37476e-06	2.58343e-05
ENSMUSG00000034595	Ppp1r18	-0.464663	3.90872	9.36178e-05	0.00107235
ENSMUSG00000031807	Pgls	-0.464443	4.79151	3.38059e-06	5.79899e-05
ENSMUSG00000032518	Rpsa	-0.464362	9.31549	2.10868e-13	9.8484e-12
ENSMUSG00000060538	Tmem219	-0.464264	3.17814	0.000354875	0.0032405
ENSMUSG00000042419	Nfkbil1	-0.464111	3.0896	0.00021548	0.00216218
ENSMUSG00000028465	Tln1	-0.464069	5.54062	4.65347e-08	1.17436e-06
ENSMUSG00000036913	Trim67	-0.463876	3.66559	6.8023e-05	0.000819364
ENSMUSG00000011179	Odc1	-0.463352	5.71204	3.25805e-10	1.09945e-08
ENSMUSG00000117901	Gm54798	-0.462668	2.54524	0.00480136	0.0269091
ENSMUSG00000036461	Elf1	-0.461781	2.97006	0.000499189	0.00431743
ENSMUSG00000025358	Cdk2	-0.461285	2.04887	0.00401068	0.0234613
ENSMUSG00000029710	Ephb4	-0.459668	2.79024	0.000294488	0.00278191
ENSMUSG00000029622	Arpc1b	-0.459145	5.09278	1.19424e-06	2.2834e-05
ENSMUSG00000022269	Marchf11	-0.458403	1.87749	0.00950917	0.046134
ENSMUSG00000001946	Esam	-0.457394	4.07521	5.84814e-06	9.48374e-05
ENSMUSG00000024742	Fen1	-0.457134	3.46297	0.00038702	0.00348497
ENSMUSG00000037761	Actr5	-0.456736	2.45854	0.00168042	0.0116882
ENSMUSG00000048424	Ranbp3l	-0.456032	2.56298	0.00276725	0.0175346
ENSMUSG00000025511	Tspan4	-0.455359	3.97316	1.50394e-05	0.000220234
ENSMUSG00000018537	Pcgf2	-0.455144	4.40362	2.98647e-06	5.16849e-05
ENSMUSG00000026857	Ntmt1	-0.455108	4.36491	5.07284e-05	0.000633255
ENSMUSG00000079484	Phyhd1	-0.45387	3.07099	0.000854513	0.00674141
ENSMUSG00000022747	St3gal6	-0.453867	3.88845	0.000103581	0.00116365
ENSMUSG00000027215	Cd82	-0.453781	3.08703	0.00438754	0.025006
ENSMUSG00000046169	Adamts6	-0.453633	2.62971	0.00315138	0.0193457
ENSMUSG00000001082	Mfsd10	-0.453134	3.78022	8.63014e-06	0.000134474
ENSMUSG00000068854	H2bc21	-0.451559	2.50915	0.00167479	0.0116629
ENSMUSG00000091509	Gm17066	-0.451257	3.04451	0.00381129	0.0225358
ENSMUSG00000121395	ENSMUSG00000121395	-0.451155	5.86271	3.15413e-06	5.43181e-05
ENSMUSG00000006498	Ptbp1	-0.451107	5.22797	6.36572e-08	1.56586e-06
ENSMUSG00000039168	Dap	-0.44994	2.77181	0.00126367	0.00931874
ENSMUSG00000021457	Syk	-0.449769	2.71085	0.00253378	0.0163089
ENSMUSG00000029027	Dffb	-0.449587	2.44826	0.00128865	0.00945517
ENSMUSG00000039994	Timeless	-0.448598	2.31633	0.00286813	0.0180109
ENSMUSG00000033434	Gtpbp6	-0.44825	4.2831	2.02557e-05	0.000286096
ENSMUSG00000079592	C1qtnf5	-0.447954	2.91188	0.000956946	0.00742247
ENSMUSG00000041219	Arhgap11a	-0.446423	2.65699	0.00155508	0.0109777
ENSMUSG00000121091	Gm56861	-0.444194	2.00545	0.00819694	0.0410836
ENSMUSG00000043015	Nemp2	-0.443738	2.15368	0.00641116	0.0338514
ENSMUSG00000005142	Man2b1	-0.443522	5.70734	1.18869e-11	4.64704e-10
ENSMUSG00000016528	Mapkapk2	-0.442941	4.82519	1.63497e-06	3.00156e-05
ENSMUSG00000022817	Itgb5	-0.441807	5.25137	3.86054e-07	8.16589e-06
ENSMUSG00000010307	Tmem86a	-0.441233	4.31449	1.39034e-06	2.6099e-05
ENSMUSG00000059182	Skap2	-0.440368	3.15484	0.00166171	0.0115857
ENSMUSG00000015396	Cd83	-0.440327	3.73653	5.25219e-05	0.000652389
ENSMUSG00000021408	Ripk1	-0.439898	2.95326	0.000476424	0.00416996
ENSMUSG00000037563	Rps16	-0.439379	6.87113	8.91003e-08	2.13768e-06
ENSMUSG00000098188	Sowahc	-0.438415	3.60615	2.55788e-05	0.0003489
ENSMUSG00000029560	Snx8	-0.438291	3.74129	0.000142979	0.00154481
ENSMUSG00000024601	Isoc1	-0.437651	5.12917	1.82531e-07	4.15175e-06
ENSMUSG00000059070	Rpl18	-0.436919	6.7797	1.09391e-07	2.56134e-06
ENSMUSG00000032586	Traip	-0.43612	4.09044	6.19746e-05	0.000755339
ENSMUSG00000020427	Igfbp3	-0.435033	5.09939	0.00675354	0.0352763
ENSMUSG00000084349	Rpl3-ps1	-0.434722	3.35356	0.00291915	0.0182723
ENSMUSG00000072889	Nfxl1	-0.434221	3.59339	0.000106323	0.00118987
ENSMUSG00000031925	Maml2	-0.43313	3.27987	0.000708688	0.00573831
ENSMUSG00000006930	Hap1	-0.430042	7.56104	2.73545e-09	8.21761e-08
ENSMUSG00000066705	Fxyd6	-0.429833	7.74869	9.80778e-09	2.74195e-07
ENSMUSG00000010660	Plcd1	-0.429413	2.99557	0.00107962	0.00817485
ENSMUSG00000022969	Il10rb	-0.429214	2.7857	0.00674991	0.0352763
ENSMUSG00000022768	Ccdc116	-0.428959	2.30093	0.00862775	0.0428914
ENSMUSG00000022913	Psmg1	-0.426824	2.76155	0.0010109	0.00776532
ENSMUSG00000025395	Prim1	-0.426727	2.15997	0.0057398	0.0310556
ENSMUSG00000022500	Litaf	-0.426699	3.40061	0.000350544	0.00320727
ENSMUSG00000052336	Cx3cr1	-0.426158	5.8031	2.13303e-08	5.67749e-07
ENSMUSG00000030766	Arhgap17	-0.425542	3.30921	0.000485089	0.00423311
ENSMUSG00000029730	Mcm7	-0.425179	3.90718	7.67506e-06	0.000120991
ENSMUSG00000037805	Rpl10a	-0.423526	7.18285	1.10384e-08	3.05412e-07
ENSMUSG00000024725	Ostf1	-0.421985	3.93295	3.23786e-05	0.000429156
ENSMUSG00000002835	Chaf1a	-0.421562	2.83471	0.00139686	0.0100879
ENSMUSG00000054836	Elp6	-0.419446	3.35038	0.0013245	0.00966154
ENSMUSG00000070713	Hmgn2-ps	-0.414468	2.79453	0.00112657	0.00846449
ENSMUSG00000037572	Wdhd1	-0.414144	2.90998	0.00453346	0.0256788
ENSMUSG00000044562	Rasip1	-0.413451	3.26184	0.00353237	0.0211763
ENSMUSG00000019158	Tmem160	-0.413175	4.20944	1.26318e-05	0.000189428
ENSMUSG00000056220	Pla2g4a	-0.41295	2.45636	0.00545991	0.0298532
ENSMUSG00000047675	Rps8	-0.412843	7.47258	1.94919e-10	6.72009e-09
ENSMUSG00000021809	Nudt13	-0.412177	2.9364	0.00845147	0.0420868
ENSMUSG00000004446	Bid	-0.41142	3.61881	0.00105194	0.00800124
ENSMUSG00000095677	Dynlt1f	-0.411333	2.99993	0.00811254	0.0407582
ENSMUSG00000031799	Tpm4	-0.411241	5.54259	1.28691e-05	0.000192148
ENSMUSG00000035914	Cd276	-0.411056	4.1631	2.61995e-05	0.00035598
ENSMUSG00000071451	Psmg4	-0.410652	2.63059	0.00665396	0.034881
ENSMUSG00000019874	Fabp7	-0.410581	6.42039	0.000949333	0.00736768
ENSMUSG00000047832	Cdca4	-0.410485	2.85537	0.00266248	0.0169813
ENSMUSG00000100691	2010320M18Rik	-0.410089	2.88455	0.00331268	0.0201411
ENSMUSG00000001025	S100a6	-0.409789	3.50968	0.00221506	0.0146727
ENSMUSG00000024538	Ppic	-0.40952	3.56776	0.000369897	0.00334973
ENSMUSG00000028163	Nfkb1	-0.408923	4.13717	8.48444e-05	0.000985388
ENSMUSG00000025521	Tmem192	-0.408754	3.3289	0.00179526	0.0123351
ENSMUSG00000014294	Ndufa2	-0.408407	5.21685	8.00491e-05	0.000939872
ENSMUSG00000038214	Bend3	-0.408343	2.83008	0.00227192	0.0149813
ENSMUSG00000076437	Selenoh	-0.407942	4.16878	0.000250234	0.002424
ENSMUSG00000071341	Egr4	-0.406849	5.21837	9.6527e-05	0.00109777
ENSMUSG00000023886	Smoc2	-0.406194	3.20229	0.00304527	0.0188462
ENSMUSG00000020472	Zkscan17	-0.405606	4.09034	0.000537716	0.0045783
ENSMUSG00000042901	Aida	-0.405231	5.59602	2.5067e-09	7.58243e-08
ENSMUSG00000033159	Cnppd1	-0.405052	4.85029	1.16308e-06	2.23112e-05
ENSMUSG00000028312	Smc2	-0.404526	3.38769	0.00100349	0.00772531
ENSMUSG00000062328	Rpl17	-0.404486	7.84055	5.03019e-10	1.65599e-08
ENSMUSG00000047415	Gpr68	-0.402923	3.48499	0.00312845	0.0192454
ENSMUSG00000052395	Rft1	-0.401217	3.10135	0.00107261	0.00812884
ENSMUSG00000026956	Uap1l1	-0.401121	3.04349	0.00142684	0.0102669
ENSMUSG00000046352	Gjb2	-0.399887	3.21988	0.000921445	0.00719812
ENSMUSG00000028683	Eif2b3	-0.399804	3.63032	0.00120601	0.00896523
ENSMUSG00000043716	Rpl7	-0.398572	7.99281	4.96954e-12	2.04311e-10
ENSMUSG00000027204	Fbn1	-0.398451	3.75416	0.000707571	0.00573722
ENSMUSG00000024644	Cndp2	-0.397788	5.50342	2.7603e-05	0.000373312
ENSMUSG00000002233	Rhoc	-0.397449	4.17877	0.000232042	0.00229215
ENSMUSG00000026466	Tor1aip1	-0.397391	4.95863	1.28804e-06	2.44672e-05
ENSMUSG00000047867	Gimap6	-0.397327	2.83662	0.00495797	0.0276453
ENSMUSG00000007892	Rplp1	-0.396485	7.95534	1.7526e-08	4.75155e-07
ENSMUSG00000035357	Pdzrn3	-0.39583	5.45557	2.1657e-07	4.8566e-06
ENSMUSG00000042992	Borcs5	-0.394404	4.55513	2.39885e-06	4.2395e-05
ENSMUSG00000039221	Rpl22l1	-0.393938	4.7933	0.000116012	0.0012876
ENSMUSG00000049036	Tmem121	-0.39376	3.85443	0.00253135	0.0162993
ENSMUSG00000049969	Plekhf2	-0.392879	3.35184	0.00179866	0.0123391
ENSMUSG00000025351	Cd63	-0.392261	5.0726	1.37092e-06	2.57898e-05
ENSMUSG00000016559	H3f3b	-0.39194	7.92252	2.05237e-09	6.29497e-08
ENSMUSG00000042726	Trafd1	-0.391547	6.13181	1.08719e-08	3.01282e-07
ENSMUSG00000028651	Ppie	-0.391148	3.02178	0.00101242	0.00777018
ENSMUSG00000034349	Smc4	-0.391105	3.5795	0.000502931	0.00433267
ENSMUSG00000036606	Plxnb2	-0.391064	6.07033	4.68346e-08	1.17853e-06
ENSMUSG00000037103	Dcaf15	-0.390523	4.26504	7.47407e-05	0.000887463
ENSMUSG00000085030	2810455O05Rik	-0.390357	3.3429	0.00602608	0.0323447
ENSMUSG00000023966	Rsph9	-0.389957	3.47178	0.00401996	0.0234842
ENSMUSG00000049482	Ctu2	-0.389908	3.51952	0.000495239	0.00429486
ENSMUSG00000057554	Lgals8	-0.389838	4.43729	1.06329e-05	0.000162075
ENSMUSG00000020009	Ifngr1	-0.388893	4.01071	0.000231484	0.00228793
ENSMUSG00000028643	Svbp	-0.388684	3.2715	0.00129082	0.00946709
ENSMUSG00000002059	Rab34	-0.388177	4.25606	8.24054e-05	0.000962807
ENSMUSG00000027752	Exosc8	-0.387941	3.16374	0.00243311	0.0158062
ENSMUSG00000006418	Rnf114	-0.387826	5.65933	9.10456e-08	2.18136e-06
ENSMUSG00000029470	P2rx4	-0.385508	2.97888	0.00733852	0.0375314
ENSMUSG00000108414	Snhg1	-0.385501	3.60638	0.00189727	0.0128694
ENSMUSG00000068196	Col8a1	-0.383144	2.94483	0.00920847	0.0450655
ENSMUSG00000050211	Pla2g4e	-0.383007	3.99225	0.000641032	0.00527586
ENSMUSG00000027613	Eif6	-0.382777	5.04196	1.29097e-06	2.44963e-05
ENSMUSG00000026765	Lypd6b	-0.382744	3.85318	0.00032192	0.00299422
ENSMUSG00000047843	Bri3	-0.382555	4.56834	3.71518e-05	0.000484495
ENSMUSG00000039759	Thap3	-0.382445	2.93439	0.0026105	0.0167045
ENSMUSG00000097156	Gm3764	-0.381879	6.34831	2.37738e-07	5.27725e-06
ENSMUSG00000072949	Acot1	-0.381726	3.43828	0.00284506	0.0178917
ENSMUSG00000031328	Flna	-0.381176	6.70361	1.465e-08	4.00905e-07
ENSMUSG00000057219	Armc7	-0.379539	2.92541	0.00878153	0.043434
ENSMUSG00000028495	Rps6	-0.37934	7.79007	5.13335e-10	1.68678e-08
ENSMUSG00000027239	Mdk	-0.37828	3.7405	0.000333643	0.0030836
ENSMUSG00000019823	Mical1	-0.377968	3.42383	0.000632693	0.00522935
ENSMUSG00000036814	Slc6a20a	-0.377248	4.62905	0.00159164	0.0111881
ENSMUSG00000024824	Rad9a	-0.376418	2.95668	0.0104614	0.0497186
ENSMUSG00000047428	Dlk2	-0.375374	4.40365	0.00270717	0.0172155
ENSMUSG00000074415	Mir100hg	-0.37407	5.559	2.89419e-06	5.03365e-05
ENSMUSG00000063802	Hspbp1	-0.373235	6.09384	2.33084e-07	5.18049e-06
ENSMUSG00000040824	Snrpd2	-0.37188	5.54299	0.000138851	0.00150578
ENSMUSG00000045731	Pnoc	-0.371434	3.49244	0.00321005	0.0196302
ENSMUSG00000004626	Stxbp2	-0.371157	4.34513	0.000182413	0.00188593
ENSMUSG00000028081	Rps3a1	-0.36983	8.11477	9.04216e-09	2.54605e-07
ENSMUSG00000050022	Amz1	-0.36959	3.94433	0.000239354	0.00234455
ENSMUSG00000001555	Fkbp10	-0.369534	3.88706	0.000292446	0.00276561
ENSMUSG00000030978	Rrm1	-0.369465	4.17196	4.04684e-05	0.000520384
ENSMUSG00000029810	Tmem176b	-0.368505	4.80175	5.94797e-06	9.63669e-05
ENSMUSG00000031813	Mvb12a	-0.367664	3.65602	0.00259487	0.0166126
ENSMUSG00000006386	Tek	-0.367499	3.68902	0.000774746	0.00619868
ENSMUSG00000025794	Rpl14	-0.367196	7.17153	3.28988e-08	8.54039e-07
ENSMUSG00000003438	Timm50	-0.366121	4.65996	0.000253595	0.00245249
ENSMUSG00000006315	Tmem147	-0.365684	5.19861	0.000516008	0.0044283
ENSMUSG00000030536	Iqgap1	-0.365358	4.84132	4.84039e-05	0.000609889
ENSMUSG00000015312	Gadd45b	-0.365163	3.44085	0.00752647	0.038286
ENSMUSG00000031015	Swap70	-0.3643	3.85719	0.00100578	0.00773617
ENSMUSG00000002307	Daxx	-0.362837	4.49476	0.000231454	0.00228793
ENSMUSG00000059326	Csf2ra	-0.36258	3.6665	0.00097975	0.00757587
ENSMUSG00000026365	Cfh	-0.362431	5.34962	0.000444801	0.00392679
ENSMUSG00000025290	Rps24	-0.362395	8.24054	9.42633e-08	2.24922e-06
ENSMUSG00000054000	Tusc1	-0.362376	2.93436	0.00514914	0.0285386
ENSMUSG00000023034	Nr4a1	-0.362002	5.84927	0.00723003	0.0371885
ENSMUSG00000038274	Fau	-0.361805	7.33039	2.00078e-07	4.50988e-06
ENSMUSG00000021242	Npc2	-0.361387	6.06877	7.87631e-07	1.57652e-05
ENSMUSG00000048001	Hes5	-0.360834	3.13931	0.00363128	0.0216911
ENSMUSG00000010067	Rassf1	-0.360393	3.26005	0.00258175	0.0165569
ENSMUSG00000015377	Dennd6b	-0.359462	5.58085	2.34379e-05	0.000324499
ENSMUSG00000035704	Alg8	-0.359075	2.43493	0.00966277	0.0466763
ENSMUSG00000028382	Ptbp3	-0.35897	4.93066	6.40998e-06	0.000102995
ENSMUSG00000060216	Arrb2	-0.358543	5.58865	1.89456e-06	3.42782e-05
ENSMUSG00000016024	Lbp	-0.358258	2.86145	0.010467	0.0497186
ENSMUSG00000031827	Cotl1	-0.357986	5.8458	4.64187e-08	1.17313e-06
ENSMUSG00000100755	Rps23-ps1	-0.356921	2.95869	0.00469556	0.0264346
ENSMUSG00000053091	Lins1	-0.356812	2.65146	0.010207	0.0487714
ENSMUSG00000003038	Hmgn2	-0.356613	7.07634	1.25378e-08	3.46353e-07
ENSMUSG00000064358	mt-Co3	-0.356595	10.6938	1.93494e-05	0.000274624
ENSMUSG00000042178	Armc5	-0.356396	3.62113	0.00114016	0.00855558
ENSMUSG00000047215	Rpl9	-0.356051	7.6684	2.79693e-09	8.38793e-08
ENSMUSG00000023015	Racgap1	-0.355563	3.64935	0.00290037	0.0181808
ENSMUSG00000024766	Lipo3	-0.355197	3.03904	0.00449947	0.0255227
ENSMUSG00000018932	Map2k3	-0.354979	3.15653	0.00627142	0.0333144
ENSMUSG00000060548	Tnfrsf19	-0.35495	6.56148	1.29884e-07	3.00899e-06
ENSMUSG00000051518	Rps19bp1	-0.354587	3.78461	0.000937305	0.00729923
ENSMUSG00000022971	Ifnar2	-0.353808	3.78993	0.000643506	0.00529373
ENSMUSG00000021420	Fars2	-0.353105	3.70639	0.00137335	0.00994333
ENSMUSG00000045128	Rpl18a	-0.352964	7.83256	2.92336e-09	8.7521e-08
ENSMUSG00000044469	Tnfaip8l1	-0.352863	3.1697	0.00614585	0.0327966
ENSMUSG00000020372	Rack1	-0.352691	7.30138	2.90146e-07	6.32042e-06
ENSMUSG00000067925	Rtl8a	-0.352253	6.81773	2.39845e-06	4.2395e-05
ENSMUSG00000039307	Hexd	-0.352089	4.70308	0.000138833	0.00150578
ENSMUSG00000027330	Cdc25b	-0.352024	3.25113	0.00329473	0.0200513
ENSMUSG00000041046	Ramp3	-0.35199	4.55078	0.000161157	0.0017003
ENSMUSG00000022673	Mcm4	-0.351581	3.18597	0.00556289	0.0303516
ENSMUSG00000028811	Yars1	-0.351398	6.7845	3.65458e-05	0.000478731
ENSMUSG00000038900	Rpl12	-0.351152	7.81426	2.00262e-08	5.34664e-07
ENSMUSG00000015217	Hmgb3	-0.350617	5.8761	2.93029e-05	0.000392663
ENSMUSG00000007613	Tgfbr1	-0.349786	4.97739	7.2413e-05	0.000863924
ENSMUSG00000049904	Tmem17	-0.349643	2.68123	0.0093609	0.045655
ENSMUSG00000067274	Rplp0	-0.349631	8.37435	6.62841e-09	1.90312e-07
ENSMUSG00000040414	Slc25a28	-0.348773	4.37909	9.99763e-05	0.00113113
ENSMUSG00000067594	Krt77	-0.348421	3.44809	0.00668867	0.0350315
ENSMUSG00000050708	Ftl1	-0.348174	8.46978	3.0678e-06	5.29355e-05
ENSMUSG00000027296	Itpka	-0.347807	6.8881	2.13086e-05	0.000299108
ENSMUSG00000040274	Cdk6	-0.347531	3.0389	0.00514267	0.0285118
ENSMUSG00000071477	Zfp777	-0.346995	4.92387	2.1481e-05	0.000300734
ENSMUSG00000030737	Slco2b1	-0.346771	4.73295	0.00133736	0.00971889
ENSMUSG00000049775	Tmsb4x	-0.346702	9.78522	4.67604e-08	1.17836e-06
ENSMUSG00000016494	Cd34	-0.34652	6.0885	1.05292e-07	2.47861e-06
ENSMUSG00000021715	Cwc27	-0.34646	3.76882	0.00304199	0.0188326
ENSMUSG00000109536	9330162G02Rik	-0.3464	4.37957	0.000714019	0.00577347
ENSMUSG00000029614	Rpl6	-0.345891	8.14368	1.29101e-08	3.56076e-07
ENSMUSG00000033909	Usp36	-0.345281	4.97697	6.84212e-06	0.000109137
ENSMUSG00000042406	Atf4	-0.345002	6.85138	0.000582874	0.00488762
ENSMUSG00000001909	Trmt1	-0.344815	5.39806	2.2e-06	3.92771e-05
ENSMUSG00000024186	Rgs11	-0.344368	4.30359	0.00100042	0.00770917
ENSMUSG00000042462	Dctpp1	-0.344164	3.70372	0.00143235	0.0102939
ENSMUSG00000021948	Prkcd	-0.343753	4.30922	0.000666574	0.00545023
ENSMUSG00000028545	Bend5	-0.343688	3.43627	0.00636798	0.0336742
ENSMUSG00000061360	Phf5a	-0.343364	4.55913	0.000383593	0.00346301
ENSMUSG00000028653	Trit1	-0.342432	3.6547	0.00204197	0.0137023
ENSMUSG00000029022	Miip	-0.342214	3.32468	0.00844352	0.0420591
ENSMUSG00000025138	Sirt7	-0.34199	4.51002	0.000189429	0.00195089
ENSMUSG00000003970	Rpl8	-0.341883	7.6751	5.77596e-07	1.18316e-05
ENSMUSG00000015776	Med22	-0.341554	4.89676	1.42187e-05	0.000209795
ENSMUSG00000061111	Mcrip1	-0.341537	6.02401	8.63587e-05	0.000997192
ENSMUSG00000074129	Rpl13a	-0.34131	8.28427	9.32227e-07	1.82776e-05
ENSMUSG00000022436	Sh3bp1	-0.341171	3.11323	0.00588623	0.0317302
ENSMUSG00000050875	Minar2	-0.341022	6.09819	3.17204e-08	8.25485e-07
ENSMUSG00000041598	Cdc42ep4	-0.339771	4.88516	0.00388202	0.0228452
ENSMUSG00000004665	Cnn2	-0.338539	3.25025	0.00295065	0.01843
ENSMUSG00000006333	Rps9	-0.336952	7.50951	1.42713e-06	2.67038e-05
ENSMUSG00000075020	Mir670hg	-0.336686	2.95053	0.00911381	0.0447363
ENSMUSG00000004040	Stat3	-0.335915	5.58203	5.34219e-06	8.76879e-05
ENSMUSG00000024048	Myl12a	-0.335746	4.22579	0.00379724	0.0224679
ENSMUSG00000002477	Snrpd1	-0.335602	5.40452	6.59187e-05	0.000795659
ENSMUSG00000027550	Lrrcc1	-0.334415	4.27012	0.000491846	0.00427587
ENSMUSG00000031295	Phka2	-0.334147	4.44995	0.000233219	0.00230038
ENSMUSG00000073982	Rhog	-0.333836	4.30147	0.00295639	0.0184593
ENSMUSG00000035517	Tdrd7	-0.333751	4.84329	2.49774e-05	0.000341761
ENSMUSG00000067199	Frat1	-0.3333	3.70891	0.00156741	0.0110469
ENSMUSG00000020415	Pttg1	-0.333105	4.18367	0.00026989	0.00257875
ENSMUSG00000103897	Pcdhga8	-0.332913	3.784	0.00990206	0.047631
ENSMUSG00000058600	Rpl30	-0.332685	6.9309	2.54333e-07	5.61713e-06
ENSMUSG00000022577	Ly6h	-0.332651	7.50626	1.44774e-05	0.000213052
ENSMUSG00000020253	Ppm1m	-0.332359	4.04555	0.000348928	0.00319452
ENSMUSG00000008200	Fnbp4	-0.332344	5.63934	8.6046e-07	1.70091e-05
ENSMUSG00000062006	Rpl34	-0.332299	6.75572	8.90461e-08	2.13768e-06
ENSMUSG00000046287	Pnma3	-0.332195	5.08992	1.70241e-05	0.000244996
ENSMUSG00000036036	Zfp57	-0.331205	4.28961	0.00187779	0.0127719
ENSMUSG00000032109	Nlrx1	-0.330418	3.3095	0.00733793	0.0375314
ENSMUSG00000039263	Npepl1	-0.32969	3.73671	0.00195873	0.0132401
ENSMUSG00000002661	Alkbh7	-0.329347	3.0282	0.0104014	0.0495028
ENSMUSG00000051851	Rtl8c	-0.329187	3.94665	0.00715113	0.0368693
ENSMUSG00000025159	Mms19	-0.329116	4.76821	2.31941e-05	0.000322399
ENSMUSG00000026880	Stom	-0.329103	3.82943	0.00300238	0.0186865
ENSMUSG00000024042	Sik1	-0.328851	4.10453	0.00615923	0.032838
ENSMUSG00000021432	Slc35b3	-0.328673	3.28253	0.00588061	0.0317097
ENSMUSG00000020464	Pnpt1	-0.32866	4.24304	0.000607693	0.00505143
ENSMUSG00000029168	Dpysl5	-0.327961	7.48247	6.75346e-05	0.000814601
ENSMUSG00000094724	Rnaset2b	-0.327166	4.4797	0.00656243	0.0344631
ENSMUSG00000027655	Dhx35	-0.327084	3.69763	0.00369743	0.0220291
ENSMUSG00000047844	Bex4	-0.326978	4.3975	0.000341185	0.0031384
ENSMUSG00000078619	Smarcd2	-0.326459	3.80401	0.00137853	0.00996431
ENSMUSG00000020133	2310011J03Rik	-0.326377	4.76707	6.55618e-05	0.000791896
ENSMUSG00000086859	Snhg20	-0.326235	4.06397	0.0100545	0.0481922
ENSMUSG00000024247	Pkdcc	-0.325446	3.47709	0.0078448	0.0396348
ENSMUSG00000070348	Ccnd1	-0.325143	5.50126	7.47923e-05	0.000887474
ENSMUSG00000026278	Bok	-0.32429	4.37688	0.00363024	0.0216911
ENSMUSG00000020834	Dhrs13	-0.324212	3.57771	0.00558488	0.0304203
ENSMUSG00000025608	Podxl	-0.323871	4.77739	0.00044483	0.00392679
ENSMUSG00000002147	Stat6	-0.32336	3.34521	0.00882417	0.043571
ENSMUSG00000038685	Rtel1	-0.322871	3.98633	0.00177429	0.0122246
ENSMUSG00000039294	Cybc1	-0.322733	4.36092	0.00052968	0.00452087
ENSMUSG00000045996	Polr2k	-0.322387	3.48968	0.00361694	0.0216319
ENSMUSG00000079036	Alkbh1	-0.321917	3.59598	0.00238016	0.0155429
ENSMUSG00000020460	Rps27a	-0.321054	7.45897	1.35574e-07	3.13252e-06
ENSMUSG00000024661	Fth1	-0.320327	9.78944	1.25929e-07	2.93288e-06
ENSMUSG00000050002	Idnk	-0.32023	3.55203	0.00467249	0.0263301
ENSMUSG00000040263	Klhdc4	-0.320109	4.34212	0.000966388	0.00748576
ENSMUSG00000007589	Tinf2	-0.319744	3.23936	0.00909854	0.0446739
ENSMUSG00000036833	Pnpla7	-0.319691	3.57472	0.00805853	0.040545
ENSMUSG00000010755	Cars1	-0.319597	5.54315	0.00102799	0.00786555
ENSMUSG00000091811	Inafm1	-0.319518	4.31151	0.00318204	0.0194861
ENSMUSG00000023030	Slc11a2	-0.318945	5.15997	6.20762e-05	0.000756052
ENSMUSG00000037499	Nenf	-0.318763	5.1754	0.000515669	0.0044283
ENSMUSG00000024911	Fibp	-0.318069	4.55495	0.00257744	0.0165353
ENSMUSG00000052331	Ankrd44	-0.317689	3.659	0.00308974	0.0190474
ENSMUSG00000044229	Nxpe4	-0.317043	3.70775	0.00182515	0.0124817
ENSMUSG00000046034	Otulin	-0.316336	4.08009	0.0015508	0.0109519
ENSMUSG00000021417	Eci2	-0.316263	4.53067	0.000466933	0.00409918
ENSMUSG00000022089	Bin3	-0.316045	3.54388	0.00993082	0.0477039
ENSMUSG00000058886	Deaf1	-0.31579	6.67887	0.000253329	0.00245127
ENSMUSG00000103770	Pcdha9	-0.315178	4.24133	0.00407003	0.023678
ENSMUSG00000074457	S100a16	-0.315011	5.96901	8.17968e-06	0.000128253
ENSMUSG00000037465	Klf10	-0.314533	4.99228	0.00274784	0.0174242
ENSMUSG00000027490	E2f1	-0.314194	3.52057	0.00405678	0.0236441
ENSMUSG00000032763	Ilvbl	-0.314191	3.51324	0.0033145	0.0201411
ENSMUSG00000017774	Myo1c	-0.313156	4.3718	0.00234619	0.01539
ENSMUSG00000090862	Rps13	-0.313008	6.65239	6.92125e-06	0.000110299
ENSMUSG00000042116	Vwa1	-0.312842	4.84547	0.00501541	0.0279211
ENSMUSG00000009621	Vav2	-0.310424	4.57473	0.00200073	0.0134773
ENSMUSG00000028884	Rpa2	-0.30992	3.23051	0.00959655	0.0464806
ENSMUSG00000032712	Resf1	-0.308851	3.52182	0.00533081	0.0293113
ENSMUSG00000051652	Lrrc3	-0.308837	4.84943	0.00019238	0.001975
ENSMUSG00000047084	Ngrn	-0.308623	4.98813	4.26518e-05	0.000545258
ENSMUSG00000099881	2810013P06Rik	-0.30858	3.74649	0.0047043	0.0264584
ENSMUSG00000000278	Scpep1	-0.308353	3.83649	0.00432568	0.0247672
ENSMUSG00000030199	Etv6	-0.308194	4.86043	8.84736e-05	0.0010201
ENSMUSG00000035242	Oaz1	-0.307081	6.89154	7.06233e-05	0.000845647
ENSMUSG00000022204	Ngdn	-0.306362	3.58711	0.00653299	0.0343492
ENSMUSG00000033632	AW554918	-0.306315	3.81386	0.00321784	0.0196709
ENSMUSG00000035215	Lsm7	-0.305553	5.21908	4.43603e-05	0.000563038
ENSMUSG00000061665	Cd2ap	-0.305363	4.6019	0.000608342	0.00505192
ENSMUSG00000024764	Naa40	-0.304599	4.99847	0.000105641	0.00118357
ENSMUSG00000022865	Cxadr	-0.304373	7.01606	0.000914245	0.00714826
ENSMUSG00000001642	Akr1b1	-0.304049	5.37262	9.47444e-05	0.0010818
ENSMUSG00000057411	Antkmt	-0.304025	4.55751	0.00983749	0.0474116
ENSMUSG00000046318	Ccbe1	-0.303899	3.58758	0.00781723	0.039524
ENSMUSG00000027940	Tpm3	-0.303708	7.62144	7.95423e-08	1.92684e-06
ENSMUSG00000022372	Sla	-0.303448	4.91466	0.000220303	0.00220102
ENSMUSG00000093674	Rpl41	-0.303273	8.57096	0.000259271	0.00250048
ENSMUSG00000025648	Pfkfb4	-0.303255	4.10028	0.00475172	0.0266736
ENSMUSG00000008668	Rps18	-0.303246	7.33453	4.55797e-06	7.6462e-05
ENSMUSG00000001289	Pfdn5	-0.302916	6.33322	2.17172e-06	3.88118e-05
ENSMUSG00000002395	Use1	-0.302759	4.92063	0.000648576	0.00532457
ENSMUSG00000039456	Morc3	-0.302672	4.63413	0.000196991	0.00201172
ENSMUSG00000015289	Lage3	-0.302227	3.76612	0.00266015	0.0169726
ENSMUSG00000025362	Rps26	-0.301917	7.73992	1.35221e-05	0.000200022
ENSMUSG00000026556	Vangl2	-0.301137	3.9682	0.0034713	0.0208922
ENSMUSG00000029119	Man2b2	-0.301039	4.46519	0.00303698	0.0188082
ENSMUSG00000086316	Nbdy	-0.300944	4.72965	0.00100461	0.00773054
ENSMUSG00000041841	Rpl37	-0.300366	6.83612	1.1669e-05	0.00017603
ENSMUSG00000003429	Rps11	-0.299764	7.19635	6.00437e-06	9.71909e-05
ENSMUSG00000021115	Vrk1	-0.299693	3.82188	0.00685283	0.0356347
ENSMUSG00000004451	Ralb	-0.299557	4.60072	0.000506789	0.00436377
ENSMUSG00000038112	AW551984	-0.299218	4.62825	0.00759513	0.038568
ENSMUSG00000001666	Ddt	-0.299104	3.87795	0.0101443	0.0485561
ENSMUSG00000074738	Fndc10	-0.298965	4.434	0.00411186	0.023854
ENSMUSG00000098274	Rpl24	-0.298542	7.26448	1.31247e-05	0.000195298
ENSMUSG00000061207	Stk19	-0.297288	4.22565	0.00275055	0.0174351
ENSMUSG00000093593	Gm20683	-0.296641	4.65009	0.000568564	0.00480358
ENSMUSG00000026975	Dph7	-0.296364	3.77518	0.00826282	0.0413472
ENSMUSG00000078453	Abracl	-0.296299	3.26812	0.00918016	0.0449738
ENSMUSG00000030083	Abtb1	-0.296008	4.62124	0.000658614	0.00539269
ENSMUSG00000030750	Nsmce1	-0.294637	3.55367	0.00704641	0.0364366
ENSMUSG00000029161	Cgref1	-0.294586	4.80059	0.00168865	0.0117408
ENSMUSG00000046364	Rpl27a	-0.294407	7.54737	4.80109e-05	0.000605537
ENSMUSG00000107068	Gm42742	-0.294288	4.87836	0.00252343	0.0162603
ENSMUSG00000042167	Tent2	-0.293808	4.35548	0.00144546	0.0103669
ENSMUSG00000058558	Rpl5	-0.293448	7.90339	4.78099e-07	9.96836e-06
ENSMUSG00000031399	Fam3a	-0.292792	4.02499	0.00231221	0.0151784
ENSMUSG00000059325	Hopx	-0.292602	4.39561	0.00250364	0.0161573
ENSMUSG00000007029	Vars1	-0.292484	4.92925	0.00021306	0.00214087
ENSMUSG00000030649	Anapc15	-0.292399	4.22963	0.00137803	0.00996431
ENSMUSG00000033099	Nol12	-0.291878	4.3619	0.0023622	0.015466
ENSMUSG00000053801	Grwd1	-0.291612	4.10769	0.00909324	0.0446604
ENSMUSG00000034485	Uaca	-0.291521	3.99246	0.00620664	0.0330404
ENSMUSG00000048826	Dact2	-0.291344	5.9734	0.00263828	0.0168515
ENSMUSG00000019432	Ddx39b	-0.290652	6.99176	6.43616e-06	0.000103321
ENSMUSG00000027018	Hat1	-0.29036	3.9828	0.00297034	0.0185266
ENSMUSG00000020097	Sgpl1	-0.290129	5.16873	0.000240207	0.00235027
ENSMUSG00000028063	Lmna	-0.290119	5.25892	0.000159493	0.00168478
ENSMUSG00000001518	Itfg2	-0.289857	3.70979	0.00430255	0.0246741
ENSMUSG00000034203	Chchd4	-0.289739	4.84878	0.000496278	0.00429862
ENSMUSG00000029752	Asns	-0.289688	6.42662	0.00191332	0.0129732
ENSMUSG00000037772	Mrpl23	-0.289426	4.57457	0.0015174	0.0107904
ENSMUSG00000117679	Apbb3	-0.28931	4.71848	0.000527201	0.0045019
ENSMUSG00000025722	Wdr73	-0.289016	4.25025	0.00245798	0.0159205
ENSMUSG00000020770	Unk	-0.288637	4.48427	0.00250468	0.0161573
ENSMUSG00000039463	Slc9a8	-0.288442	4.93526	0.00401335	0.0234691
ENSMUSG00000057863	Rpl36	-0.287878	6.57062	0.000342307	0.00314541
ENSMUSG00000095098	Ccdc85b	-0.287732	6.16509	3.93909e-05	0.000509522
ENSMUSG00000027953	Slc50a1	-0.287615	3.89097	0.00762092	0.0386846
ENSMUSG00000038500	Prr3	-0.287051	5.25443	0.000147946	0.00158867
ENSMUSG00000117924	Tmem223	-0.286669	4.81726	0.00240874	0.0156944
ENSMUSG00000028701	Lurap1	-0.286489	4.42551	0.00411737	0.023878
ENSMUSG00000039568	Ubald1	-0.286423	6.59674	5.44367e-06	8.902e-05
ENSMUSG00000006392	Med8	-0.285787	4.41723	0.00437542	0.0249694
ENSMUSG00000051817	Sox12	-0.285056	5.17429	0.00229425	0.0150775
ENSMUSG00000001962	Fam50a	-0.284703	4.51114	0.00176439	0.0121756
ENSMUSG00000008683	Rps15a	-0.2846	6.99636	4.56222e-06	7.6462e-05
ENSMUSG00000000740	Rpl13	-0.283654	8.15398	1.03583e-05	0.00015858
ENSMUSG00000021377	Dek	-0.283571	6.03037	1.15912e-05	0.000175007
ENSMUSG00000064145	Arih2	-0.282763	5.30825	0.000246141	0.00239182
ENSMUSG00000047907	Tshz2	-0.282213	6.20914	3.9794e-05	0.000513219
ENSMUSG00000034120	Srsf2	-0.28217	6.84531	1.07502e-05	0.000163578
ENSMUSG00000030697	Ppp4c	-0.282008	4.74605	0.00204411	0.0137115
ENSMUSG00000050896	Rtn4rl2	-0.281788	4.58115	0.00177236	0.0122161
ENSMUSG00000035585	Tsen34	-0.281504	5.51769	0.00104936	0.00799885
ENSMUSG00000022443	Myh9	-0.281277	6.50432	0.0102233	0.0488012
ENSMUSG00000071172	Srsf3	-0.280909	7.0732	1.54621e-05	0.000225481
ENSMUSG00000037997	Parp11	-0.280892	4.56814	0.000705527	0.00572743
ENSMUSG00000038884	Shfl	-0.28087	5.08186	0.000550956	0.00467738
ENSMUSG00000032609	Klhdc8b	-0.280566	4.42654	0.00614857	0.0328011
ENSMUSG00000024006	Stk38	-0.280476	4.98166	0.00031385	0.00293405
ENSMUSG00000042659	Arrdc4	-0.28018	4.15991	0.00676907	0.0353163
ENSMUSG00000016554	Eif3d	-0.280115	6.07722	2.77774e-05	0.000374945
ENSMUSG00000071655	Ubxn1	-0.279639	5.74993	3.24427e-05	0.000429156
ENSMUSG00000029647	Pan3	-0.279559	5.14952	0.00046011	0.0040474
ENSMUSG00000009035	Tmem184b	-0.279207	5.91689	8.59805e-05	0.000993969
ENSMUSG00000025232	Hexa	-0.279117	5.37203	0.000820176	0.00650569
ENSMUSG00000046402	Rbp1	-0.278166	3.79768	0.00675343	0.0352763
ENSMUSG00000028995	Hycc1	-0.277694	5.01382	0.00102291	0.00783692
ENSMUSG00000024457	Trim26	-0.277611	4.43422	0.00294718	0.0184149
ENSMUSG00000022048	Dpysl2	-0.277469	7.84256	2.51419e-05	0.000343744
ENSMUSG00000002274	Metrn	-0.277468	5.52811	7.23371e-05	0.000863607
ENSMUSG00000039001	Rps21	-0.277433	7.12167	7.7089e-05	0.000910409
ENSMUSG00000042185	Nfrkb	-0.277382	4.83238	0.000741631	0.00597742
ENSMUSG00000045817	Zfp36l2	-0.277239	4.71661	0.00644291	0.0339576
ENSMUSG00000022466	Rpap3	-0.277232	4.50753	0.00386298	0.0227722
ENSMUSG00000041313	Slc7a1	-0.277174	6.01298	0.00839594	0.0418936
ENSMUSG00000031360	Ctps2	-0.27697	4.54577	0.00243026	0.0157936
ENSMUSG00000026641	Usf1	-0.276195	5.59314	5.40087e-05	0.000666132
ENSMUSG00000023942	Slc29a1	-0.275683	3.91741	0.00591473	0.0318497
ENSMUSG00000015126	Tsr3	-0.275634	4.13999	0.00273728	0.0173636
ENSMUSG00000008682	Rpl10	-0.275286	7.85017	3.18113e-05	0.000423039
ENSMUSG00000027951	Adar	-0.275231	7.40222	1.57512e-05	0.000228936
ENSMUSG00000030103	Bhlhe40	-0.274852	6.17704	0.000279837	0.00266073
ENSMUSG00000027422	Rrbp1	-0.274608	6.19477	0.00250891	0.0161786
ENSMUSG00000018293	Pfn1	-0.274398	6.44034	2.48607e-05	0.000340697
ENSMUSG00000017493	Igfbp4	-0.274203	6.77068	1.62542e-05	0.00023528
ENSMUSG00000048755	Mcat	-0.274001	4.19675	0.00426989	0.0245592
ENSMUSG00000028936	Rpl22	-0.273547	6.81247	3.69794e-05	0.000483687
ENSMUSG00000023092	Fhl1	-0.273218	6.84114	2.62382e-06	4.60458e-05
ENSMUSG00000017764	Zswim1	-0.273003	4.3223	0.00356847	0.0213742
ENSMUSG00000024258	Polr2d	-0.271958	4.52596	0.00135883	0.0098504
ENSMUSG00000042712	Tceal9	-0.271871	5.88499	1.03034e-05	0.000157877
ENSMUSG00000046330	Rpl37a	-0.271752	6.8986	3.96772e-05	0.000512468
ENSMUSG00000009739	Pou6f1	-0.271524	6.80882	2.49748e-05	0.000341761
ENSMUSG00000019338	Zfp687	-0.271015	4.61632	0.00087558	0.00687837
ENSMUSG00000053332	Gas5	-0.270868	5.47737	0.000255677	0.00246854
ENSMUSG00000029538	Srsf9	-0.270623	4.60931	0.00226078	0.0149175
ENSMUSG00000044533	Rps2	-0.270376	8.78927	4.8024e-05	0.000605537
ENSMUSG00000009927	Rps25	-0.270284	7.51161	2.89019e-05	0.000387884
ENSMUSG00000029404	Arl6ip4	-0.27022	5.11591	0.00163812	0.0114577
ENSMUSG00000020572	Nampt	-0.269876	6.1838	6.12519e-05	0.000748093
ENSMUSG00000034686	Prr7	-0.269807	5.36364	0.00518452	0.0286713
ENSMUSG00000021326	Trim27	-0.26973	4.51931	0.00695512	0.0361124
ENSMUSG00000016534	Lamp2	-0.269678	6.06106	5.29406e-05	0.000656193
ENSMUSG00000029469	Ift81	-0.26967	4.75792	0.00136583	0.00989707
ENSMUSG00000031665	Sall1	-0.269349	4.60042	0.00235077	0.0154084
ENSMUSG00000060950	Trmt61a	-0.268827	3.73557	0.0096636	0.0466763
ENSMUSG00000039715	Dync2i2	-0.268497	4.50965	0.00386466	0.0227744
ENSMUSG00000057841	Rpl32	-0.268389	7.33202	8.55879e-05	0.00099205
ENSMUSG00000030663	1110004F10Rik	-0.268385	6.6532	0.000321729	0.00299403
ENSMUSG00000063446	Plppr1	-0.26798	4.96581	0.00581092	0.0313629
ENSMUSG00000033294	Noc4l	-0.267926	4.57692	0.00250279	0.0161573
ENSMUSG00000029777	Gars1	-0.267522	6.94266	0.000262285	0.00252261
ENSMUSG00000041354	Rgl2	-0.26748	5.30482	0.000271033	0.00258544
ENSMUSG00000026020	Nop58	-0.267269	5.46573	0.00156268	0.0110225
ENSMUSG00000021493	Pdlim7	-0.267268	5.07829	0.000500126	0.00432126
ENSMUSG00000034796	Cpne7	-0.266615	6.19333	4.74151e-05	0.000598722
ENSMUSG00000004100	Ppan	-0.266527	3.86723	0.00725354	0.0372766
ENSMUSG00000022559	Fbxl6	-0.266016	4.16209	0.007315	0.0374997
ENSMUSG00000027937	Jtb	-0.265837	4.70357	0.00650036	0.0341986
ENSMUSG00000055692	Tmem191	-0.265787	5.25409	0.000765597	0.00614231
ENSMUSG00000030757	Zkscan2	-0.265767	4.76973	0.00102988	0.00787309
ENSMUSG00000025508	Rplp2	-0.265615	6.62289	0.000398462	0.00357866
ENSMUSG00000005682	Pan2	-0.264781	4.23997	0.00296195	0.0184808
ENSMUSG00000020387	Jade2	-0.264732	4.61044	0.00433876	0.0247936
ENSMUSG00000027009	Itga4	-0.264672	4.32186	0.00701186	0.0363116
ENSMUSG00000063856	Gpx1	-0.263764	6.07668	0.000227549	0.00225924
ENSMUSG00000004610	Etfb	-0.263374	4.48434	0.00350888	0.0210966
ENSMUSG00000020868	Xylt2	-0.263197	4.84628	0.0018268	0.0124881
ENSMUSG00000041453	Rpl21	-0.262551	8.33241	6.13577e-05	0.000748864
ENSMUSG00000022193	Psmb5	-0.262245	6.23604	0.00016279	0.00171547
ENSMUSG00000024217	Snrpc	-0.262048	4.95117	0.000594508	0.00496994
ENSMUSG00000038593	Tctn1	-0.261885	4.13511	0.00438137	0.0249789
ENSMUSG00000054013	Tmem179	-0.261752	7.0751	1.11263e-05	0.000168594
ENSMUSG00000038607	Gng10	-0.261673	5.64463	0.000306419	0.00288218
ENSMUSG00000037894	H2az1	-0.261484	6.98904	0.00020218	0.00205037
ENSMUSG00000029328	Hnrnpdl	-0.261434	7.22694	3.13637e-05	0.000418039
ENSMUSG00000075227	Znhit2	-0.261365	4.56194	0.00967557	0.0467212
ENSMUSG00000028843	Sh3bgrl3	-0.261346	6.40881	0.00111079	0.00837465
ENSMUSG00000051062	Fbll1	-0.26068	5.32107	0.00149047	0.0106331
ENSMUSG00000034220	Gpc1	-0.260536	6.38472	2.88899e-05	0.000387884
ENSMUSG00000020790	Ankfy1	-0.260483	5.91277	3.70815e-05	0.0004843
ENSMUSG00000021807	Rtraf	-0.259786	5.92471	0.000310544	0.00290693
ENSMUSG00000036620	Mgat4b	-0.259212	6.29313	0.00121814	0.00904388
ENSMUSG00000025967	Eef1b2	-0.259197	6.9987	1.56405e-05	0.000227893
ENSMUSG00000027667	Zfp639	-0.259197	4.5461	0.0019386	0.0131243
ENSMUSG00000019961	Tmpo	-0.259122	4.89191	0.00147832	0.0105679
ENSMUSG00000052146	Rps10	-0.258414	7.02987	5.19514e-05	0.000646219
ENSMUSG00000041096	Tspyl2	-0.258157	6.26002	0.000535067	0.00455796
ENSMUSG00000031584	Gsr	-0.257805	4.93182	0.00130025	0.00951235
ENSMUSG00000109324	Prmt1	-0.257575	5.95409	0.000290119	0.00274805
ENSMUSG00000073481	Mtarc2	-0.257225	5.18236	0.000489968	0.00426294
ENSMUSG00000033307	Mif	-0.256029	7.15654	0.000502076	0.00432744
ENSMUSG00000021731	Mrps30	-0.255818	4.3534	0.00323555	0.0197654
ENSMUSG00000030726	Pold3	-0.255765	4.50566	0.00446423	0.0253852
ENSMUSG00000008206	Cers4	-0.255444	5.7709	0.000476343	0.00416996
ENSMUSG00000035835	Plppr3	-0.2554	6.07575	0.00050162	0.00432564
ENSMUSG00000032383	Ppib	-0.255347	6.6605	0.000173398	0.00181091
ENSMUSG00000024981	Acsl5	-0.255267	5.85628	0.000238959	0.00234406
ENSMUSG00000005779	Psmb4	-0.255236	6.50652	0.0001332	0.00145079
ENSMUSG00000038252	Ncapd2	-0.254806	4.64985	0.00494475	0.0275891
ENSMUSG00000040653	Ppp1r14c	-0.254597	5.70306	0.000766998	0.00615073
ENSMUSG00000036733	Rbm42	-0.254472	5.82032	9.47515e-05	0.0010818
ENSMUSG00000024019	Cmtr1	-0.254189	6.5951	2.81666e-05	0.000379761
ENSMUSG00000028923	Necap2	-0.253965	4.82259	0.00371776	0.0221322
ENSMUSG00000017721	Pigt	-0.253912	6.51776	0.000153768	0.00163988
ENSMUSG00000062997	Rpl35	-0.253714	7.55722	8.19224e-05	0.000958443
ENSMUSG00000020857	Nme2	-0.253616	6.22883	0.000947583	0.00736004
ENSMUSG00000041560	Nop53	-0.253509	5.96475	0.000318713	0.00297386
ENSMUSG00000039231	Suv39h1	-0.253421	5.09423	0.00212574	0.0141613
ENSMUSG00000030432	Rpl28	-0.253298	7.46944	0.000366978	0.00332861
ENSMUSG00000042750	Bex2	-0.252754	7.81761	7.09982e-05	0.00084878
ENSMUSG00000028669	Pithd1	-0.252716	5.89836	0.000700601	0.00569125
ENSMUSG00000036430	Tbcc	-0.25235	4.07102	0.0091543	0.0448722
ENSMUSG00000052253	Zfp622	-0.251099	5.12229	0.000755134	0.00607228
ENSMUSG00000042035	Igsf3	-0.251019	5.11785	0.0011523	0.0086319
ENSMUSG00000027203	Dut	-0.250637	4.47112	0.0061001	0.032632
ENSMUSG00000002210	Smg9	-0.250308	4.65085	0.00209276	0.0139952
ENSMUSG00000034807	Colgalt1	-0.250022	5.97887	0.000266305	0.00255145
ENSMUSG00000025743	Sdc3	-0.249836	8.75373	0.000199373	0.00203013
ENSMUSG00000005566	Trim28	-0.249775	6.79335	1.0436e-05	0.00015949
ENSMUSG00000032399	Rpl4	-0.249761	8.75025	5.18724e-06	8.53846e-05
ENSMUSG00000040649	Rimklb	-0.249739	5.71672	0.000314741	0.00293993
ENSMUSG00000030652	Coq7	-0.248894	4.49897	0.0067817	0.0353601
ENSMUSG00000078974	Sec61g	-0.248832	5.31574	0.000611017	0.00507173
ENSMUSG00000017404	Rpl19	-0.24882	8.12946	3.15177e-05	0.000419453
ENSMUSG00000071662	Polr2g	-0.248683	5.38731	0.000312338	0.00292216
ENSMUSG00000032698	Lmo2	-0.248199	4.05624	0.0096633	0.0466763
ENSMUSG00000020167	Tcf3	-0.248108	4.54388	0.00241323	0.0156966
ENSMUSG00000036281	Snapc4	-0.24783	5.07734	0.00188497	0.0128116
ENSMUSG00000022453	Naga	-0.247809	4.14972	0.00927477	0.0453232
ENSMUSG00000063316	Rpl27	-0.247321	6.86716	0.000201349	0.00204786
ENSMUSG00000033938	Ndufb7	-0.24652	5.69528	0.000310084	0.00290418
ENSMUSG00000035824	Tk2	-0.245793	5.06364	0.00668759	0.0350315
ENSMUSG00000027342	Pcna	-0.245791	5.37355	0.00155793	0.0109934
ENSMUSG00000071076	Jund	-0.245779	6.89405	0.00180554	0.0123815
ENSMUSG00000090733	Rps27	-0.245649	7.27912	0.00177618	0.0122283
ENSMUSG00000041936	Agrn	-0.244637	7.7456	7.48749e-05	0.000887853
ENSMUSG00000020538	Srebf1	-0.244339	4.59195	0.00540991	0.0296184
ENSMUSG00000029778	Adcyap1r1	-0.243766	7.56433	1.32183e-05	0.000196357
ENSMUSG00000060636	Rpl35a	-0.243563	6.50288	6.98224e-05	0.000837582
ENSMUSG00000060992	Copz1	-0.243449	6.59655	0.000256848	0.00247847
ENSMUSG00000032012	Nectin1	-0.243333	5.93248	0.000636255	0.00524888
ENSMUSG00000021134	Srsf5	-0.242586	7.6085	0.000247551	0.00240333
ENSMUSG00000028673	Fuca1	-0.242268	4.86315	0.00450153	0.0255227
ENSMUSG00000046613	Vwa5b2	-0.242181	5.28422	0.000866166	0.00681187
ENSMUSG00000020955	Ap4s1	-0.242052	4.86114	0.00741281	0.0378507
ENSMUSG00000002803	Btbd6	-0.241665	5.32649	0.000737963	0.00595333
ENSMUSG00000021811	Dnajc9	-0.241416	4.45423	0.00520581	0.0287799
ENSMUSG00000060036	Rpl3	-0.241369	8.68175	9.62872e-05	0.00109647
ENSMUSG00000079435	Rpl36a	-0.24132	6.32923	0.00119299	0.00888354
ENSMUSG00000049932	H2ax	-0.240604	5.39422	0.00160079	0.0112415
ENSMUSG00000023089	Ndufa5	-0.240499	6.07809	0.000360023	0.00327385
ENSMUSG00000007836	Hnrnpa0	-0.239896	7.35274	7.40363e-05	0.000880293
ENSMUSG00000030029	Lrig1	-0.239117	5.132	0.00163563	0.0114449
ENSMUSG00000038126	Mphosph9	-0.238881	4.61729	0.005983	0.0321628
ENSMUSG00000029348	Asphd2	-0.238814	6.40816	0.00154483	0.0109406
ENSMUSG00000024937	Ehbp1l1	-0.238742	5.35054	0.00556851	0.0303728
ENSMUSG00000032997	Chpf	-0.238575	6.18359	0.00140596	0.0101375
ENSMUSG00000079426	Arpc4	-0.238265	6.90732	0.000496147	0.00429862
ENSMUSG00000037570	Mcrs1	-0.238093	6.2057	0.000827464	0.00655459
ENSMUSG00000044496	2510039O18Rik	-0.238	4.73321	0.00379721	0.0224679
ENSMUSG00000050628	Ubald2	-0.237693	4.98366	0.0018098	0.012401
ENSMUSG00000028857	Tmem222	-0.237534	5.99103	0.000336797	0.00310947
ENSMUSG00000060938	Rpl26	-0.237187	7.66348	0.000211377	0.0021264
ENSMUSG00000030967	Zranb1	-0.23703	6.16363	0.00531454	0.0292425
ENSMUSG00000109511	Nup62	-0.236754	5.14349	0.00250236	0.0161573
ENSMUSG00000046711	Hmga1	-0.236681	5.98743	0.000102923	0.00115847
ENSMUSG00000026755	Arpc5l	-0.236658	6.1888	0.000230961	0.00228758
ENSMUSG00000025227	Mfsd13a	-0.236595	4.69151	0.00352197	0.0211608
ENSMUSG00000034707	Gns	-0.236496	6.67221	6.85634e-05	0.000824738
ENSMUSG00000026234	Ncl	-0.234534	8.13786	3.93579e-05	0.00050947
ENSMUSG00000005672	Kit	-0.234365	5.75418	0.000690672	0.00562363
ENSMUSG00000040502	Marchf9	-0.233384	5.10872	0.00696436	0.0361124
ENSMUSG00000024404	Riok3	-0.232869	6.11031	0.00244209	0.015841
ENSMUSG00000044857	Lemd2	-0.232603	4.90957	0.00179373	0.0123343
ENSMUSG00000031930	Wwp2	-0.232569	4.96853	0.00166487	0.0116031
ENSMUSG00000022300	Dcaf13	-0.232448	4.18748	0.00964949	0.0466596
ENSMUSG00000059187	Tafa1	-0.232035	5.63553	0.00089697	0.00702887
ENSMUSG00000005687	Bcas2	-0.231371	5.27101	0.00342088	0.0206455
ENSMUSG00000056306	Sertm1	-0.231345	5.47277	0.00236379	0.0154707
ENSMUSG00000049300	Prmt6	-0.228847	4.45664	0.0102211	0.0488012
ENSMUSG00000032410	Xrn1	-0.228753	5.28596	0.00211525	0.0140968
ENSMUSG00000029311	Hsd17b11	-0.228526	4.92312	0.0027987	0.0176891
ENSMUSG00000052681	Rap1b	-0.228346	6.51277	0.000233269	0.00230038
ENSMUSG00000030805	Stx4a	-0.227984	4.66699	0.00984723	0.0474455
ENSMUSG00000009640	Dmap1	-0.226869	4.42346	0.010263	0.0489505
ENSMUSG00000049517	Rps23	-0.226637	7.48864	0.000698884	0.00567993
ENSMUSG00000049751	Rpl36al	-0.226574	5.9315	0.00706713	0.0365114
ENSMUSG00000025374	Nabp2	-0.225879	5.66975	0.00731371	0.0374997
ENSMUSG00000071415	Rpl23	-0.225614	7.47333	0.0002373	0.00233226
ENSMUSG00000004677	Myo9b	-0.225433	5.6546	0.00317854	0.0194783
ENSMUSG00000066551	Hmgb1	-0.225324	8.17893	0.000253815	0.00245327
ENSMUSG00000037376	Trmt6	-0.225222	4.61129	0.0091386	0.0448203
ENSMUSG00000015757	Ppil4	-0.225081	5.66673	0.00315592	0.0193667
ENSMUSG00000026434	Nucks1	-0.224763	7.38077	0.000683396	0.00557216
ENSMUSG00000067924	Rtl8b	-0.22439	7.38756	0.000864931	0.00680521
ENSMUSG00000028367	Txn1	-0.224328	5.89242	0.00945996	0.0459844
ENSMUSG00000030057	Cnbp	-0.224022	8.00633	0.00209281	0.0139952
ENSMUSG00000047557	Lxn	-0.223851	5.11612	0.00333124	0.020209
ENSMUSG00000063457	Rps15	-0.223228	7.9134	0.000743649	0.00599092
ENSMUSG00000031728	Zfp821	-0.222949	5.44985	0.00281373	0.0177713
ENSMUSG00000039057	Myo16	-0.2228	6.05874	0.00413995	0.0239614
ENSMUSG00000034892	Rps29	-0.222607	7.02937	0.000830315	0.00656827
ENSMUSG00000042834	Nrep	-0.222594	7.99859	0.00780622	0.0394911
ENSMUSG00000026305	Lrrfip1	-0.222475	5.82734	0.000573989	0.00483629
ENSMUSG00000021131	Erh	-0.221876	6.00243	0.00246978	0.015991
ENSMUSG00000118668	Rps6ka4	-0.221045	4.8002	0.00871593	0.0431827
ENSMUSG00000047945	Marcksl1	-0.220564	8.90321	0.00255677	0.0164256
ENSMUSG00000027472	Pdrg1	-0.220514	4.92159	0.0092457	0.0452316
ENSMUSG00000002799	Jag2	-0.219622	4.97969	0.0063862	0.0337494
ENSMUSG00000046215	Rprml	-0.219163	5.77147	0.00564181	0.0306961
ENSMUSG00000079018	Ly6c1	-0.21888	4.90693	0.00848172	0.0422218
ENSMUSG00000017664	Slc35c2	-0.21886	5.40681	0.001296	0.00948521
ENSMUSG00000031885	Cbfb	-0.218603	4.79441	0.008852	0.0436838
ENSMUSG00000032897	Nfyc	-0.21853	5.35661	0.00299917	0.0186731
ENSMUSG00000004667	Polr2e	-0.21806	5.32047	0.00290701	0.0182093
ENSMUSG00000039382	Wdr45	-0.217757	4.52918	0.00914662	0.0448471
ENSMUSG00000005899	Smpd4	-0.217346	5.43182	0.00362811	0.021687
ENSMUSG00000041362	Shtn1	-0.217282	5.96989	0.000880415	0.00691151
ENSMUSG00000033578	Tmem35a	-0.217275	6.29447	0.000423276	0.00376549
ENSMUSG00000018761	Mpdu1	-0.217224	5.26879	0.00976475	0.047087
ENSMUSG00000018858	Mrpl58	-0.216474	5.046	0.00517212	0.0286298
ENSMUSG00000028029	Aimp1	-0.216436	5.16501	0.00676667	0.0353163
ENSMUSG00000031729	Ist1	-0.216434	6.19483	0.00166004	0.0115787
ENSMUSG00000029121	Crmp1	-0.215975	8.48467	0.00181793	0.0124421
ENSMUSG00000031681	Smad1	-0.215214	4.90385	0.00634326	0.0335738
ENSMUSG00000000489	Pdgfb	-0.214732	5.11776	0.00658933	0.034594
ENSMUSG00000027581	Stmn3	-0.214133	9.10512	0.00279496	0.0176782
ENSMUSG00000025858	Get4	-0.21336	5.59156	0.00172336	0.0119404
ENSMUSG00000021218	Gdi2	-0.212631	7.89996	0.000262573	0.00252261
ENSMUSG00000027642	Rpn2	-0.21219	6.6957	0.000294782	0.00278319
ENSMUSG00000040459	Arglu1	-0.212089	6.02865	0.00566646	0.0307729
ENSMUSG00000018042	Cyb5r3	-0.211535	6.02287	0.00298141	0.0185823
ENSMUSG00000024045	Akap8	-0.211257	6.09849	0.00105212	0.00800124
ENSMUSG00000025158	Rfng	-0.21065	6.21852	0.00110076	0.00831951
ENSMUSG00000051495	Irf2bp2	-0.210629	5.29781	0.00505186	0.0281062
ENSMUSG00000015750	Aph1a	-0.210549	5.65393	0.00168013	0.0116882
ENSMUSG00000020918	Kat2a	-0.210313	6.2868	0.00132558	0.00966535
ENSMUSG00000026458	Ppfia4	-0.210146	6.63229	0.00283025	0.0178376
ENSMUSG00000029616	Erp29	-0.209876	6.47621	0.00365392	0.0218189
ENSMUSG00000039278	Pcsk1n	-0.209767	8.19414	0.00645441	0.0339978
ENSMUSG00000066357	Wdr6	-0.209628	8.08895	0.00301224	0.0187079
ENSMUSG00000026269	Rnpepl1	-0.209537	5.06543	0.00661771	0.0347222
ENSMUSG00000000339	Rtca	-0.209502	5.56791	0.00372667	0.0221777
ENSMUSG00000079003	Samd1	-0.209024	5.1142	0.00384399	0.0226831
ENSMUSG00000057561	Eif1a	-0.209019	5.53832	0.00173379	0.0120022
ENSMUSG00000022338	Eny2	-0.208854	5.70672	0.00912854	0.0447835
ENSMUSG00000020811	Wscd1	-0.208503	5.77213	0.00105101	0.00800124
ENSMUSG00000020180	Snrpd3	-0.208222	5.9882	0.00129433	0.00948095
ENSMUSG00000090137	Uba52	-0.20805	8.26307	0.00104376	0.00796877
ENSMUSG00000032412	Atp1b3	-0.207839	6.46093	0.000708007	0.0057381
ENSMUSG00000025474	Tubgcp2	-0.207735	5.11604	0.00735286	0.0375885
ENSMUSG00000024101	Washc1	-0.207624	4.8622	0.0104695	0.0497186
ENSMUSG00000032215	Rsl24d1	-0.206928	5.33169	0.00282347	0.0178135
ENSMUSG00000006356	Crip2	-0.206591	6.85702	0.00888452	0.0438054
ENSMUSG00000031029	Eif3f	-0.206316	6.60059	0.00342686	0.0206674
ENSMUSG00000062761	Zfp512	-0.205683	5.58178	0.00170622	0.0118441
ENSMUSG00000044783	Hjurp	-0.205213	5.36289	0.00475547	0.0266861
ENSMUSG00000029580	Actb	-0.204872	9.97127	0.000561418	0.00475009
ENSMUSG00000062647	Rpl7a	-0.204468	7.94211	0.000422143	0.00376447
ENSMUSG00000037300	Ttc13	-0.20404	5.38016	0.00466024	0.026278
ENSMUSG00000029780	Nt5c3	-0.203754	5.45002	0.0054274	0.0296956
ENSMUSG00000044912	Syt16	-0.203738	7.05711	0.00209466	0.0139969
ENSMUSG00000022677	Cep20	-0.203505	5.09709	0.00950488	0.0461259
ENSMUSG00000040867	Begain	-0.203474	7.29487	0.000594735	0.00496994
ENSMUSG00000048758	Rpl29	-0.203457	7.94383	0.00117657	0.0087799
ENSMUSG00000027423	Snx5	-0.203036	6.28235	0.000990003	0.00764502
ENSMUSG00000024160	Spsb3	-0.203027	5.41114	0.00528587	0.0291397
ENSMUSG00000038351	Sgsm2	-0.202531	6.65585	0.000525767	0.00449261
ENSMUSG00000061787	Rps17	-0.202481	6.93244	0.00124031	0.00918121
ENSMUSG00000027533	Fabp5	-0.202027	7.19846	0.00289201	0.0181349
ENSMUSG00000028466	Creb3	-0.201764	5.12377	0.00707902	0.036562
ENSMUSG00000022858	Tra2b	-0.201728	6.29953	0.0022145	0.0146727
ENSMUSG00000020840	Blmh	-0.201692	6.14357	0.000805383	0.00640866
ENSMUSG00000015804	Med28	-0.201421	5.45295	0.00426183	0.024529
ENSMUSG00000029472	Anapc5	-0.200645	7.50988	0.00226139	0.0149175
ENSMUSG00000004937	Sgta	-0.200523	7.20453	0.00137701	0.00996431
ENSMUSG00000029836	Cbx3	-0.200067	7.37649	0.000790554	0.00631074
ENSMUSG00000028639	Ybx1	-0.19997	8.08434	0.00211032	0.0140743
ENSMUSG00000000902	Smarcb1	-0.199805	5.961	0.00540809	0.0296177
ENSMUSG00000067786	Nnat	-0.199201	8.32177	0.00398418	0.0233297
ENSMUSG00000014601	Strip1	-0.198379	6.20721	0.00237261	0.0155108
ENSMUSG00000029649	Pomp	-0.198092	6.38695	0.00145689	0.0104403
ENSMUSG00000032295	Man2c1	-0.19797	5.23347	0.00907208	0.0445691
ENSMUSG00000022043	Trim35	-0.197735	7.61383	0.000993534	0.00766891
ENSMUSG00000028691	Prdx1	-0.197246	7.14353	0.000530816	0.00452615
ENSMUSG00000020263	Appl2	-0.197165	5.35828	0.00518454	0.0286713
ENSMUSG00000049866	Arl4c	-0.196963	6.20224	0.00408515	0.0237462
ENSMUSG00000031862	Atp13a1	-0.195948	5.79182	0.00220903	0.0146438
ENSMUSG00000037428	Vgf	-0.19549	8.27861	0.00027336	0.00260339
ENSMUSG00000020457	Drg1	-0.194834	6.01531	0.00388043	0.0228443
ENSMUSG00000040945	Rcc2	-0.194604	6.49393	0.000957508	0.00742355
ENSMUSG00000020723	Cacng4	-0.194511	6.3591	0.00177193	0.0122161
ENSMUSG00000028693	Nasp	-0.194466	5.20972	0.0100927	0.0483355
ENSMUSG00000016921	Srsf6	-0.194017	7.13409	0.000771861	0.00618124
ENSMUSG00000046841	Ckap4	-0.193255	5.17739	0.00879605	0.0434812
ENSMUSG00000074656	Eif2s2	-0.192545	6.55467	0.00433375	0.0247856
ENSMUSG00000029713	Gnb2	-0.192372	8.50279	0.00302181	0.018754
ENSMUSG00000038991	Txndc5	-0.191793	5.81125	0.00644181	0.0339576
ENSMUSG00000028670	Lypla2	-0.191527	5.74707	0.00848341	0.0422218
ENSMUSG00000036699	Zcchc12	-0.189946	6.56226	0.00134616	0.00976663
ENSMUSG00000052752	Traf7	-0.189405	5.30892	0.00881137	0.0435324
ENSMUSG00000021660	Btf3	-0.189057	6.73358	0.00752962	0.0382909
ENSMUSG00000006675	P4htm	-0.188589	5.65707	0.00728401	0.0374002
ENSMUSG00000055003	Lrtm2	-0.188341	5.49	0.00589923	0.0317905
ENSMUSG00000034674	Tdg	-0.18816	6.38625	0.00302734	0.0187751
ENSMUSG00000035640	Cbarp	-0.187871	8.18903	0.00237346	0.0155108
ENSMUSG00000044349	Snhg11	-0.187145	10.2318	0.00199955	0.0134745
ENSMUSG00000024608	Rps14	-0.186585	7.90429	0.00223354	0.0147728
ENSMUSG00000042548	Asxl1	-0.186436	5.94317	0.00352724	0.0211763
ENSMUSG00000040843	Tiprl	-0.186395	5.44206	0.00570571	0.0309284
ENSMUSG00000063229	Ldha	-0.186252	8.61356	0.00100798	0.00774779
ENSMUSG00000075012	Fjx1	-0.186182	6.43576	0.00196667	0.0132784
ENSMUSG00000028041	Adam15	-0.18562	6.12046	0.0023536	0.0154212
ENSMUSG00000017760	Ctsa	-0.185264	6.53129	0.00283411	0.0178485
ENSMUSG00000037916	Ndufv1	-0.184767	6.69243	0.00631075	0.0334523
ENSMUSG00000040681	Hmgn1	-0.183029	5.62845	0.00632837	0.0335153
ENSMUSG00000055629	B4galnt4	-0.182276	6.4499	0.00345585	0.020807
ENSMUSG00000036299	BC031181	-0.182246	6.73144	0.00433896	0.0247936
ENSMUSG00000027366	Sppl2a	-0.181539	5.7599	0.00995079	0.0477736
ENSMUSG00000059248	Septin9	-0.181402	6.19953	0.0031315	0.0192574
ENSMUSG00000025487	Psmd13	-0.181162	6.18938	0.00441168	0.0251272
ENSMUSG00000017132	Cyth1	-0.180591	6.12547	0.00420458	0.0242633
ENSMUSG00000040669	Phc1	-0.180451	5.61697	0.00616315	0.0328489
ENSMUSG00000021268	Meg3	-0.179982	11.5876	0.0072467	0.0372633
ENSMUSG00000033499	Larp4b	-0.179815	6.78884	0.00360098	0.0215468
ENSMUSG00000037742	Eef1a1	-0.179406	10.9639	0.00111313	0.00838871
ENSMUSG00000002957	Ap2a2	-0.179092	7.95859	0.00271857	0.0172636
ENSMUSG00000060126	Tpt1	-0.178822	8.8975	0.00152807	0.0108527
ENSMUSG00000004056	Akt2	-0.178452	6.78096	0.00375936	0.0222965
ENSMUSG00000022661	Cd200	-0.177928	7.06149	0.00160562	0.0112709
ENSMUSG00000023010	Tmbim6	-0.177114	8.16638	0.000964886	0.00747744
ENSMUSG00000027433	Xrn2	-0.176912	5.76275	0.00703776	0.0364129
ENSMUSG00000027405	Nop56	-0.175919	6.24711	0.00447007	0.0253937
ENSMUSG00000063659	Zbtb18	-0.175886	8.53414	0.00375819	0.0222965
ENSMUSG00000018770	Atp5mc3	-0.1758	7.50856	0.00622993	0.0331443
ENSMUSG00000050565	Tor1aip2	-0.17524	6.06594	0.00684112	0.0355852
ENSMUSG00000058569	Tmed9	-0.175152	6.20903	0.00566858	0.0307748
ENSMUSG00000028954	Nub1	-0.174498	6.6909	0.00313848	0.0192868
ENSMUSG00000028692	Akr1a1	-0.174426	8.2608	0.00610566	0.0326486
ENSMUSG00000029878	Dbpht2	-0.174407	6.93312	0.00906601	0.0445691
ENSMUSG00000026110	Mgat4a	-0.174383	5.35523	0.0102382	0.0488589
ENSMUSG00000073702	Rpl31	-0.173822	7.70776	0.00570228	0.0309194
ENSMUSG00000024767	Otub1	-0.173584	7.57625	0.00175821	0.0121425
ENSMUSG00000001783	Rtcb	-0.173229	6.47908	0.00471111	0.0264881
ENSMUSG00000075590	Nrbp2	-0.172554	6.89268	0.00533374	0.0293113
ENSMUSG00000047181	Samd14	-0.172499	6.26589	0.00577359	0.0311902
ENSMUSG00000041645	Ddx24	-0.172345	7.3789	0.00326653	0.019913
ENSMUSG00000030213	Atf7ip	-0.171104	6.30287	0.0076225	0.0386846
ENSMUSG00000008475	Arpc5	-0.170481	7.30781	0.0105318	0.0499335
ENSMUSG00000062421	Arf2	-0.168847	6.18201	0.00733616	0.0375314
ENSMUSG00000027255	Arfgap2	-0.168227	6.03291	0.00828333	0.0414379
ENSMUSG00000020088	Sar1a	-0.168055	7.07552	0.00472396	0.0265433
ENSMUSG00000004530	Coro1c	-0.167206	6.87102	0.00375353	0.0222845
ENSMUSG00000009555	Cdk9	-0.166346	6.05121	0.00711552	0.0367289
ENSMUSG00000026238	Ptma	-0.166021	8.46256	0.00607737	0.0325502
ENSMUSG00000028826	Maco1	-0.164573	6.16422	0.009984	0.0479068
ENSMUSG00000029775	Klhdc10	-0.16385	7.44082	0.00388319	0.0228452
ENSMUSG00000061477	Rps7	-0.163338	7.98844	0.00771271	0.0390858
ENSMUSG00000024359	Hspa9	-0.163152	7.61002	0.0074253	0.0378924
ENSMUSG00000060803	Gstp1	-0.16297	6.12616	0.00785517	0.03967
ENSMUSG00000027808	Serp1	-0.161757	6.26854	0.00729334	0.0374372
ENSMUSG00000040731	Eif4h	-0.160771	8.27808	0.00319182	0.0195323
ENSMUSG00000068739	Sars1	-0.159899	7.23182	0.00806601	0.040571
ENSMUSG00000014867	Surf4	-0.159872	6.33767	0.00837328	0.0418095
ENSMUSG00000029426	Scarb2	-0.159593	6.98065	0.00428535	0.0246239
ENSMUSG00000030744	Rps3	-0.15851	7.7945	0.00610694	0.0326486
ENSMUSG00000032612	Usp4	-0.15832	6.50822	0.00663281	0.0347805
ENSMUSG00000042078	Svop	-0.158129	7.61714	0.00813394	0.0408234
ENSMUSG00000010095	Slc3a2	-0.15678	7.04399	0.0095501	0.046294
ENSMUSG00000028790	Khdrbs1	-0.155755	6.93616	0.00966138	0.0466763
ENSMUSG00000020923	Ubtf	-0.155691	7.16484	0.00540183	0.0296019
ENSMUSG00000016541	Atxn10	-0.154471	7.9367	0.00759304	0.038568
ENSMUSG00000054766	Set	-0.154091	7.56766	0.0062881	0.0333726
ENSMUSG00000055436	Srsf11	-0.151194	6.84217	0.00963579	0.0466191
ENSMUSG00000028677	Rnf220	-0.149921	6.78099	0.00892798	0.043984
ENSMUSG00000026341	Actr3	-0.149847	7.68784	0.00813093	0.0408234
ENSMUSG00000021939	Ctsb	-0.148609	9.0465	0.00592135	0.0318705
ENSMUSG00000019132	BC005537	-0.146342	8.06095	0.00874262	0.043266
