# Supplementary material for: NF-κB RelA regulates temporal oligodendrocyte differentiation in the postnatal brains
Source: Front Cell Neurosci. 2025 Jul 22;19:1622874. doi: 10.3389/fncel.2025.1622874 (PMC12321842; doi:10.3389/fncel.2025.1622874)
Supplement: Supplementary file 2 [file Table_2.xlsx]

## Sheet: Sheet1
Putative RelA-targeted oligodendrocyte-related genes
SLC12A2
PDGFRA
PHLDB1
SEMA4D
DOCK9
FEM1B
TMEM132B
C1QL3
RAP1GAP
SIRT2
PAPSS1
DNM3
GJC2
PSTPIP2
EEF1A2
MICALL1
CDK14
PLEKHH1
CPM
ABCA2
MAPK8IP1
QK
PADI2
