# Supplementary material for: NF-κB RelA regulates temporal oligodendrocyte differentiation in the postnatal brains
Source: Front Cell Neurosci. 2025 Jul 22;19:1622874. doi: 10.3389/fncel.2025.1622874 (PMC12321842; doi:10.3389/fncel.2025.1622874)
Supplement: Supplementary file 3 [file Table_3.xlsx]

## Sheet: Sheet1
Alternative splicing alteration in Cnp-Cre; RelA cKO cerebral cortex (Oligodendrocyte-related genes)
gene	chrom	chromStart	chromEnd	name	score	strand	type	isoformIDs	coverage	I_g1(Ctrl)	I_g2(RelA cKO)	dI_g1_vs_g2	pvalue	FDR
102693//Phldb1	chr9	44686305	44688701	CA-102693-49582-49742-49775-50500[INC][1/22][DNT]	0	-	cass	INC/SKIP	35	0.510204	0.147059	0.363145	0.00414004	0.111028
234825//Klhdc4	chr8	121820121	121821357	A5-234825-11211-12349[A0][3/41]	0	-	alt5	A1/A0	25.8874	0.6875	0.38194	0.30556	0.00525845	0.0565283
20587//Smarcb1	chr10	75915063	75916910	A5-20587-7703-9421[A0][44/42]	0	-	alt5	A1/A0	21	0.636364	0.871795	-0.235431	0.0148546	0.119765
208869//Dock3	chr9	106901770	106906779	A3-208869-328277-333139[A1][6/1]	0	-	alt3	A0/A1	32	0.8125	0.5	0.3125	0.0163602	0.207774
59069//Tpm3	chr3	90090009	90100894	CA-59069-20429-21362-21441-29877[INC][10/154][DNT]	0	+	cass	INC/SKIP	47.3466	0.19673	0.125008	0.0717218	0.0286778	0.277376
84113//Ptov1	chr7	44864761	44865001	IR-84113-7786-7876-7953-8027[SPLICE][47/5]	0	-	iret	RET/SPLICE	173.749	0.624765	0.738016	-0.11325	0.00234761	0.0446046
225861//Snx32	chr19	5498179	5498505	IR-225861-14983-15094-15188-15310[SPLICE][11/1]	0	-	iret	RET/SPLICE	35.9999	0.845638	0.923977	-0.0783395	0.0251696	0.151694
110351//Rap1gap	chr4	137721825	137724800	CA-110351-60232-62020-62098-62966[INC][3/18]	0	+	cass	INC/SKIP	112.995	0.392	0.556951	-0.164951	0.0189012	0.237271
110351//Rap1gap	chr4	137726951	137727778	A3-110351-65350-66054[A0][18/1/2]	0	+	alt3	A0/A2	81.4735	0.723103	0.839157	-0.116054	0.0114745	0.201001
110175//Ggct	chr6	54986832	54989556	A5-110175-6310-8899[A0][4/35]	0	-	alt5	A1/A0	20	0.560976	0.92	-0.359024	0.000491621	0.0126838
59092//Pcbp4	chr9	106462188	106462413	IR-59092-11351-11415-11524-11577[SPLICE][30/1]	0	+	iret	RET/SPLICE	138	0.53271	0.338346	0.194364	0.000410603	0.0148479
14733//Gpc1	chr1	92857247	92857594	IR-14733-28562-28682-28786-28910[SPLICE][1/1][DNT]	0	+	iret	RET/SPLICE	57	0.292929	0.6	-0.307071	0.000324262	0.0129821
18823//Plp1	chrX	136831952	136833435	A5-18823-12117-13432[A1][1/16/38]	0	+	alt5	A2/A1	38.9453	0.873191	0.782368	0.0908236	0.00164085	0.0264588
17762//Mapt	chr11	104287122	104294923	CA-17762-58774-61472-61559-66423[INC][6/2]	0	+	cass	INC/SKIP	49.001	0.675673	0.425921	0.249752	0.004939	0.121417
17762//Mapt	chr11	104282367	104294923	CA-17762-54045-58687-58774-66423[INC][2/88]	0	+	cass	INC/SKIP	111.002	0.106577	0.184976	-0.0783993	0.0158254	0.212204
19215//Ptgds	chr2	25466708	25467344	A5-19215-5404-5918[A0][37/120][DNT]	0	-	alt5	A1/A0	382	0.681729	0.570312	0.111416	0.00125904	0.0232023
19215//Ptgds	chr2	25466708	25467344	IR-19215-5404-5463-5918-6041[SPLICE][34/1][DNT]	0	-	iret	RET/SPLICE	639	0.36621	0.445394	-0.0791841	0.00176779	0.0366979
19215//Ptgds	chr2	25466708	25467344	IR-19215-5404-5430-5918-6041[SPLICE][11/1][DNT]	0	-	iret	RET/SPLICE	382	0.68756	0.61165	0.0759098	0.00464715	0.0685454
226412//R3hdm1	chr1	128181985	128184653	IR-226412-81680-81907-84094-84349[SPLICE][7/1]	0	+	iret	RET/SPLICE	90.1521	0.297902	0.500187	-0.202285	0.00454697	0.0679621
30948//Bin1	chr18	32424819	32432092	ME-30948-50751-57766[M0][3/10]	0	+	mutx	M0/M1	297.041	0.601824	0.487642	0.114182	1.99935e-05	0.00349886
12305//Ddr1	chr17	35685305	35687309	CA-12305-19995-20548-20659-21589[INC][27/14]	0	-	cass	INC/SKIP	27.9988	0.666687	0.424262	0.242425	0.0292816	0.278648
17188//Maz	chr7	127022133	127024614	CA-17188-5036-5773-6003-6311[INC][6/32][DNT]	0	-	cass	INC/SKIP	140.687	0.329126	0.216792	0.112334	0.00722779	0.133262
